# Supplementary material for: Closed-loop upcycling of protein amyloid fibrils from food waste for atmospheric CO2 capture
Source: Research Square preprint supplement (doi:10.21203/rs.3.rs-7971598/v1), 2025-10-30
Supplement: Supplementary file 1 [file 515030166ce69ad0c4583f4e.pdf]

## Supplementary information

### **Closed-loop upcycling of protein amyloid fibrils from food waste for atmospheric CO<sub>2</sub> capture**

Zhou Dong<sup>1</sup>, Ming Dai<sup>1,2</sup>, Felix Donat<sup>3</sup>, Dominik Richert<sup>3</sup>, Bin Dai<sup>4</sup>, Jiangtao Zhou<sup>5</sup>, Milad Radiom<sup>1</sup>, Mohammad Peydayesh<sup>1</sup>, Yanwen Li<sup>1</sup>, Xiuhuai Li<sup>6</sup>, Hui Wu<sup>6</sup>, Christoph R. Müller<sup>3</sup>, Wenshuai Chen<sup>2</sup>, Raffaele Mezzenga<sup>1,7\*</sup>

<sup>1</sup> *ETH Zürich, Department of Health Sciences and Technology, 8092 Zürich, Switzerland*

<sup>2</sup> *Key Laboratory of Bio-based Material Science and Technology, Ministry of Education, Northeast Forestry University, Harbin 150040, P.R. China*

<sup>3</sup> *ETH Zürich, Department of Mechanical and Process Engineering, Leonhardstrasse 21, CH-8092 Zürich, Switzerland*

<sup>4</sup> *School of Sensing Science and Engineering, School of Electronic Information and Electrical Engineering, Shanghai Jiao Tong University, Shanghai 200240, P.R. China*

<sup>5</sup> *Department of Food Science and Technology, National University of Singapore, Singapore*

<sup>6</sup> *College of Food Science and Engineering, South China University of Technology, Guangzhou 510640, P.R. China*

<sup>7</sup> *ETH Zürich, Department of Materials, 8093 Zürich, Switzerland*

\* Corresponding author

E-mail: [raffaele.mezzenga@hest.ethz.ch](mailto:raffaele.mezzenga@hest.ethz.ch)

## 24 Table of Contents

|    |                                                                                                 |    |
|----|-------------------------------------------------------------------------------------------------|----|
| 25 | Supplementary information .....                                                                 | 1  |
| 26 | Section 1. Design Rationale Information.....                                                    | 4  |
| 27 | 1.2 Ocean-inspired design rationale .....                                                       | 5  |
| 28 | 1.3 Challenges in hydroxide-based sorbents.....                                                 | 7  |
| 29 | Section 2. Small-Angle X-Ray Scattering (SAXS) .....                                            | 8  |
| 30 | Section 3. Transmission Electron Microscopy (TEM).....                                          | 9  |
| 31 | Section 4. Atomic Force Microscopy (AFM).....                                                   | 10 |
| 32 | Section 5. Synthesis of Microbeads.....                                                         | 11 |
| 33 | Section 6. Scanning Electron Microscopy (SEM).....                                              | 12 |
| 34 | Section 7. Dry Ice Vapor Sorption.....                                                          | 14 |
| 35 | Section 8. Single-Component Water Vapor Sorption Measurements.....                              | 15 |
| 36 | Section 9. Instrument for Dynamic Breakthrough Measurements .....                               | 16 |
| 37 | Section 10. Dynamic Breakthrough Measurements .....                                             | 19 |
| 38 | Section 11. Single-Component Nitrogen Sorption Measurements .....                               | 23 |
| 39 | Section 12. Detailed Sorbent Comparison for Direct Air Capture .....                            | 30 |
| 40 | Section 13. Instrument for Desorption and Regeneration.....                                     | 34 |
| 41 | Section 14. Dynamic Desorption and Regeneration Measurements.....                               | 35 |
| 42 | Section 15. Thermogravimetric Analysis (TGA) .....                                              | 41 |
| 43 | Section 16. Density Functional Theory (DFT) Calculations.....                                   | 44 |
| 44 | Section 17. Single-Component CO <sub>2</sub> Sorption Measurements .....                        | 49 |
| 45 | Section 18. <i>In situ</i> Diffuse Reflectance Infrared Fourier Transform Spectroscopy (DRIFTS) |    |
| 46 | .....                                                                                           | 50 |
| 47 | Section 19. Powder X-ray Diffraction (PXRD) .....                                               | 53 |
| 48 | Section 20. Molecular Dynamics (MD) Calculations .....                                          | 57 |
| 49 | Section 21. Reduced Density Gradient (RDG) Measurement .....                                    | 63 |
| 50 | Section 22. Life Cycle Assessment (LCA) .....                                                   | 67 |
| 51 | 22.1 Target and scope definition.....                                                           | 67 |
| 52 | (1) Target .....                                                                                | 67 |
| 53 | (2) Functional unit.....                                                                        | 67 |
| 54 | (3) System boundary .....                                                                       | 67 |
| 55 | (4) Cut-off criteria.....                                                                       | 68 |

|    |                                                       |    |
|----|-------------------------------------------------------|----|
| 56 | 22.2 Process data collection.....                     | 69 |
| 57 | 22.3 Life cycle impact assessment (LCIA).....         | 74 |
| 58 | Section 23. Biodegradability Test.....                | 78 |
| 59 | Section 24. The Ranking Efficiency Product (REP)..... | 79 |
| 60 | 24.1 Definition and calculation .....                 | 79 |
| 61 | 24.2 Calculation boundaries .....                     | 80 |
| 62 | Section 25. Techno-Economic Assessment (TEA).....     | 83 |
| 63 | Section 26. Roasted Coffee Bean Degassing.....        | 84 |
| 64 | Section 27. In vitro Simulated Digestion.....         | 87 |
| 65 | Section 28. Potential Application in Fertilizer.....  | 89 |
| 66 | References.....                                       | 90 |
| 67 |                                                       |    |
| 68 |                                                       |    |

Section 1. Design Rationale Information

1.1 Circular DAC strategy based on food waste.

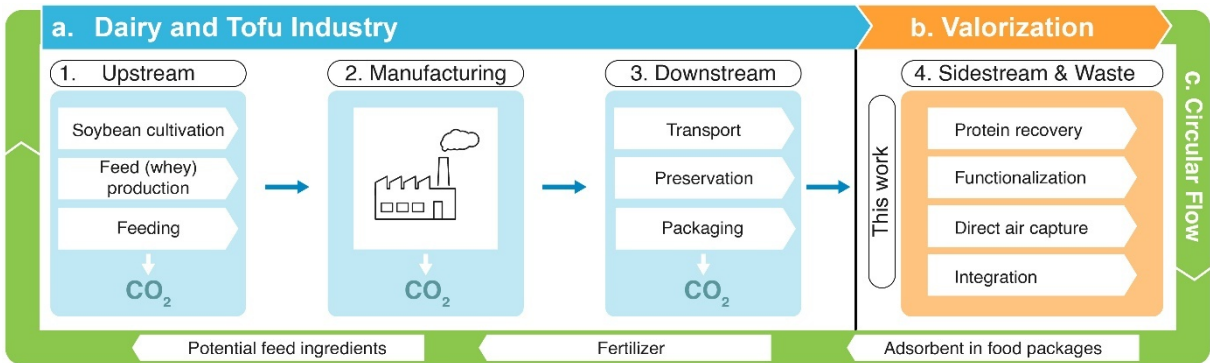

**Supplementary Fig. 1 | Illustration of the circular DAC strategy.** **a**, Carbon-intensive sections across dairy and tofu production chains, highlighting upstream (feed production and farming), manufacturing, and downstream (distribution, preservation, and packaging) emissions. Proposed closed-loop pathway that valorizes protein waste into  $\text{CO}_2$  capture sorbents (**b**), followed by food system reintegration through application in food packages, potential feed ingredient, or fertilizer (**c**).



## 1.2 Ocean-inspired design rationale

The direct ocean capture system exploits the bicarbonate-carbonate equilibrium dynamics in seawater to facilitate  $\text{CO}_2$  sequestration<sup>1,2</sup> (**Supplementary Fig. 2**). Upon dissolution, atmospheric  $\text{CO}_2$  forms carbonic acid ( $\text{H}_2\text{CO}_3$ ), which rapidly dissociates into bicarbonate ( $\text{HCO}_3^-$ ) and hydrogen ions at typical oceanic pH ranges ( $\sim\text{pH } 8$ ). This dissociation drives the neutralization reaction within the alkalinity pool, which is primarily composed of bicarbonate and carbonate ions ( $\text{CO}_3^{2-}$ ), serving as the system's buffering capacity. In the presence of calcium ions ( $\text{Ca}^{2+}$ ), carbonate ions combine to form calcium carbonate ( $\text{CaCO}_3$ ). This carbon fixation process is often facilitated by marine organisms, such as coccolithophores, corals, and shellfish, which utilize  $\text{CaCO}_3$  to build their shells and skeletons. The regeneration of the alkalinity pool involves the dissolution of calcium carbonate ( $\text{CaCO}_3$ ), releasing carbonate ions back into solution. This mineralization-dissolution cycle maintains system alkalinity while permanently sequestering captured  $\text{CO}_2$ .

In our alkaline-amyloid fibril system, the KOH (an alkalinity pool) reacts with  $\text{CO}_2$  to form bicarbonate, and the amyloid fibrils with rich amine groups (analogous to marine organisms) have a similar function to  $\text{CaCO}_3$  in fixing the bicarbonate (**Supplementary Fig. 3**).

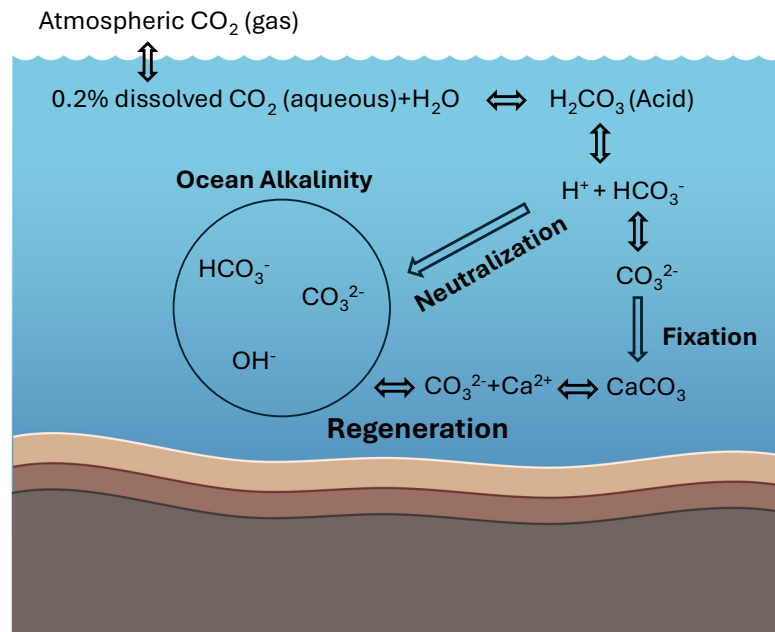

**Supplementary Fig. 2 | The thermal-free  $\text{CO}_2$  capture, fixation, and regeneration process by the ocean.**

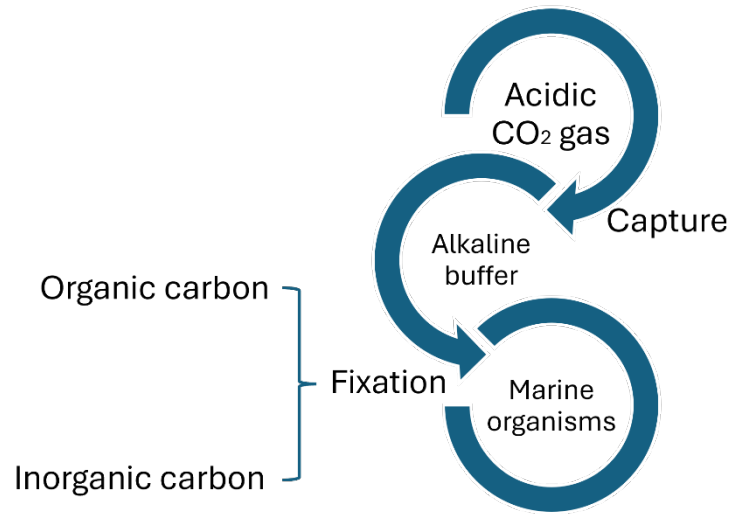

**Supplementary Fig. 3 | Carbon capture and fixation by alkaline buffer system and marine organisms.**

### 1.3 Challenges in hydroxide-based sorbents

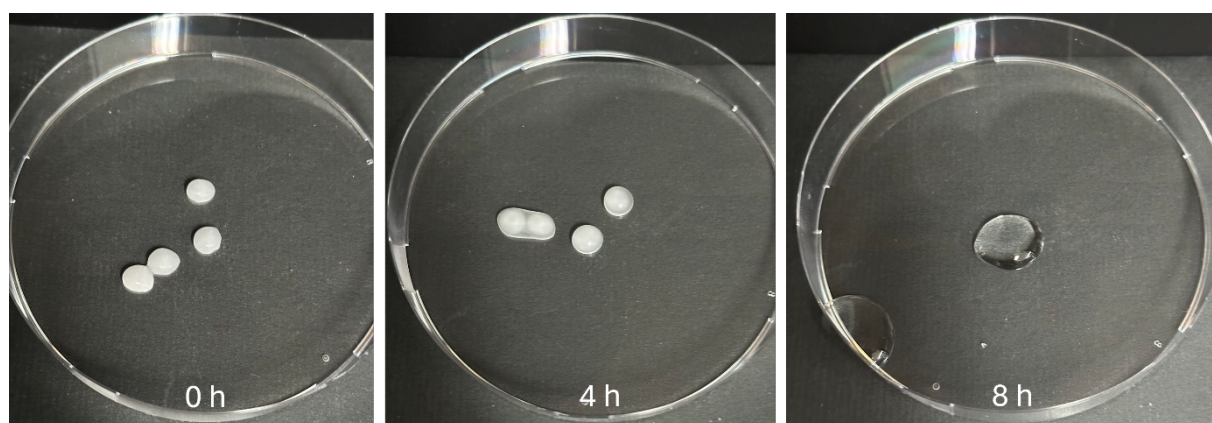

**Supplementary Fig. 4 | Deliquescence of KOH pellet at ambient air under 40–50% RH at 25 °C after 4-h and 8-h exposure.**

## Section 2. Small-Angle X-Ray Scattering (SAXS)

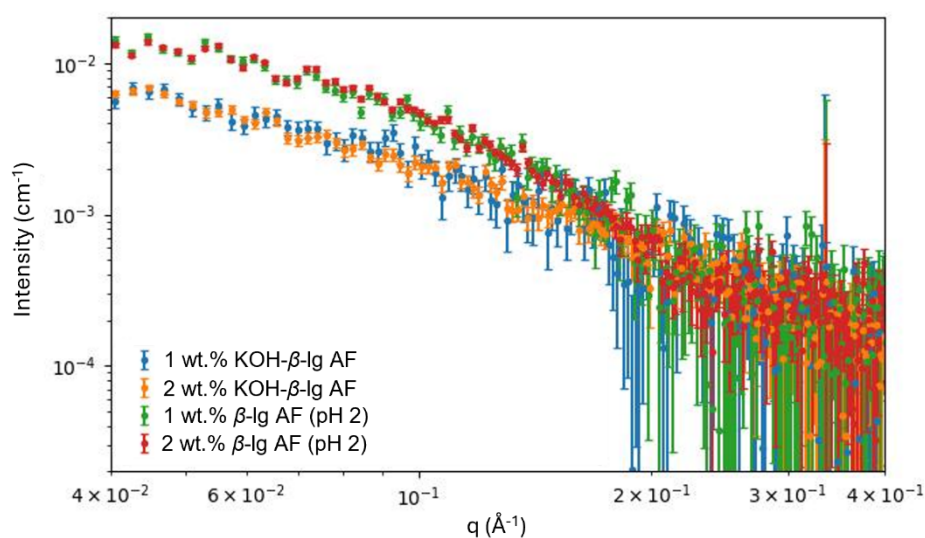

**Supplementary Fig. 5 | Normalized SAXS spectra of 1 wt% and 2 wt%  $\beta$ -lg AFs at pH 2 and pH 12–13.** 2 wt%  $\beta$ -lg AF was mixed with 1 M KOH at a 5:1 mass ratio and incubated for 7 days before measurement. 1 wt%  $\beta$ -lg AF solution at pH 12–13 was prepared by diluting the 2 wt% solution with distilled water at pH 12.

**Supplementary Table 1 | Geometrical parameters of the AF at pH 2 and 12–13 based on fitting SAXS spectra to cylindrical form factor.** To improve the fitting results, a similar diameter was assumed.

| Fit parameters | Length (nm) | Diameter (nm) |
|----------------|-------------|---------------|
| pH 2.0         | ~7400       | ~2.6          |
| pH (KOH)       | ~950        | ~2.6          |



139 Section 3. Transmission Electron Microscopy (TEM)

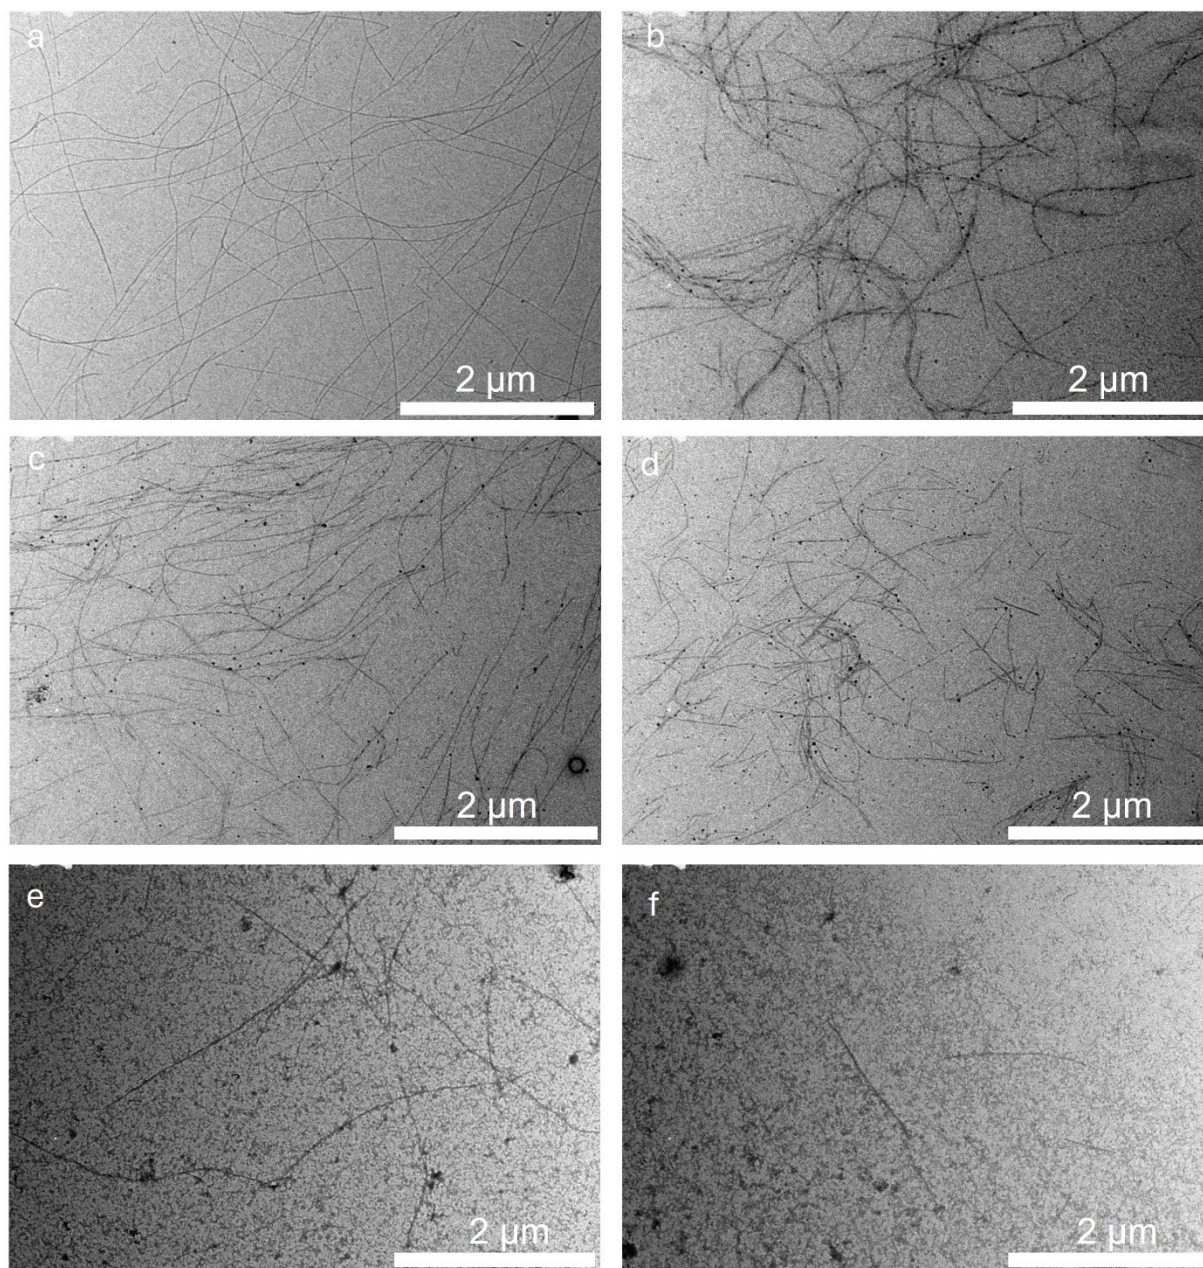

140 **Supplementary Fig. 6 | TEM images of  $\beta$ -lg AF at pH 2 (a) and KOH- $\beta$ -lg AF after 7-day**  
141 **(b) and 2-month incubation (c,d); SPI AF at pH 2 (e) and KOH-SPI AF after 7-day**  
142 **incubation (f).** The scale bar is 2  $\mu$ m. The images are representative of three technical replicates  
143 **(n = 3), each yielding similar results.**

## Section 4. Atomic Force Microscopy (AFM)

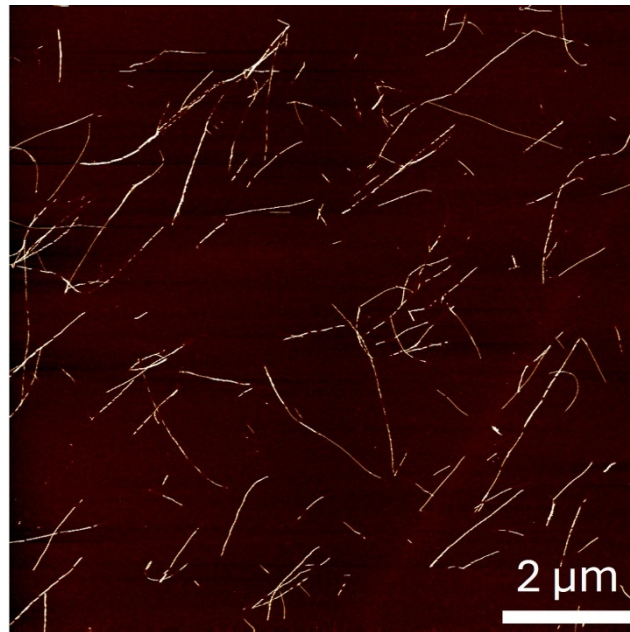

**Supplementary Fig. 7 | AFM images of KOH- $\beta$ -Ig AF after 2-month incubation.** The scale bar is 2  $\mu$ m. The images are representative of three technical replicates ( $n = 3$ ), each yielding similar results.

## Section 5. Synthesis of Microbeads

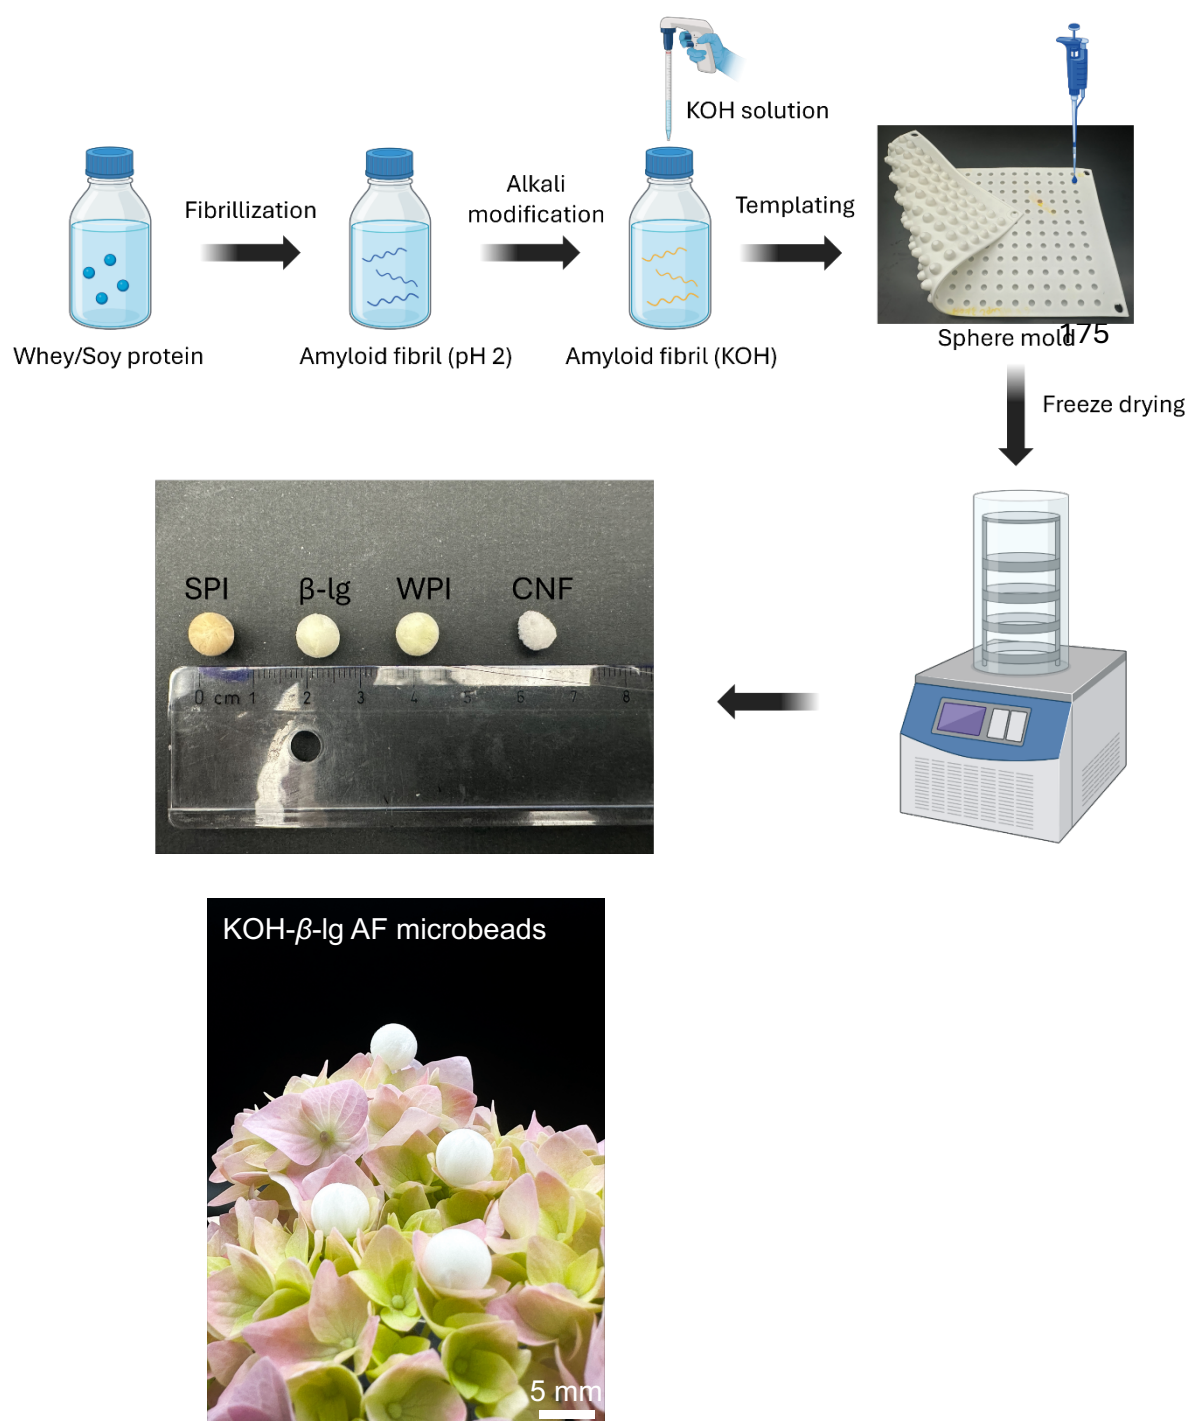

**Supplementary Fig. 8 | Schematic of the synthesis of KOH-AF microbeads using SPI,  $\beta$ -lg, WPI, and CNF by sphere mold templating.**  $\beta$ -lg AF (3 wt%), WPI AF (5 wt%), SPI AF (4 wt%), and WPI monomer (5 wt%) solutions at pH 2 were mixed with concentrated KOH solution (2 M) at a dry mass ratio of 5:1 mass for  $\beta$ -lg AF, WPI AF, and WPI monomer, and 10:1 for SPI AF. The color of KOH- $\beta$ -lg and WPI AF microbeads gradually turned from white to yellow under prolonged storage in a sealed container (1–10 weeks). Scale bar, 5 mm.



## Section 6. Scanning Electron Microscopy (SEM)

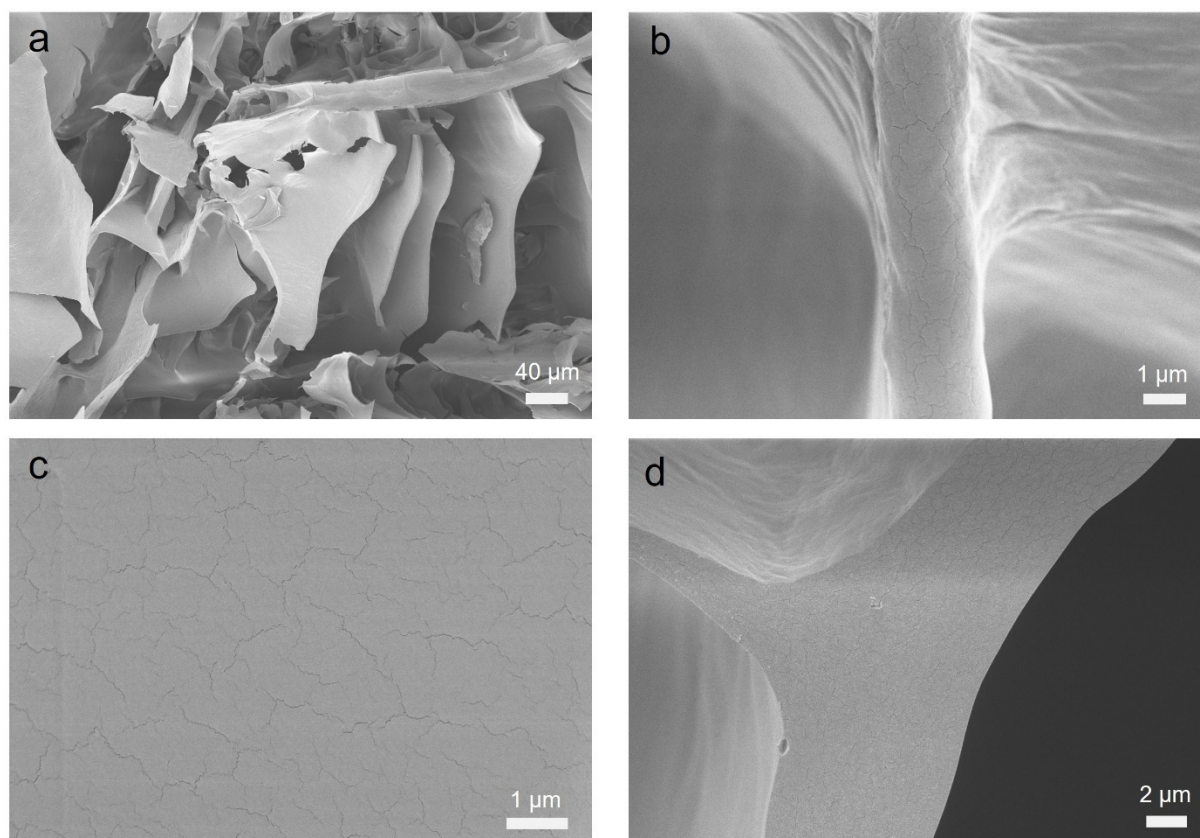

**Supplementary Fig. 9 | SEM images of surface (a–c) and cross-section (d) of unmodified  $\beta$ -lg AF microbeads.**



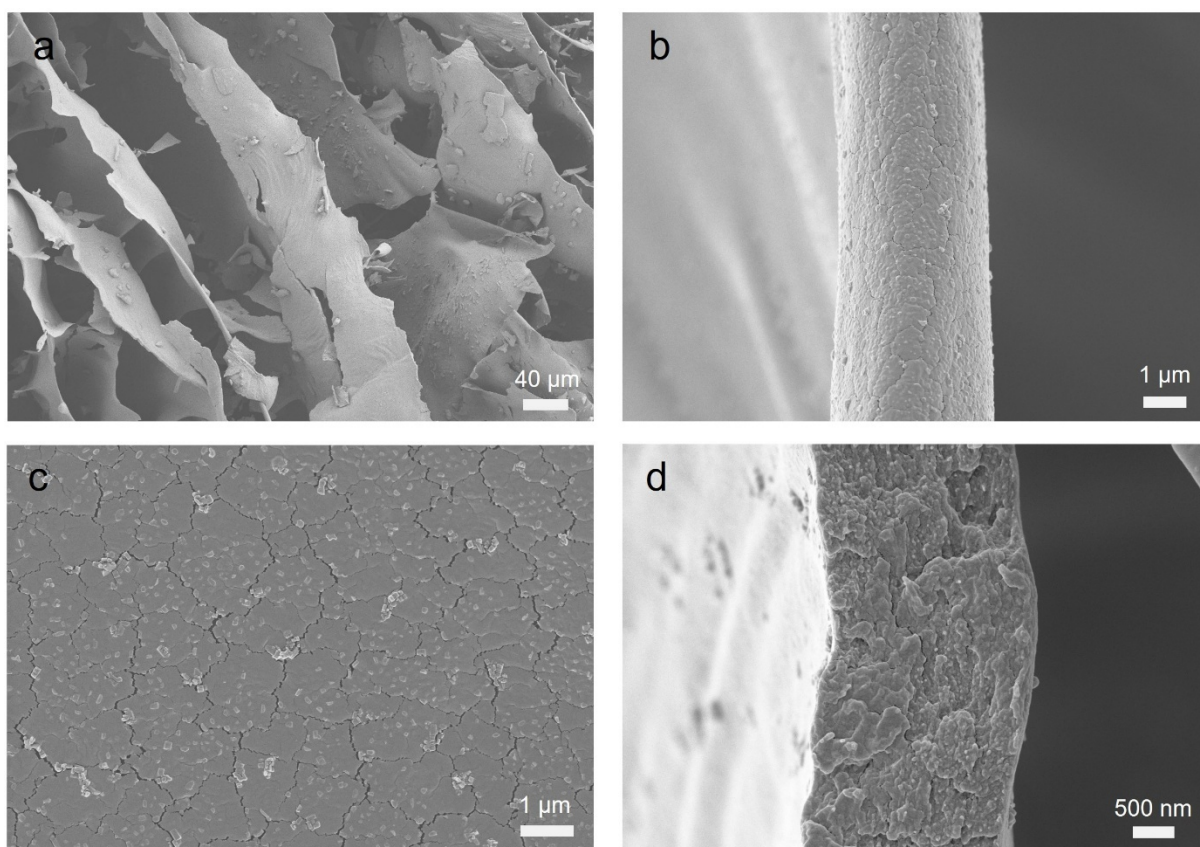

**Supplementary Fig. 10 | SEM images of surface (a–c) and cross-section (d) of KOH-modified  $\beta$ -Ig AF microbeads.** The microbeads were stored in a sealed vial for 2 weeks before measurement, showing the stability of AF microbeads under prolonged alkaline exposure.

## Section 7. Dry Ice Vapor Sorption

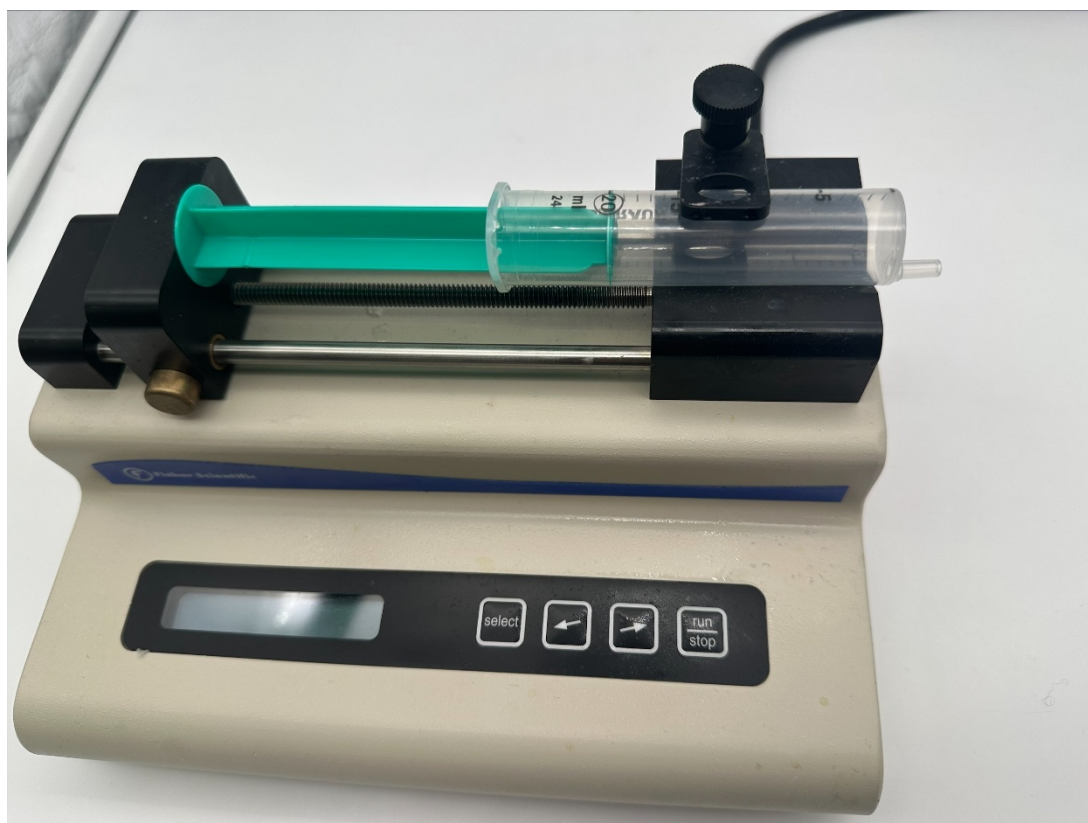

**Supplementary Fig. 11 | The syringe pump for the generation of dry ice smoke with controlled flow direction and rate. 1 g of solid dry ice was mixed with 4 ml of distilled water inside the syringe. The flow rate was 420 ml h<sup>-1</sup>.**

## Section 8. Single-Component Water Vapor Sorption Measurements

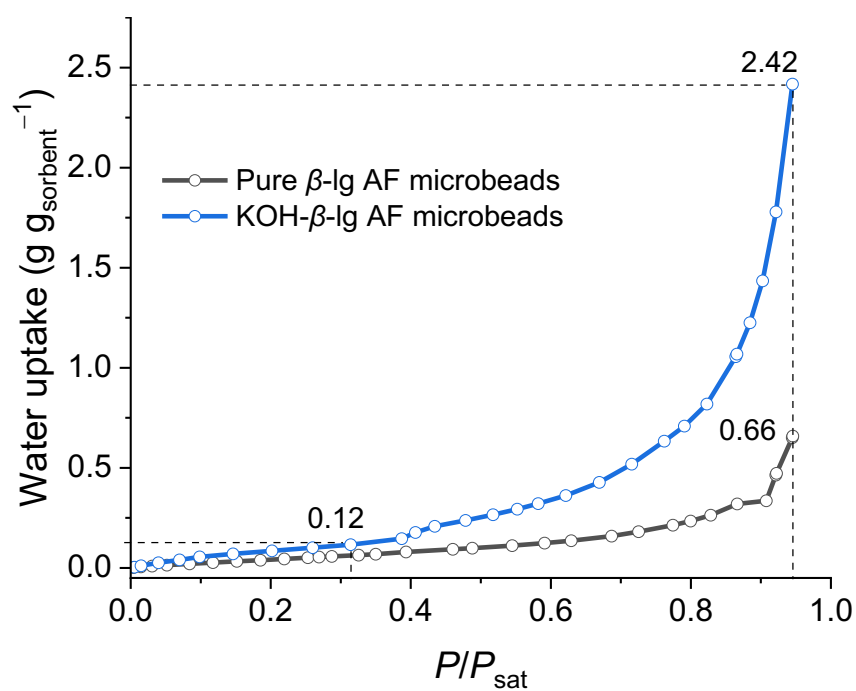

**Supplementary Fig. 12 | Single-component water vapor sorption isotherm measured at 25 °C.  $P$  is water vapor pressure, and  $P_{\text{sat}}$  is the saturation water vapor pressure.**

## Section 9. Instrument for Dynamic Breakthrough Measurements

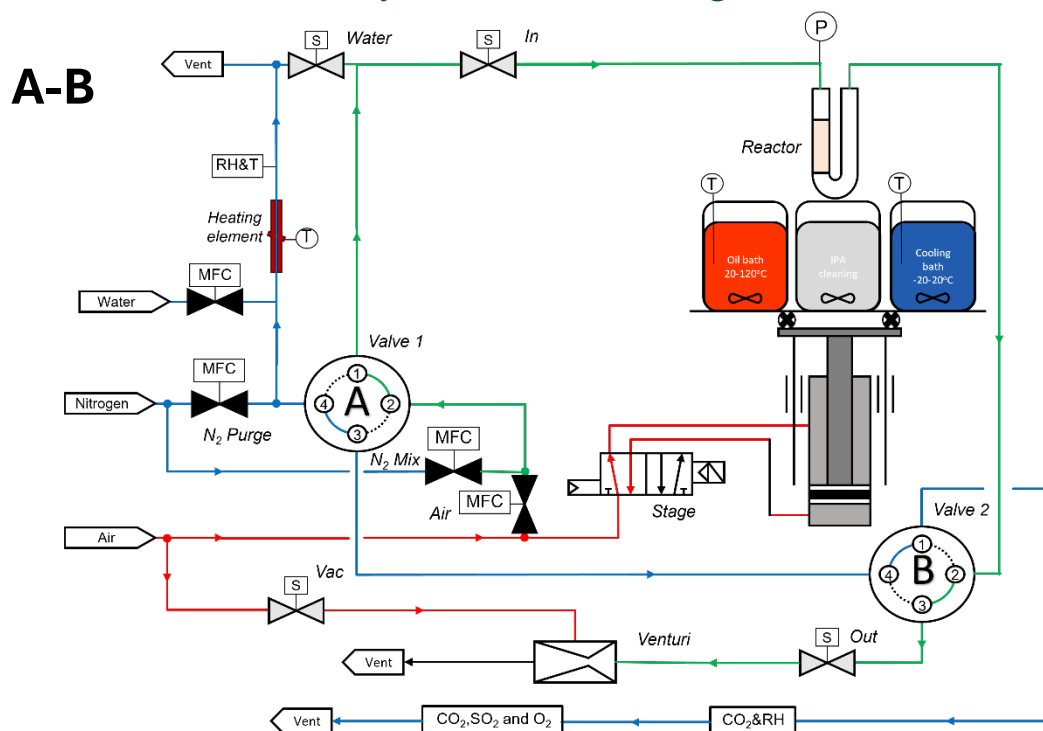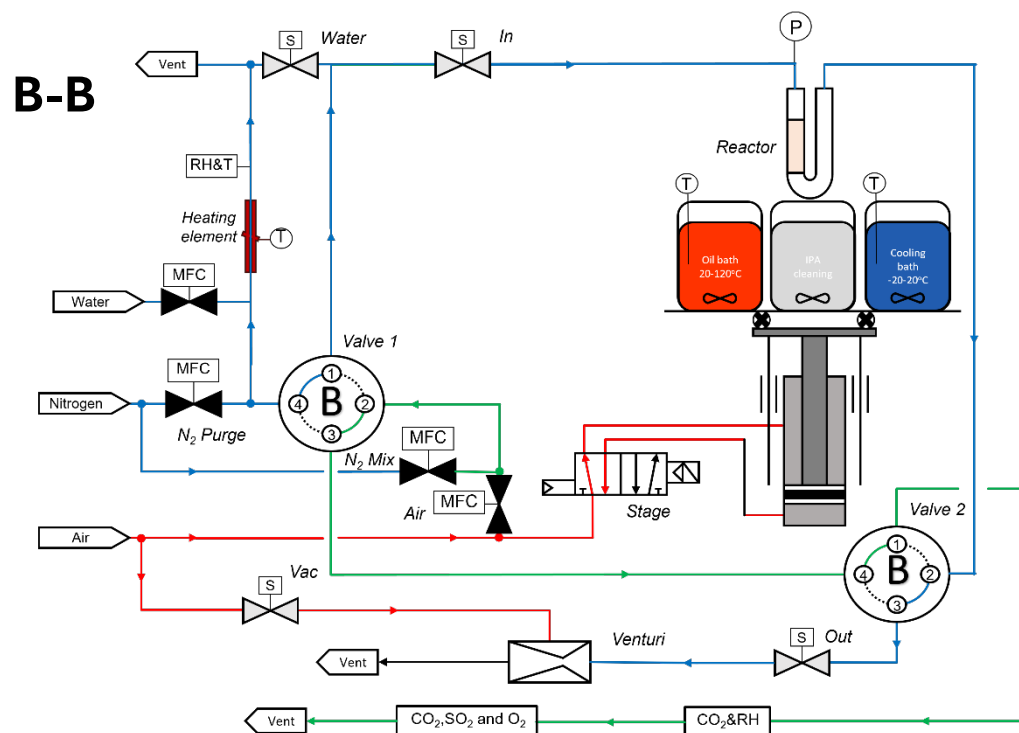

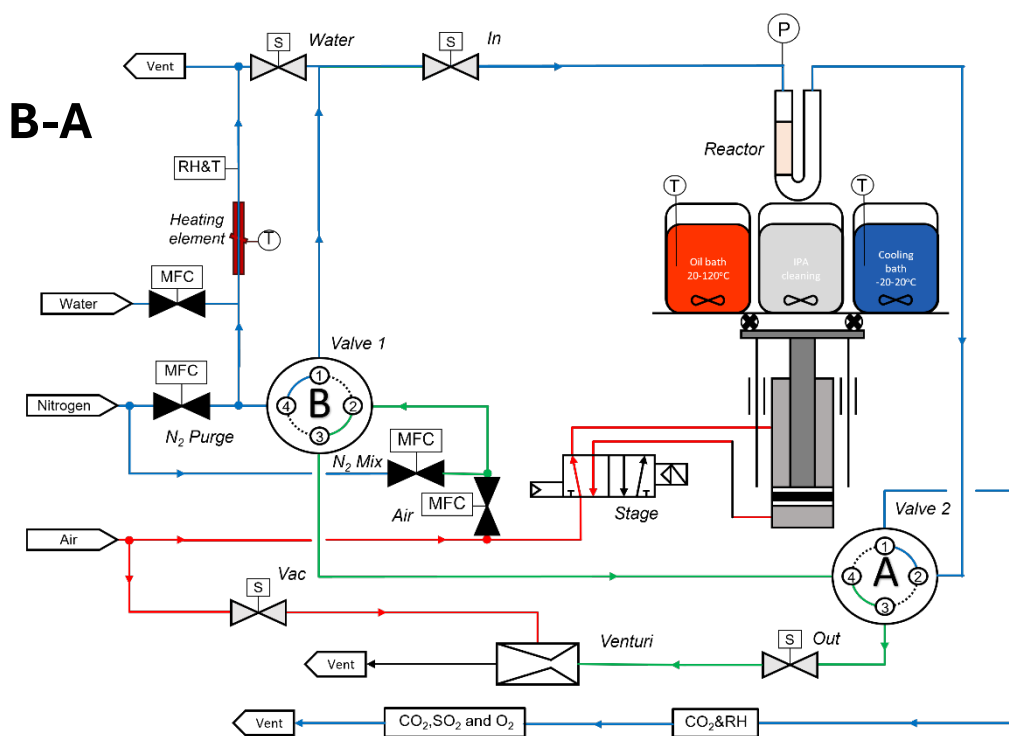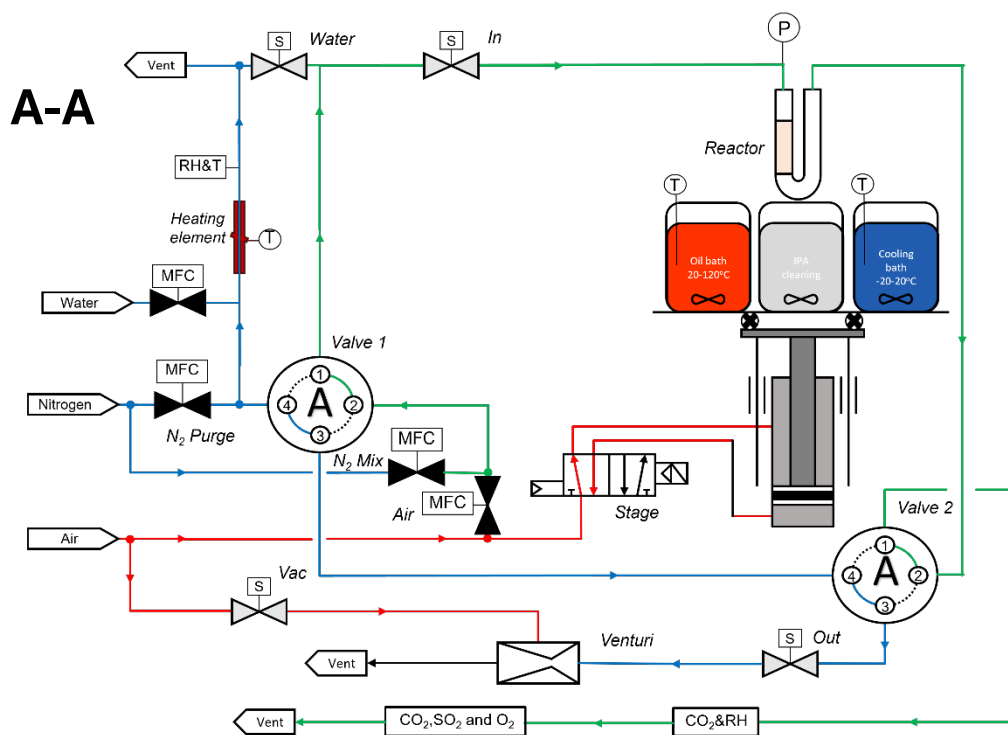

**Supplementary Fig. 13 | Schematic diagram of the dynamic breakthrough measurement instrument.**

279 **Supplementary Table 2 | Function of valves in the dynamic breakthrough measurement**  
 280 **instrument**

| Valve | Position | Effect                                      |
|-------|----------|---------------------------------------------|
| 1     | A        | Gas mix to reactor, purge to bypass         |
|       | B        | Purge to reactor, gas mix to bypass         |
| 2     | A        | Reactor gas to analyzers, bypass to venturi |
|       | B        | Reactor gas to venturi, bypass to analyzers |

281

282 Section 10. Dynamic Breakthrough Measurements

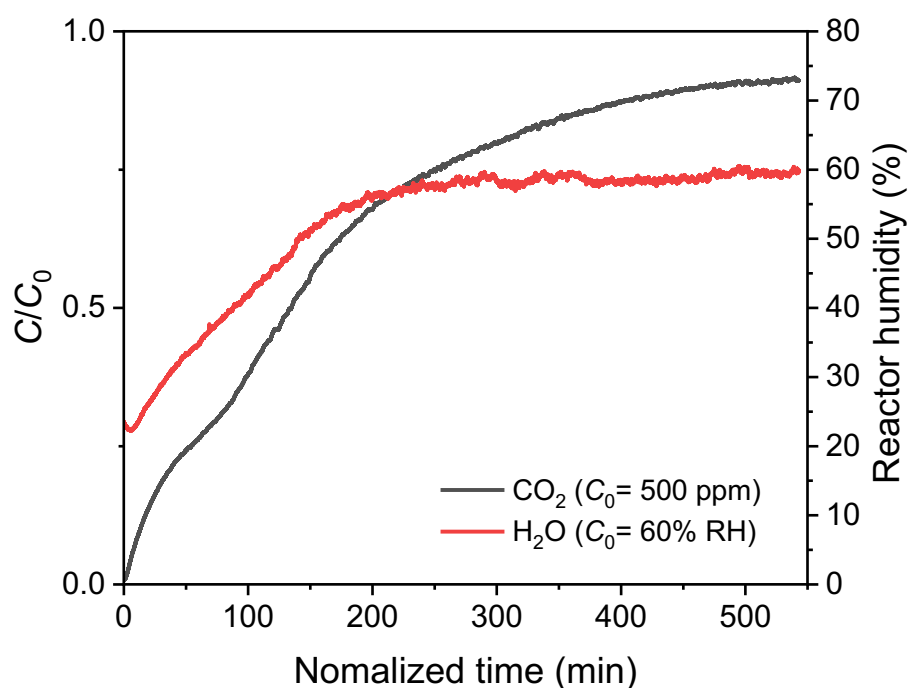

283

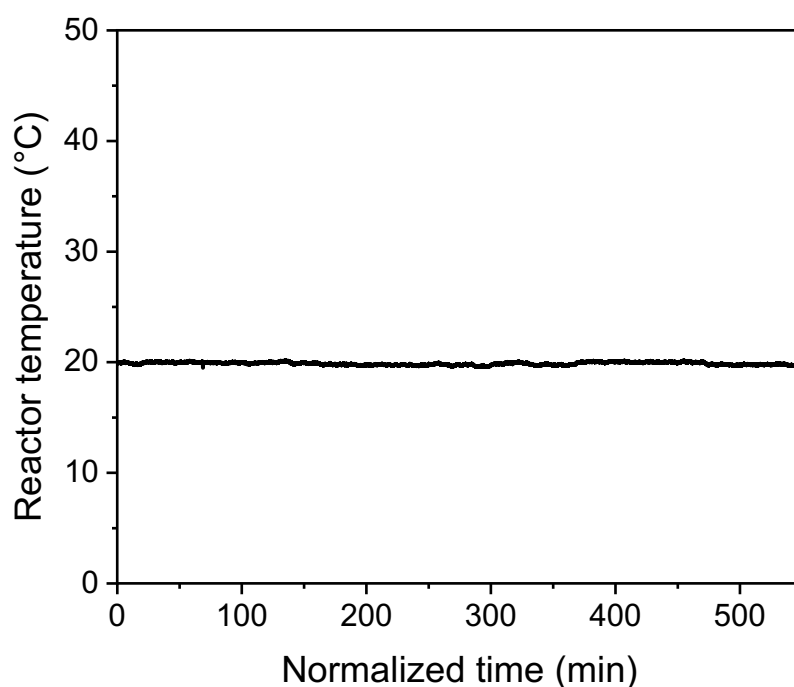

284 **Supplementary Fig. 14 | Dynamic breakthrough measurements of KOH-WPI AF**  
 285 **microbeads using simulated air (500 ppm of  $\text{CO}_2$  balanced in  $\text{N}_2$  with 60% RH) at  $20^{\circ}\text{C}$ .**  
 286  $100 \pm 10$  mg of microbeads were degassed at  $90^{\circ}\text{C}$  for 30 min in  $\text{N}_2$ , cooled down by methanol,  
 287 and then prehumidified for 10 min before exposure to air.

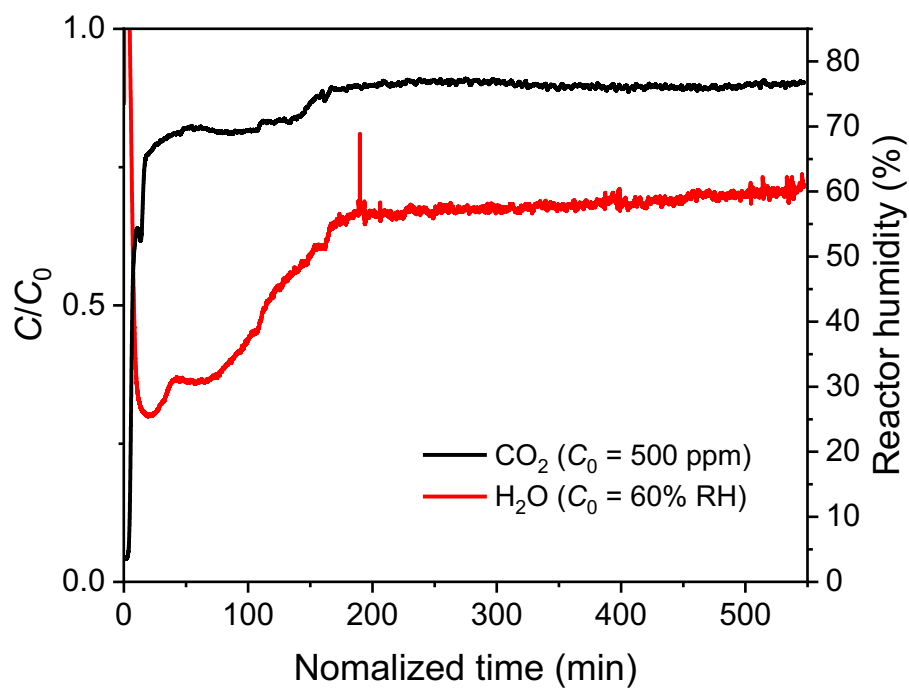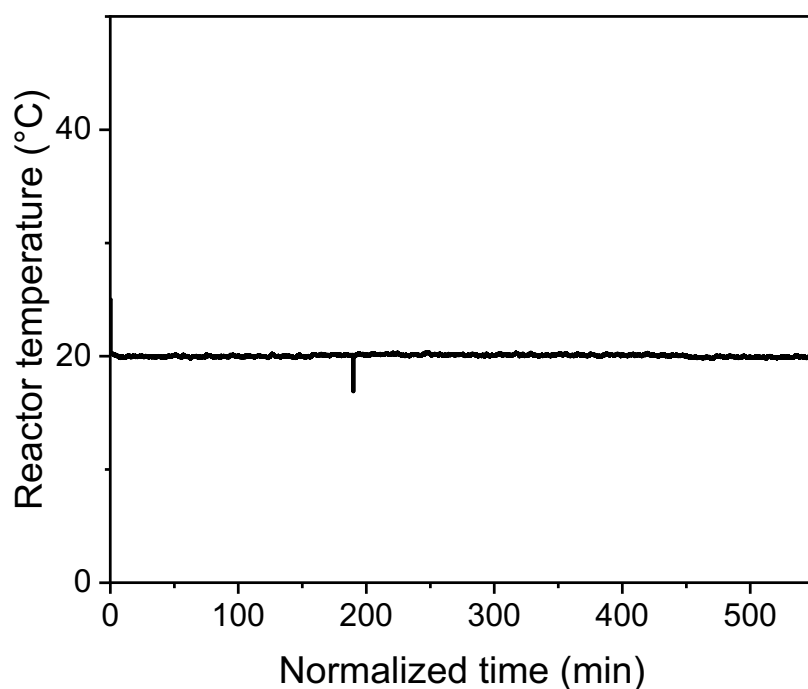

**Supplementary Fig. 15 | Dynamic breakthrough measurements of KOH-SPI AF microbeads using simulated air (500 ppm of  $\text{CO}_2$  balanced in  $\text{N}_2$  with 60% RH) at 20  $^{\circ}\text{C}$ . 100  $\pm$  10 mg of microbeads were degassed at 90  $^{\circ}\text{C}$  for 30 min in  $\text{N}_2$ , cooled down by methanol, and then prehumidified for 10 min before exposure to air.**



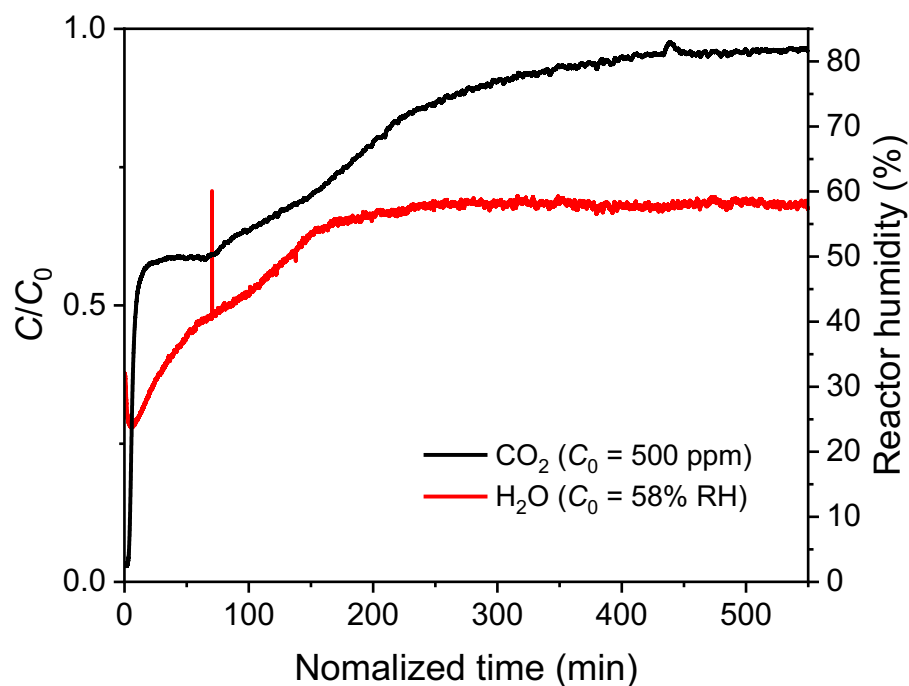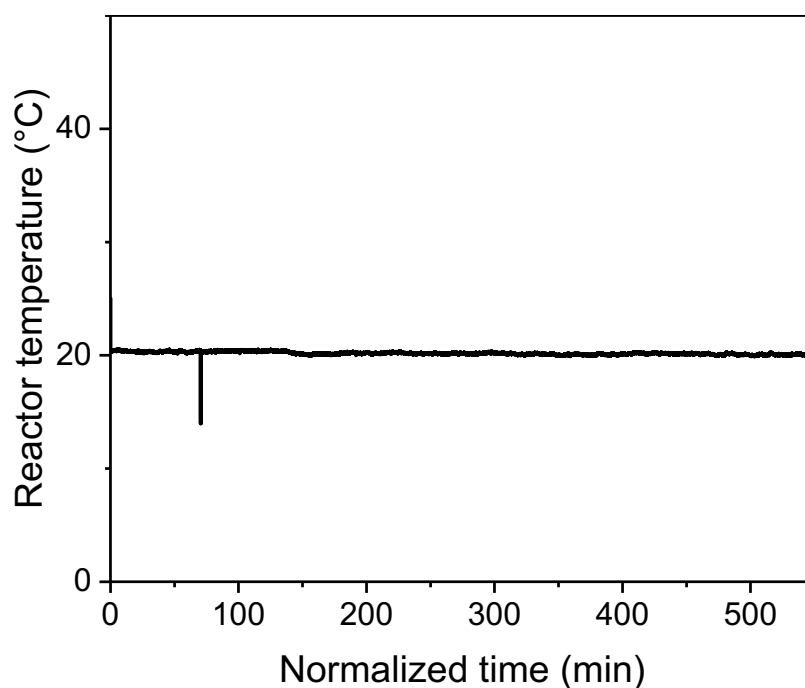

**Supplementary Fig. 16 | Dynamic breakthrough measurements of KOH-WPI monomer microbeads using simulated air (500 ppm of  $\text{CO}_2$  balanced in  $\text{N}_2$  with 58% RH) at 20 °C.** 100 ± 10 mg of microbeads were degassed at 90 °C for 30 min in  $\text{N}_2$ , cooled down by methanol, and then prehumidified for 10 min before exposure to air.

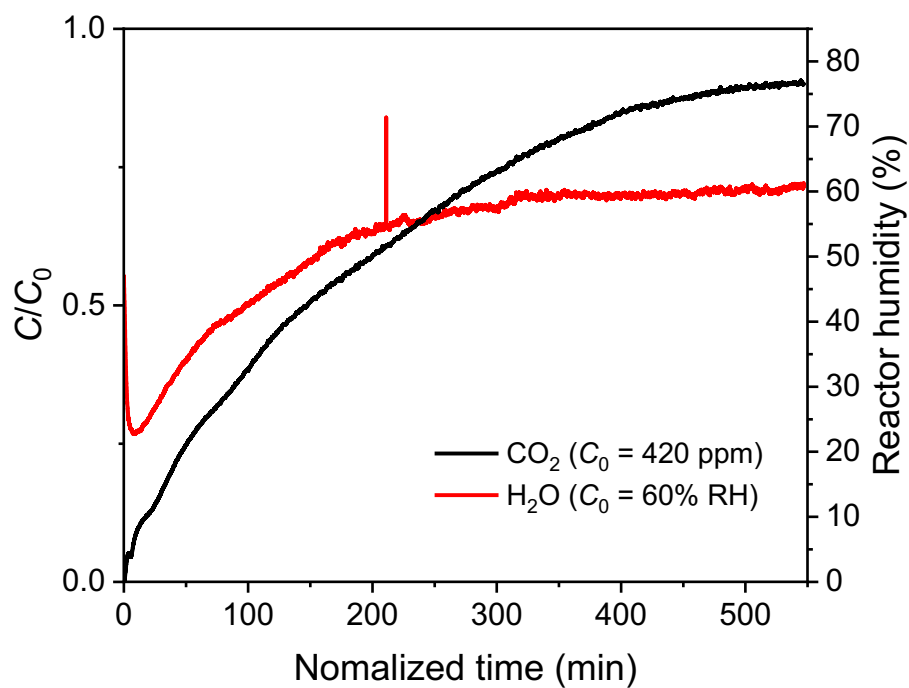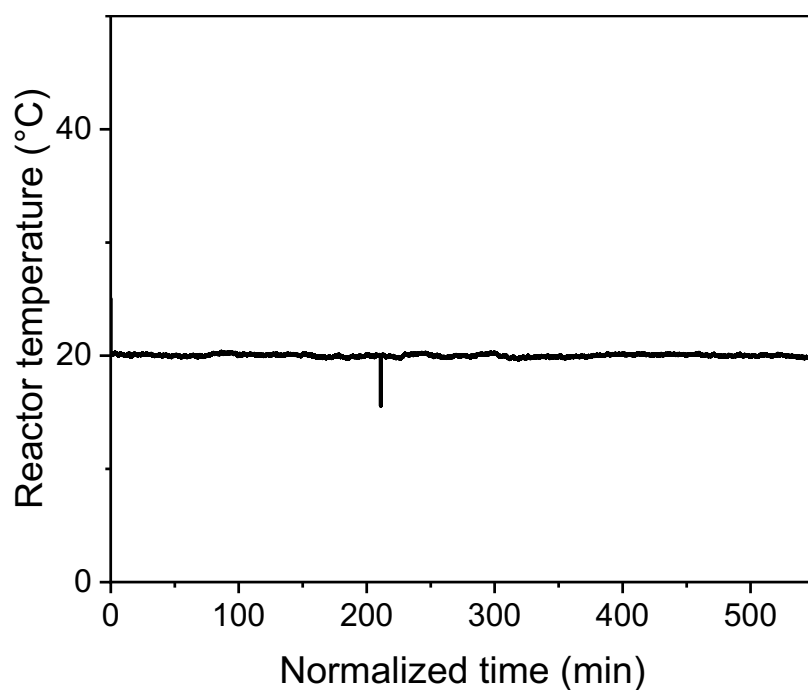

**Supplementary Fig. 17 | Dynamic breakthrough measurements of KOH-WPI AF microbead using compressed air at 20 °C.**  $100 \pm 10$  mg of microbeads were degassed at 90 °C for 30 min in  $\text{N}_2$ , cooled down by methanol, and then prehumidified for 10 min before exposure to air.

305    Section 11. Single-Component Nitrogen Sorption Measurements

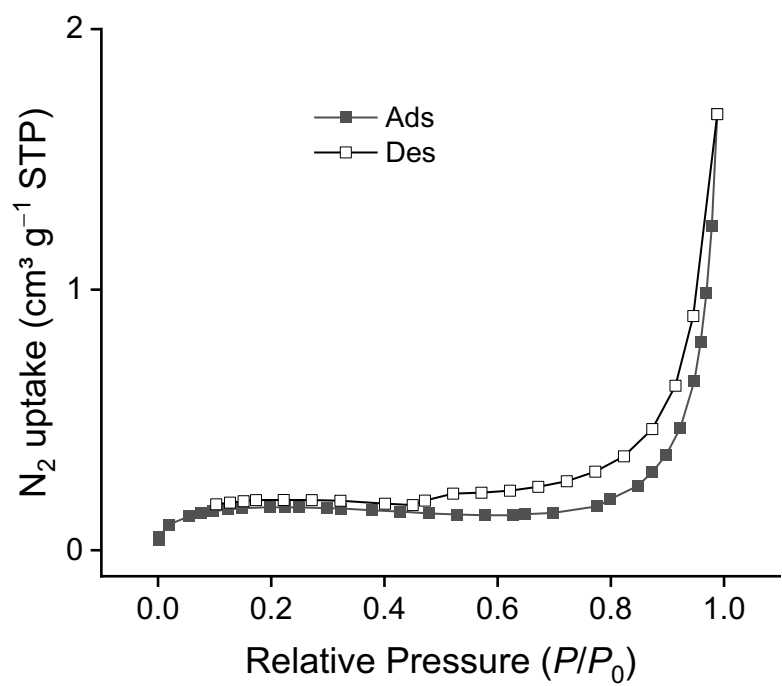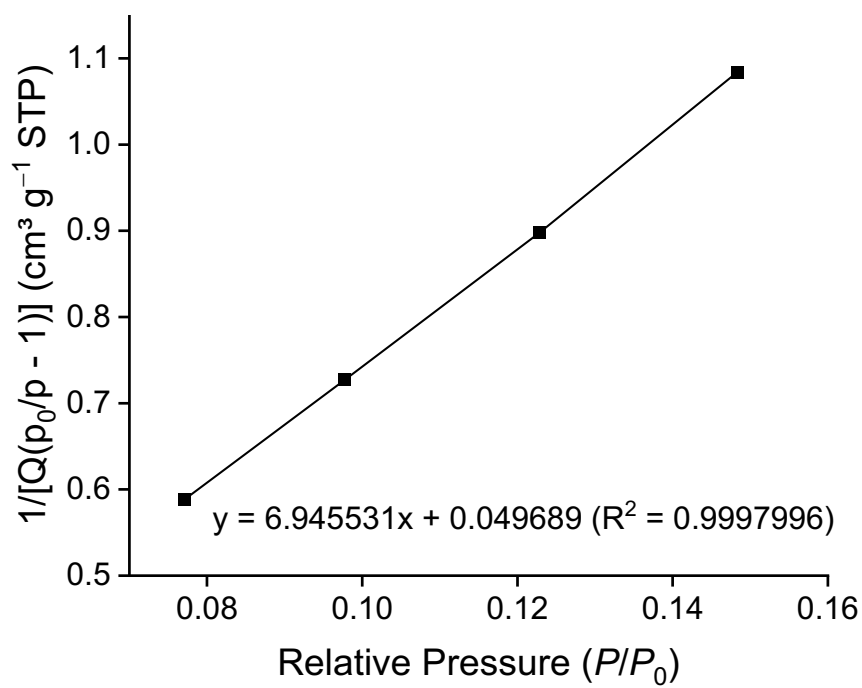

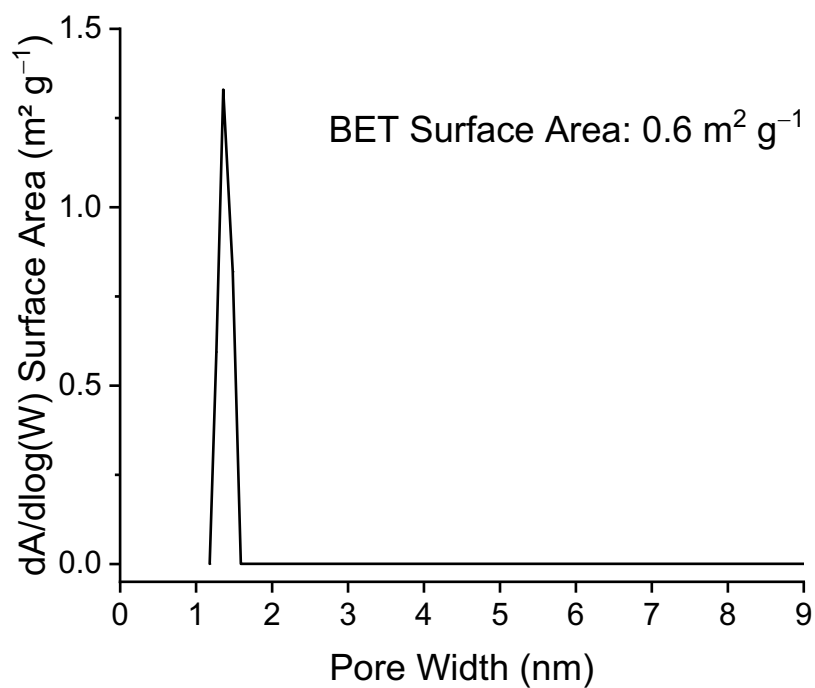

**Supplementary Fig. 18 | N<sub>2</sub> sorption isotherms of KOH-β-Ig AF microbeads measured at 77 K, corresponding BET plot, linear fitting, and pore size distribution calculated from the sorption isotherm.** *P* is nitrogen pressure; *P*<sub>0</sub> = 1 atm under standard temperature and pressure. The BET surface area of the microbead is 0.6 m<sup>2</sup> g<sup>-1</sup>.

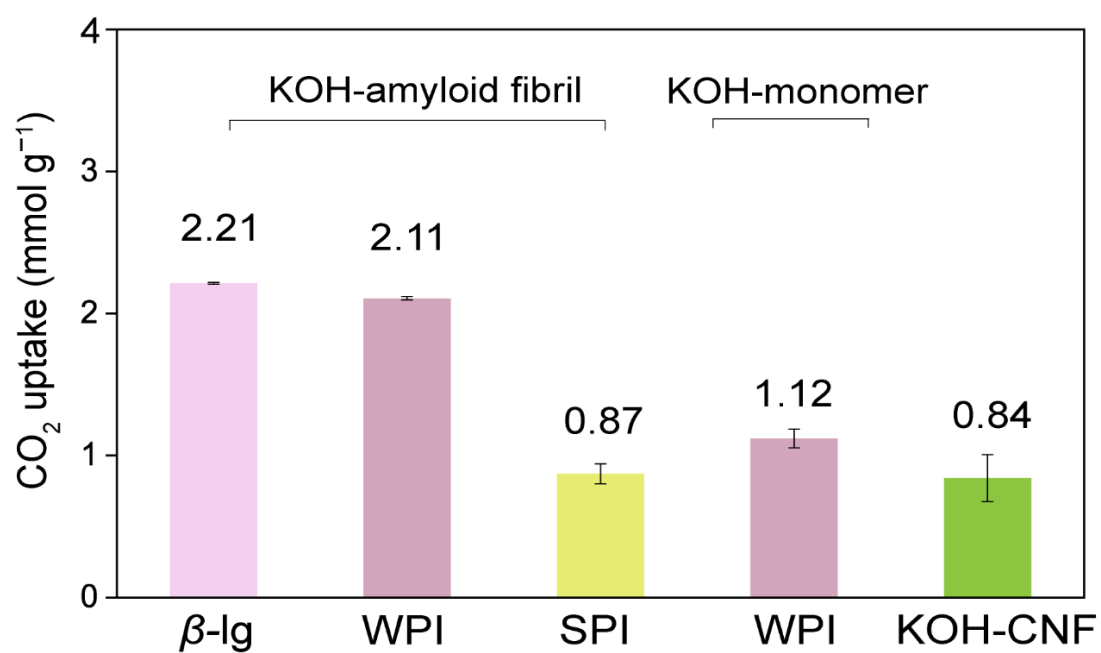

**Supplementary Fig. 19 | CO<sub>2</sub> uptake of KOH-modified AF ( $\beta$ -lg, WPI, and SPI), WPI monomer, and CNF microbeads under humid simulated air.** The data shown are statistical averages, and the error bars represent 1 standard deviation.

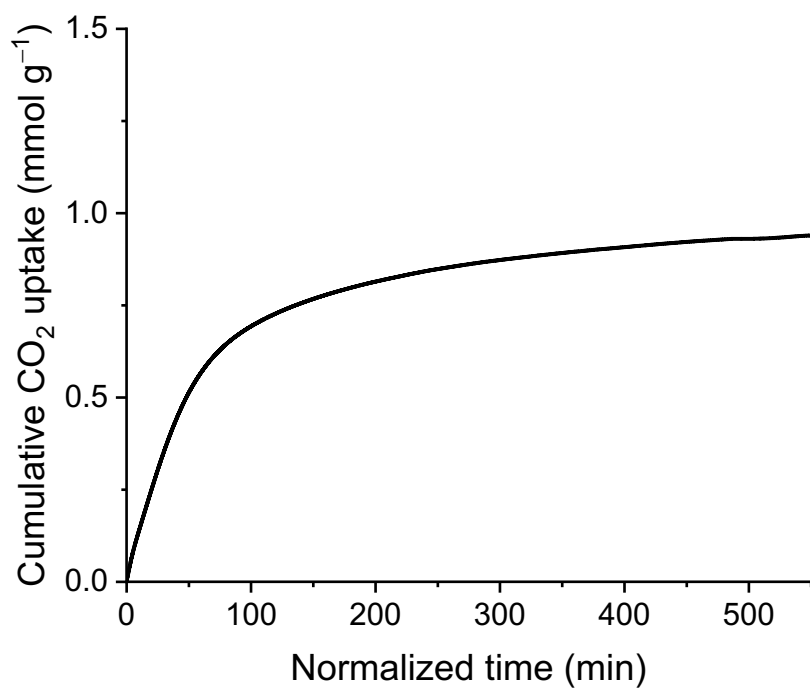

**Supplementary Fig. 20 | Cumulative CO<sub>2</sub> uptake of the KOH-SPI AF microbead using simulated air (500 ppm of CO<sub>2</sub> balanced in N<sub>2</sub> with 50% RH) at 20 °C.** The specific CO<sub>2</sub> uptake of the sample was then obtained as the difference between the observed CO<sub>2</sub> concentration and the expected value. The final CO<sub>2</sub> uptake shown in this figure was 0.93 mmol g<sup>-1</sup>.

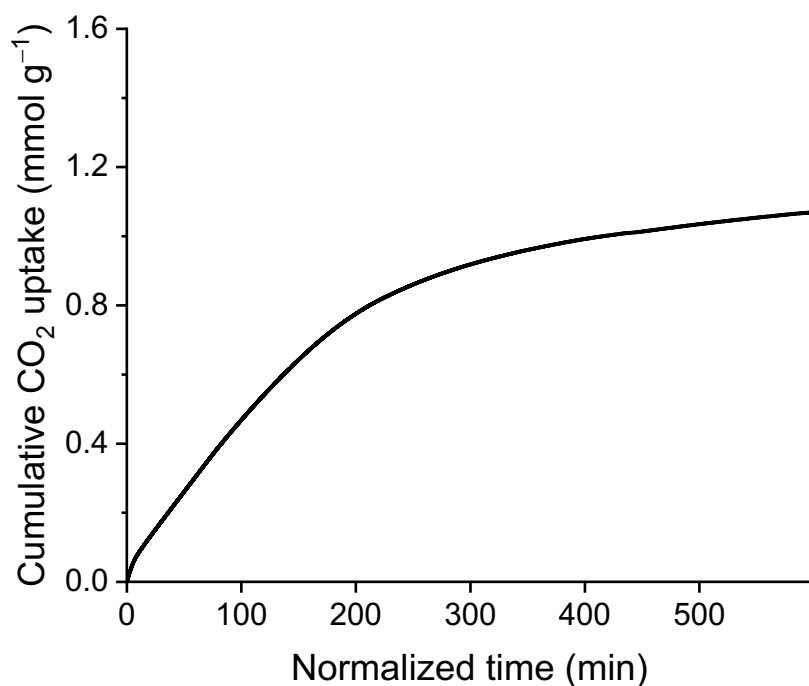

**Supplementary Fig. 21 | Cumulative CO<sub>2</sub> uptake of the KOH-WPI monomer microbead using simulated air (500 ppm of CO<sub>2</sub> balanced in N<sub>2</sub> with 50% RH) at 20 °C.** The specific CO<sub>2</sub> uptake of the sample was then obtained as the difference between the observed CO<sub>2</sub> concentration and the expected value. The final CO<sub>2</sub> uptake shown in this figure was 1.06 mmol g<sup>-1</sup>.

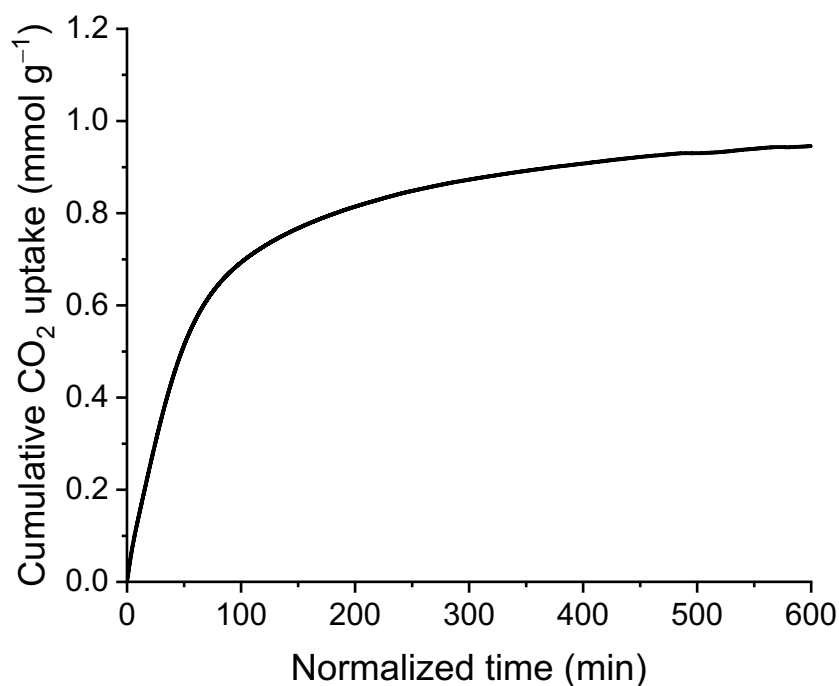

**Supplementary Fig. 22 | Cumulative CO<sub>2</sub> uptake of the KOH-CNF microbead using simulated air (500 ppm of CO<sub>2</sub> balanced in N<sub>2</sub> with 50% RH) at 20 °C.** The specific CO<sub>2</sub> uptake of the sample was then obtained as the difference between the observed CO<sub>2</sub> concentration and the expected value. The final CO<sub>2</sub> uptake shown in this figure was 0.95 mmol g<sup>-1</sup>.



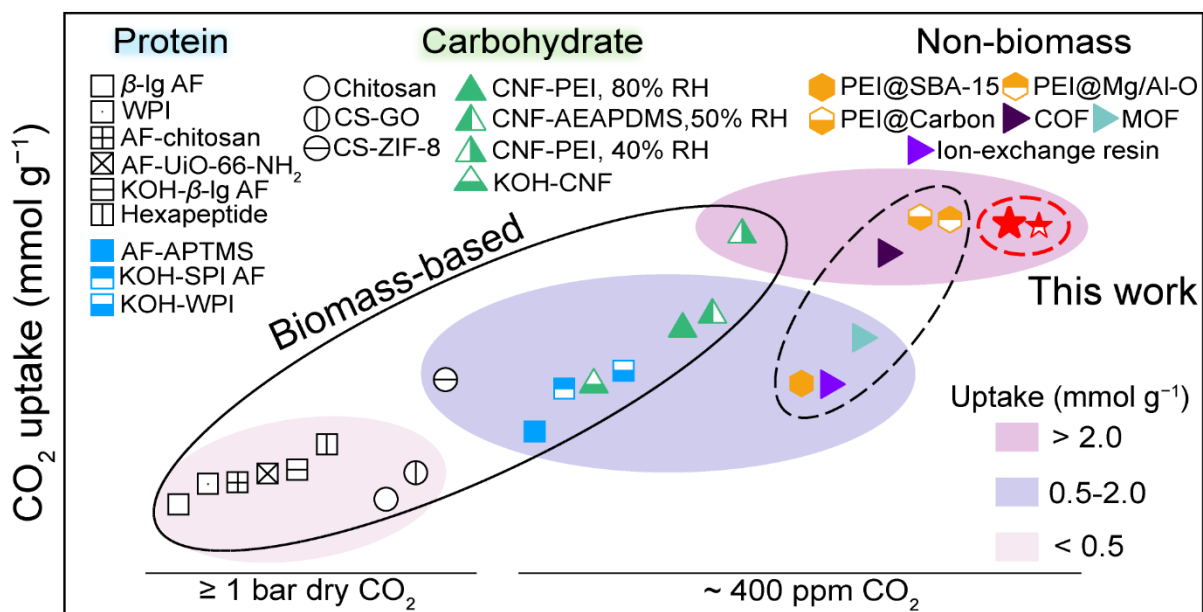

**Supplementary Fig. 23 | CO<sub>2</sub> adsorption uptake comparison of selected bio- and non-bio-based sorbents for concentrated ( $\sim 1$  bar CO<sub>2</sub>) and atmospheric CO<sub>2</sub> capture (Supplementary Tables 3–6).**

## Section 12. Detailed Sorbent Comparison for Direct Air Capture

**Supplementary Table 3** | Adsorption, desorption, and cycling properties of selected sorbents for DAC using ambient air or simulated air.

| Sorbent                                                              | CO <sub>2</sub> uptake (mmol g <sup>-1</sup> ) | Adsorption conditions |            |        |                                | Desorption condition  | Cycling Stability | Ref. |
|----------------------------------------------------------------------|------------------------------------------------|-----------------------|------------|--------|--------------------------------|-----------------------|-------------------|------|
|                                                                      |                                                | CO <sub>2</sub>       | Temp. (°C) | RH (%) | Carrier gas                    |                       |                   |      |
| Ambient air                                                          |                                                |                       |            |        |                                |                       |                   |      |
| HIPE templated p(NMe <sub>3</sub> <sup>+</sup> -MS OH <sup>-</sup> ) | 0.49                                           | Open air              | 18         | 20     | -                              | 95% RH                | 1 cycle           | 3    |
| Pickering polyHIPEs                                                  | 0.72                                           | Open air              | 18         | 20     | -                              | 95% RH                | 1 cycle           | 4    |
| Amine-based resin                                                    | 1.11                                           | Open air              | 25         | 35–60  | -                              | 100 °C<br>Water vapor | 9 cycles          | 5    |
| COF-999                                                              | 1.28                                           | Open air              | -          | -      | -                              | 60 °C                 | 100 cycles        | 6    |
| Simulated air                                                        |                                                |                       |            |        |                                |                       |                   |      |
| Charged sorbent PCS-OH                                               | 0.2                                            | 400 ppm               | 30         | 0      | N <sub>2</sub> /O <sub>2</sub> | 130 °C                | 10 cycles, stable | 7    |
| CO <sub>3</sub> <sup>2-</sup> -resin                                 | 0.26                                           | 417 ppm               | 20         | 0      | N <sub>2</sub> /O <sub>2</sub> | 95% RH                | 5 cycles, stable  | 8    |
| MOF-808-Lys                                                          | 0.70                                           | 400                   | 25         | 50     | N <sub>2</sub> /O <sub>2</sub> | 140 °C                | 10 cycles, stable | 9    |
| Amine-based anion exchange polypropylene                             | 0.98                                           | 400                   | 23         | 0.5    | N <sub>2</sub> /O <sub>2</sub> | water                 | 1 cycle           | 10   |
| MOF-74-mmene-2                                                       | 1.05                                           | 390                   | 25         | 0      | N <sub>2</sub> /O <sub>2</sub> | 150 °C                | 10 cycles, stable | 11   |
| Zn(ZnOH) <sub>4</sub> (bibta) <sub>3</sub>                           | 1.32                                           | 395                   | 25         | 0      | N <sub>2</sub> /O <sub>2</sub> | 100 °C                | 5 cycles, stable  | 12   |

**Supplementary Table 4** | Adsorption, desorption, and cycling properties of selected protein-based DAC sorbents.

| Sorbent                                            | CO <sub>2</sub> uptake<br>(mmol g <sup>-1</sup> ) | Adsorption conditions |               |        |                | Desorption<br>condition | Cycling Stability   | Ref. |
|----------------------------------------------------|---------------------------------------------------|-----------------------|---------------|--------|----------------|-------------------------|---------------------|------|
|                                                    |                                                   | CO <sub>2</sub>       | Temp.<br>(°C) | RH (%) | Carrier<br>gas |                         |                     |      |
| Protein monomer <sup>a</sup>                       |                                                   |                       |               |        |                |                         |                     |      |
| Commercial<br>Whey protein<br>isolate              | 0.091                                             | 1bar                  | 30            | 0      |                | N <sub>2</sub> ,30 °C   | 15 cycles, 20% loss | 13   |
| Spray-dried Whey<br>protein isolate<br>(130 °C)    | 0.177                                             | 1bar                  | 30            | 0      |                | N <sub>2</sub> ,30 °C   | 15 cycles, 20% loss |      |
| Spray-dried Whey<br>protein isolate<br>(170 °C)    | 0.168                                             | 1bar                  | 30            | 0      |                | N <sub>2</sub> ,30 °C   | 15 cycles, 20% loss |      |
| Protein amyloid fibril <sup>b</sup>                |                                                   |                       |               |        |                |                         |                     |      |
| Natural<br>hexapeptide<br>VQIVYK                   | 0.48                                              | 1bar                  | 37            | 100%   | N <sub>2</sub> | N <sub>2</sub> ,100°C   | 3 cycles, stable    | 14   |
| Synthesized<br>Hexapeptide<br>VQIVYKK              | 0.54                                              | 1ba                   | 37            | 100%   | N <sub>2</sub> | N <sub>2</sub> ,100°C   | 3 cycles, stable    |      |
| Synthesized<br>Hexapeptide<br>VKIVYK               | 0.74                                              | 1ba                   | 37            | 100%   | N <sub>2</sub> | N <sub>2</sub> ,100°C   | 3 cycles, stable    |      |
| APTMS-modified<br>β-Ig aerogel (1:1)               | 0.73                                              | 1bar                  | 25            | 0      | N <sub>2</sub> | N <sub>2</sub> ,150°C   | 3 cycles, stable    | 15   |
| diAPTMS-<br>modified β-Ig<br>aerogel (1:1)         | 0.85                                              | 1bar                  | 25            | 0      | N <sub>2</sub> | N <sub>2</sub> ,150°C   | 3 cycles, stable    |      |
| triAPTMS-<br>modified β-Ig<br>aerogel (1:1)        | 0.92                                              | 1bar                  | 25            | 0      | N <sub>2</sub> | N <sub>2</sub> ,150°C   | 3 cycles, stable    |      |
| triAPTMS-<br>modified β-Ig<br>aerogel (1:4)        | 1.02                                              | 1bar                  | 25            | 0      | N <sub>2</sub> | N <sub>2</sub> ,150°C   | 3 cycles, stable    |      |
| triAPTMS-<br>modified<br>lysozyme aerogel<br>(1:4) | 0.3                                               | 1bar                  | 25            | 0      | N <sub>2</sub> | N <sub>2</sub> ,150°C   | 3 cycles, stable    |      |
| triAPTMS-<br>modified black<br>bean aerogel (1:4)  | 0.41                                              | 1bar                  | 25            | 0      | N <sub>2</sub> | N <sub>2</sub> ,150°C   | 3 cycles, stable    |      |
| Low MW<br>chitosan-BLG<br>aerogel                  | 0.16                                              | 1bar                  | 25            | 0      | N <sub>2</sub> | N <sub>2</sub> ,150°C   | 3 cycles, stable    |      |
| medium MW<br>chitosan-aerogel                      | 0.18                                              | 1bar                  | 25            | 0      | N <sub>2</sub> | N <sub>2</sub> ,150°C   | 3 cycles, stable    |      |
| high MW<br>chitosan-aerogel                        | 0.41                                              | 1bar                  | 25            | 0      | N <sub>2</sub> | N <sub>2</sub> ,150°C   | 3 cycles, stable    |      |
| 30% UiO-66-NH <sub>2</sub><br>hybrid               | 0.11                                              | 1bar                  | 25            | 0      | N <sub>2</sub> | N <sub>2</sub> ,150°C   | 3 cycles, stable    | 16   |
| 40% UiO-66-NH <sub>2</sub><br>hybrid               | 0.16                                              | 1bar                  | 25            | 0      | N <sub>2</sub> | N <sub>2</sub> ,150°C   | 3 cycles, stable    |      |
| 50% UiO-66-NH <sub>2</sub><br>hybrid               | 0.25                                              | 1bar                  | 25            | 0      | N <sub>2</sub> | N <sub>2</sub> ,150°C   | 3 cycles, stable    |      |

<sup>a</sup>, Calculated from the weight increase (%) as mmol g<sup>-1</sup> monomer.

<sup>b</sup>, Breakthrough experiments and single-component isotherm results.

**Supplementary Table 5** | Adsorption, desorption, and cycling properties of selected carbohydrate-based DAC sorbents.

| Sorbent                                                   | CO <sub>2</sub> uptake (mmol g <sup>-1</sup> ) | Adsorption conditions |            |        |                | Desorption condition  | Cycling Stability     | Ref.  |
|-----------------------------------------------------------|------------------------------------------------|-----------------------|------------|--------|----------------|-----------------------|-----------------------|-------|
|                                                           |                                                | CO <sub>2</sub>       | Temp. (°C) | RH (%) | Carrier gas    |                       |                       |       |
| Carbohydrate                                              |                                                |                       |            |        |                |                       |                       |       |
| CTS/ZIF-8 composite                                       | 0.99                                           | 1 bar                 | 30         | 0      | -              | vacuum, 90 °C         | 10 cycles, 4.35% loss | 3     |
| Pure chitosan                                             | 0.05                                           | 5 bar                 | 25         | 0      | -              | -                     | -                     | 4     |
| Chitosan Grafted Graphene Oxide Aerogel                   | 0.26                                           | 1 bar                 | 25         | -      | -              | -                     | -                     | 6     |
| AEAPDMS-NFC-FD                                            | 1.39                                           | 506 ppm               | 25         | 40     | Compressed air | Ar, 90 °C             | 20 cycles, 50% loss   | 17,18 |
| Nanofibrillated Cellulose-Polyethylenimine Foams (PEI-44) | 1.55                                           | 400 ppm               | 25         | 40     | Ambient air    | N <sub>2</sub> , 85°C | 5 cycles, 3% loss     | 19    |
|                                                           | ~2.13 <sup>a</sup>                             | 400 ppm               |            | 80     | -              | -                     | -                     |       |

<sup>a</sup>, estimated from the CO<sub>2</sub> uptake curve versus humidity.

357 **Supplementary Table 6** | Adsorption, desorption, and cycling properties of selected non-  
358 biomass-based DAC sorbents.

| Sorbent                                           | CO <sub>2</sub> uptake (mmol g <sup>-1</sup> ) | Adsorption conditions |            |        |                                | Desorption condition | Cycling Stability   | Ref. |
|---------------------------------------------------|------------------------------------------------|-----------------------|------------|--------|--------------------------------|----------------------|---------------------|------|
|                                                   |                                                | CO <sub>2</sub>       | Temp. (°C) | RH (%) | Carrier gas                    |                      |                     |      |
| Amine-functionalized porous support               |                                                |                       |            |        |                                |                      |                     |      |
| PEI@SBA-15                                        | 0.96                                           | 400 ppm               | 35         | 0      | He                             | 110 °C               | 20 cycles, stable   | 20   |
| PEI@Mesoporous carbon                             | 2.25                                           | 400 ppm               | 25         | 0      | N <sub>2</sub>                 | 110 °C               | 20 cycles, stable   | 21   |
| PEI@Mg0.55Al-O                                    | 2.27                                           | 400 ppm               | 25         | 0      | N <sub>2</sub>                 | 120 °C               | 20 cycles, 14% loss | 22   |
| Covalent/Metal Organic Framework                  |                                                |                       |            |        |                                |                      |                     |      |
| Zn(ZnOH) <sub>4</sub> (bibta) <sub>3</sub>        | 1.32                                           | 395 ppm               | 25         | 0      | N <sub>2</sub> /O <sub>2</sub> | 100 °C               | 5 cycles, stable    | 12   |
| COF-999                                           | 2.02                                           | 400 ppm               | 25         | 50     | N <sub>2</sub> /O <sub>2</sub> | 60 °C                | 100 cycles, stable  | 23   |
| Ion-exchange resin                                |                                                |                       |            |        |                                |                      |                     |      |
| Amine-based anion exchange resin in polypropylene | 0.98                                           | 400 ppm               | 23         | 0.5    | N <sub>2</sub> /O <sub>2</sub> | water                | 1 cycle             | 10   |

## Section 13. Instrument for Desorption and Regeneration

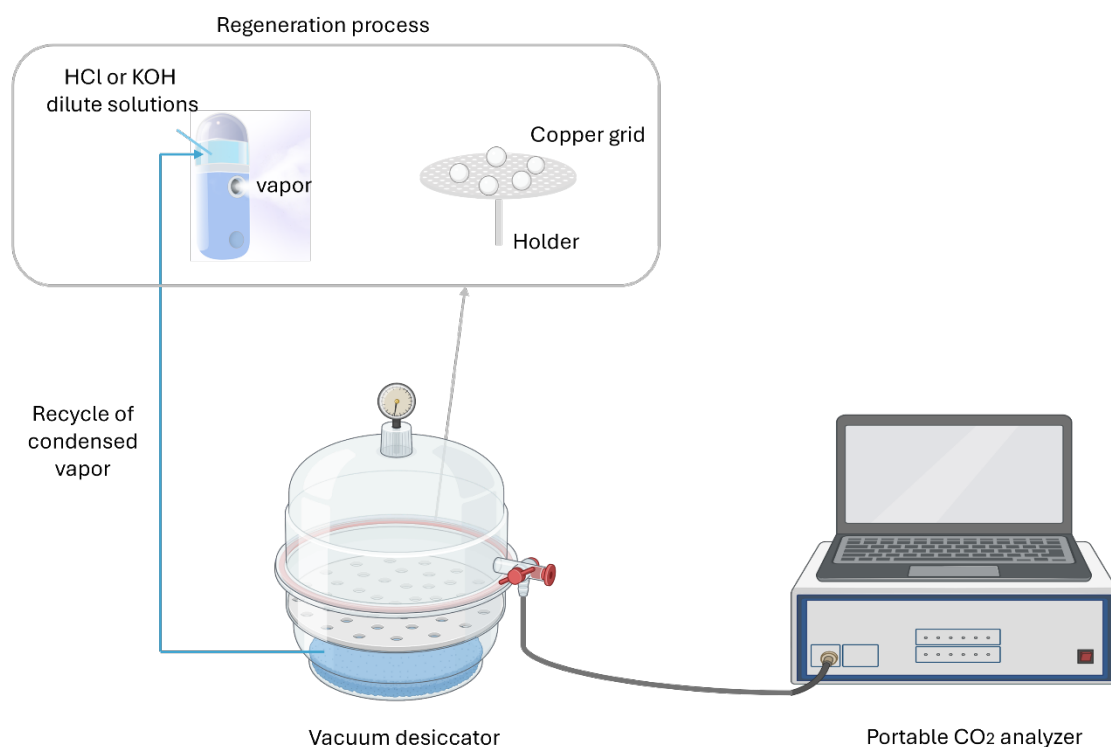

**Supplementary Fig. 24 | Schematic diagram of the desorption and regeneration instrument.** 10 ml of acid/alkaline solution was loaded into the automatic humidifier (30 ml, 3 W, 5 V) with an acidic/alkaline mist production rate of 1.25–1.45 ml/min. The CO<sub>2</sub> in the 9.3 L reactor (vacuum desiccator) was removed by purging pure N<sub>2</sub> for 30 min. After the N<sub>2</sub> purging was ceased, the mist was generated for 13–15 min. The condensation of the mist was facilitated by an ice bath around the bottom of the desiccator.

## Section 14. Dynamic Desorption and Regeneration Measurements

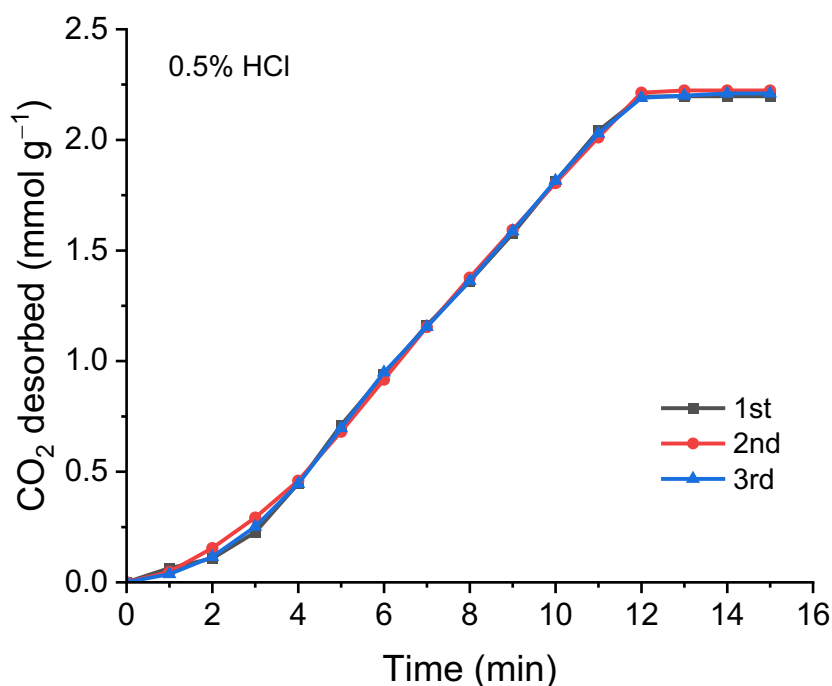

**Supplementary Fig. 25 | Dynamic desorption curves of saturated KOH-WPI AF microbeads under ambient air (~420 ppm CO<sub>2</sub>, 40–60% relative humidity, 25 °C) using 0.5% HCl solutions.** The gas inside the reactor was removed by N<sub>2</sub> purge for 30 min. The experiment was repeated three times.

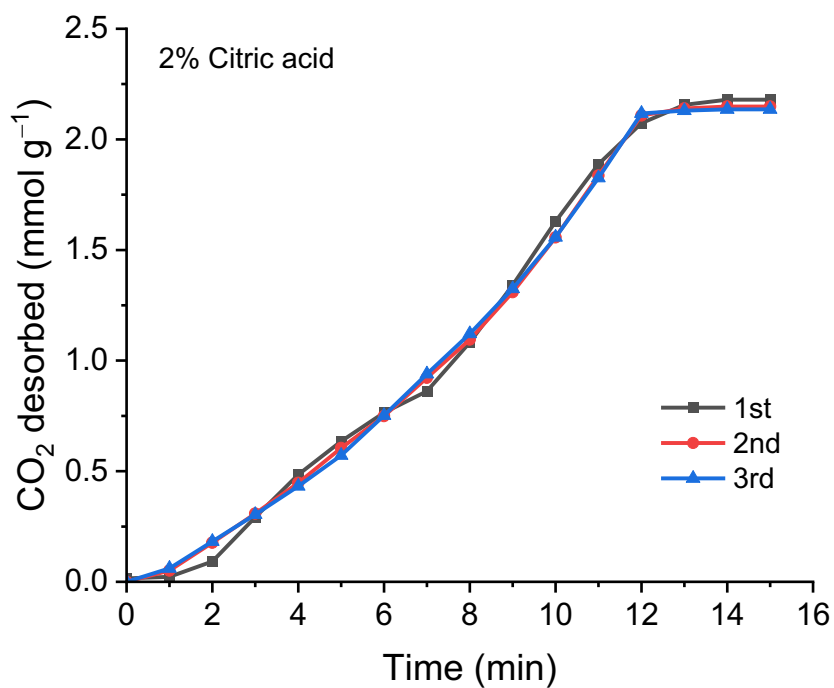

**Supplementary Fig. 26 | Dynamic desorption curves of saturated KOH-WPI AF microbeads under ambient air (~420 ppm CO<sub>2</sub>, 40–60% relative humidity, 25 °C) using 2% citric acid solutions.** The gas inside the reactor was removed by N<sub>2</sub> purge for 30 min. The experiment was repeated three times.



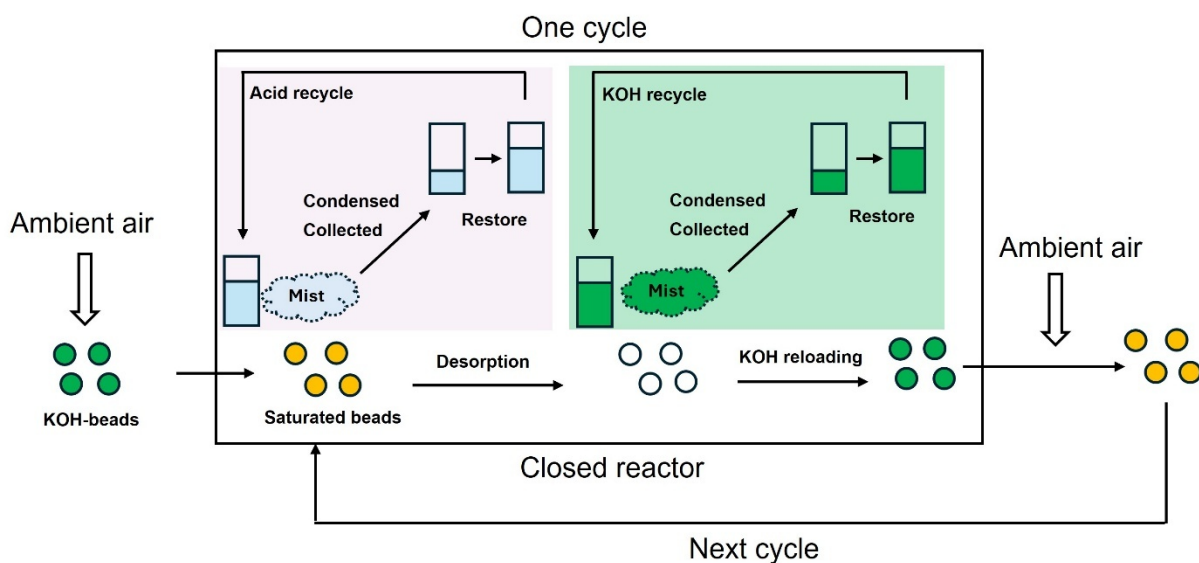

**Supplementary Fig. 27 | A schematic of the acid-alkali mist regeneration cycle.** KOH-WPI AF microbeads were saturated by ambient air (~420 ppm CO<sub>2</sub>, 40–60% relative humidity, 25 °C) for 12–14 h. The acid or alkaline mist was collected by condensation and then restored to the initial value by adding fresh solutions in the humidifier. The desorption and regeneration process is continuous without any sample drying.

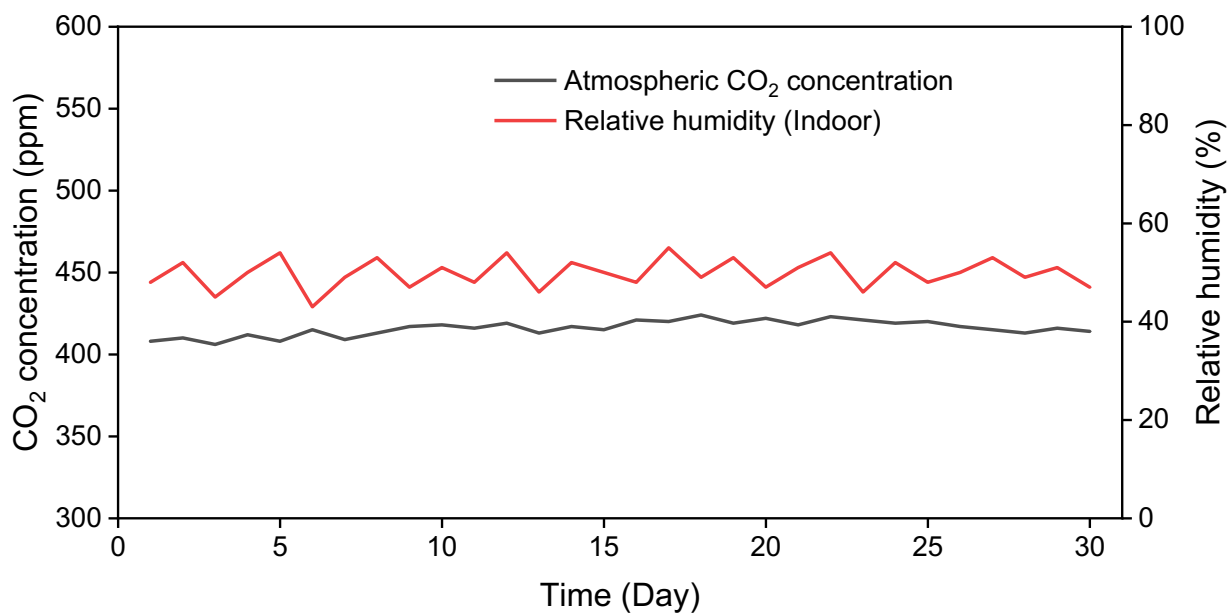

**Supplementary Fig. 28 | Atmospheric CO<sub>2</sub> concentration (black) and RH (red) for 30 continuous days of operation using ambient air in Zürich, Switzerland.**

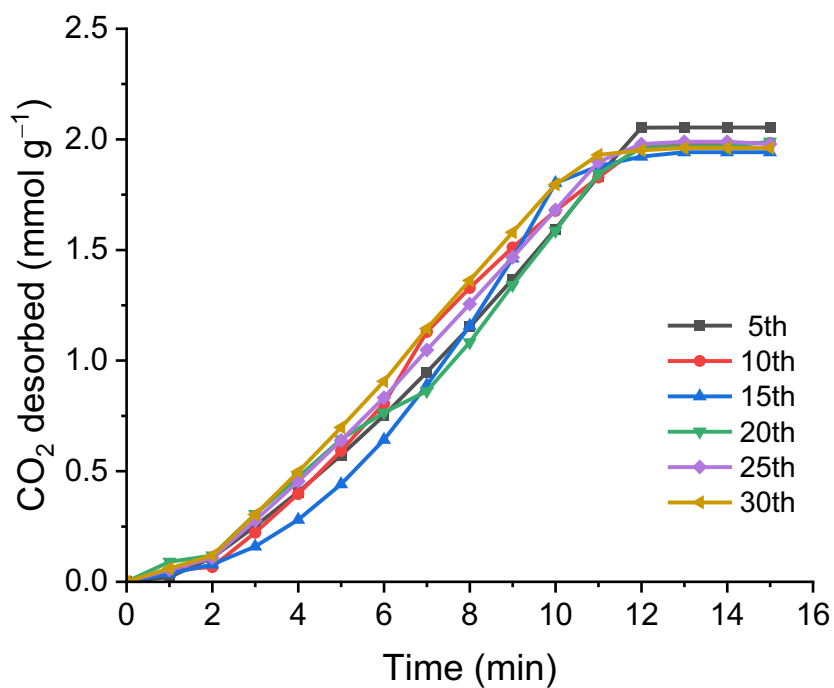

**Supplementary Fig. 29 | Dynamic desorption curves of KOH-WPI AF microbeads saturated by ambient air (~420 ppm CO<sub>2</sub>, 40–60% relative humidity, 25 °C) after 5th, 10th, 15th, 20th, 25th, and 30th regeneration using 0.5% HCl solutions.**

**Supplementary Table 7 | The mist consumption of 0.5% HCl and 0.5% KOH during 30 cycles.** The condensed HCl or KOH mist was collected and weighed, and the consumption was calculated from the difference in weight from the initial value (~10 g) for each cycle. The density of 0.5% HCl and 0.5 % KOH at room temperature was assumed to be 1.002 g ml<sup>-1</sup> and 1.005 g ml<sup>-1</sup>, respectively.

| Cycle | HCl solution final weight (g) | HCl solution consumption (g) | KOH solution final weight (g) | KOH solution consumption (g) |
|-------|-------------------------------|------------------------------|-------------------------------|------------------------------|
| 0     | 10.071                        |                              | 10.050                        |                              |
| 1     | 8.168                         | 1.903                        | 8.193                         | 1.857                        |
| 2     | 8.084                         | 1.987                        | 8.969                         | 1.081                        |
| 3     | 8.452                         | 1.619                        | 8.745                         | 1.305                        |
| 4     | 8.355                         | 1.716                        | 8.452                         | 1.598                        |
| 5     | 8.095                         | 1.976                        | 8.496                         | 1.554                        |
| 6     | 8.258                         | 1.813                        | 8.78                          | 1.27                         |
| 7     | 8.37                          | 1.701                        | 8.039                         | 2.011                        |
| 8     | 8.417                         | 1.654                        | 8.6                           | 1.45                         |
| 9     | 8.382                         | 1.689                        | 8.6                           | 1.45                         |
| 10    | 8.256                         | 1.815                        | 8.935                         | 1.115                        |
| 11    | 8.096                         | 1.975                        | 8.079                         | 1.971                        |
| 12    | 8.126                         | 1.945                        | 8.501                         | 1.549                        |
| 13    | 8.468                         | 1.603                        | 8.895                         | 1.155                        |
| 14    | 8.165                         | 1.906                        | 8.857                         | 1.193                        |
| 15    | 8.262                         | 1.809                        | 8.422                         | 1.628                        |
| 16    | 8.234                         | 1.837                        | 9.011                         | 1.039                        |
| 17    | 8.2                           | 1.871                        | 8.684                         | 1.366                        |
| 18    | 8.481                         | 1.59                         | 8.708                         | 1.342                        |
| 19    | 8.348                         | 1.723                        | 8.69                          | 1.36                         |
| 20    | 8.462                         | 1.609                        | 8.553                         | 1.497                        |
| 21    | 8.355                         | 1.716                        | 8.398                         | 1.652                        |
| 22    | 8.431                         | 1.64                         | 8.934                         | 1.116                        |
| 23    | 8.361                         | 1.71                         | 8.829                         | 1.221                        |
| 24    | 8.1                           | 1.971                        | 9.006                         | 1.044                        |
| 25    | 8.01                          | 2.061                        | 8.041                         | 2.009                        |
| 26    | 8.468                         | 1.603                        | 8.226                         | 1.824                        |
| 27    | 8.181                         | 1.89                         | 8.76                          | 1.29                         |
| 28    | 8.456                         | 1.615                        | 8.115                         | 1.935                        |
| 29    | 8.232                         | 1.839                        | 8.557                         | 1.493                        |
| 30    | 8.462                         | 1.609                        | 8.432                         | 1.618                        |

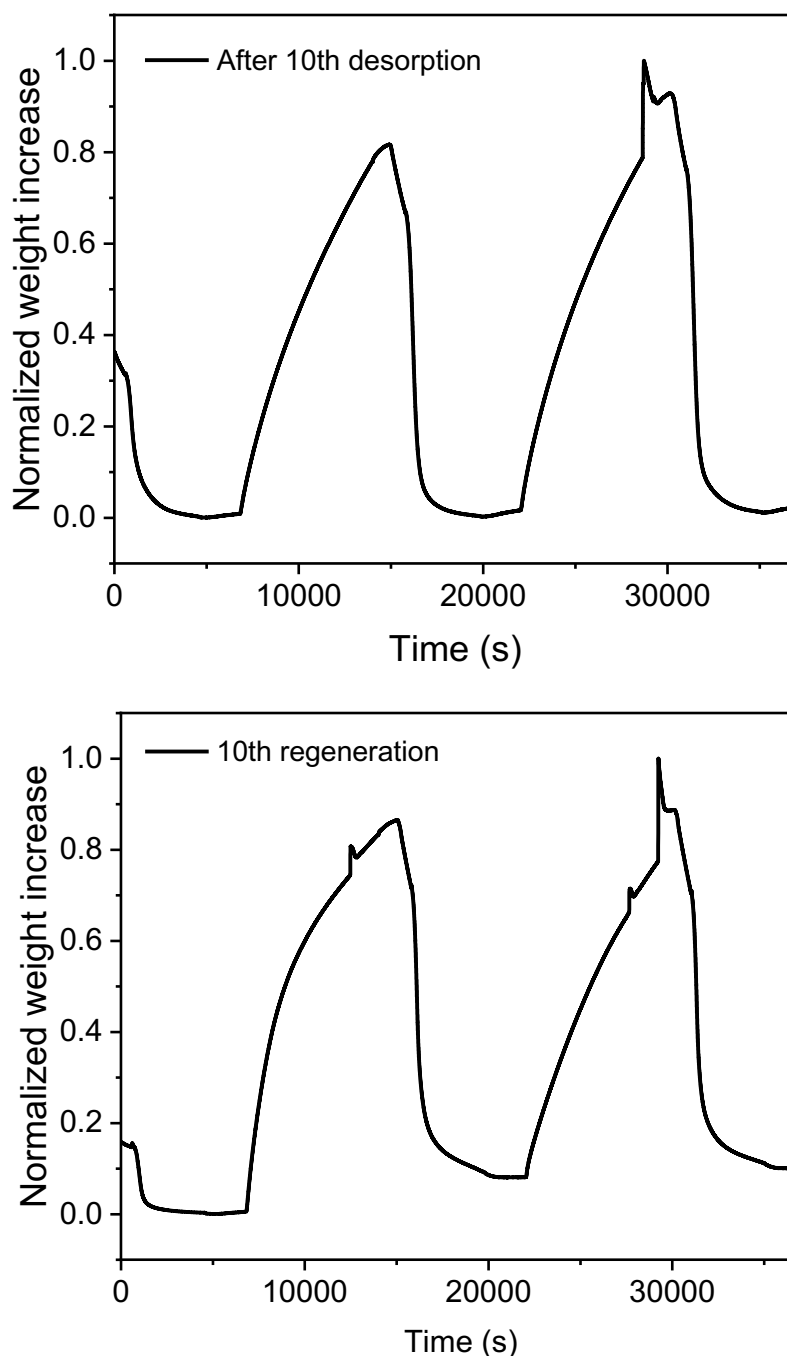

427 **Supplementary Fig. 30 | TGA curves of desorbed and regenerated KOH-WPI AF**  
 428 **microbeads (10th) using compressed air (~420 ppm of CO<sub>2</sub>, ~21% O<sub>2</sub>, balanced in N<sub>2</sub>) with**  
 429 **55% RH at 20 °C. Before the actual CO<sub>2</sub> adsorption measurements, the samples were degassed**  
 430 **at 150 °C in N<sub>2</sub> for 30 min. CO<sub>2</sub> was then desorbed by pure N<sub>2</sub>, heated to 120 °C at a rate of**  
 431 **10 °C per min, and held at this temperature for 30 min.**

432

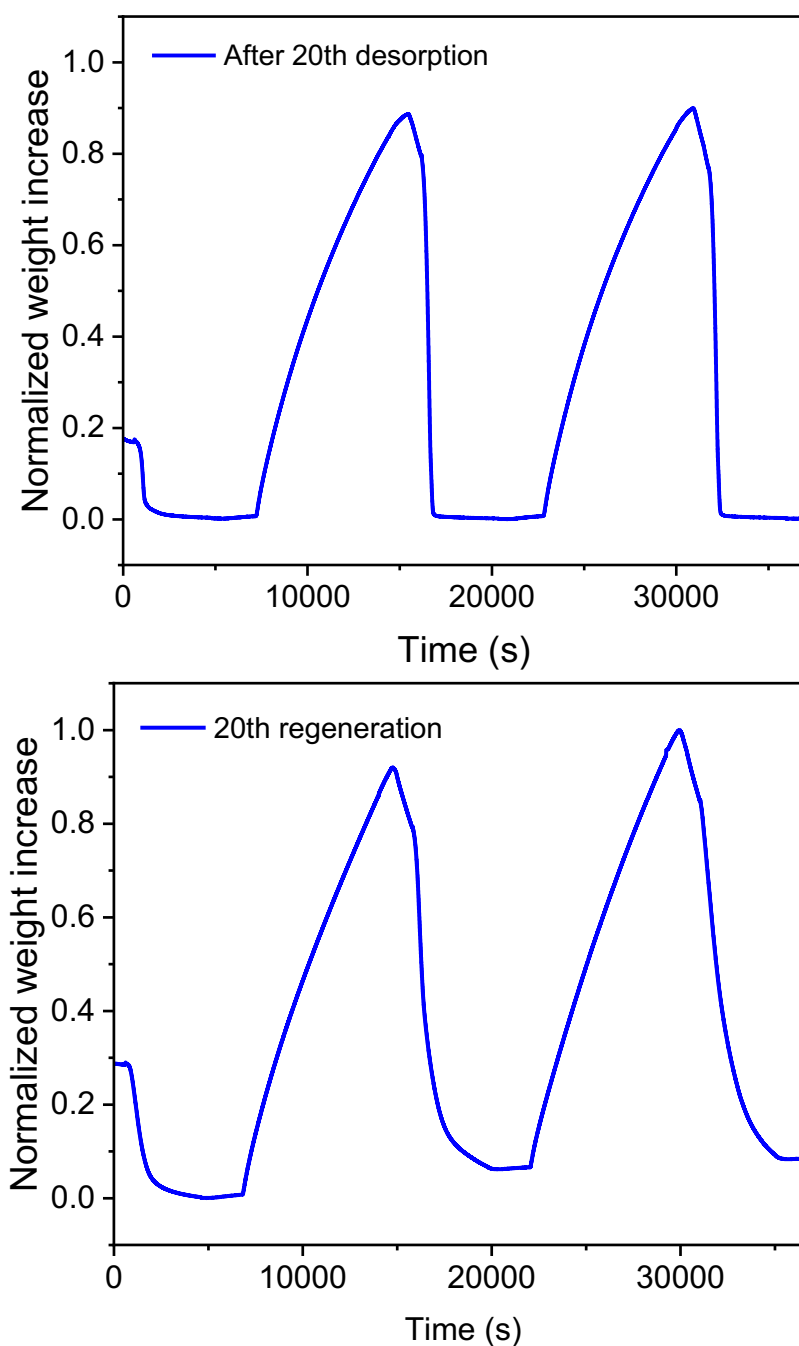

434 **Supplementary Fig. 31 | TGA curves of desorbed and regenerated KOH-WPI AF**  
 435 **microbeads (20th) using compressed air (~420 ppm of CO<sub>2</sub>, ~21% O<sub>2</sub>, balanced in N<sub>2</sub>) with**  
 436 **55% RH at 20 °C.** Before the actual CO<sub>2</sub> adsorption measurements, the samples were degassed  
 437 at 150 °C in N<sub>2</sub> for 30 min. CO<sub>2</sub> was then desorbed using pure N<sub>2</sub>, heated to 120 °C at a rate  
 438 of 10 °C per min, and held at this temperature for 30 min.

439

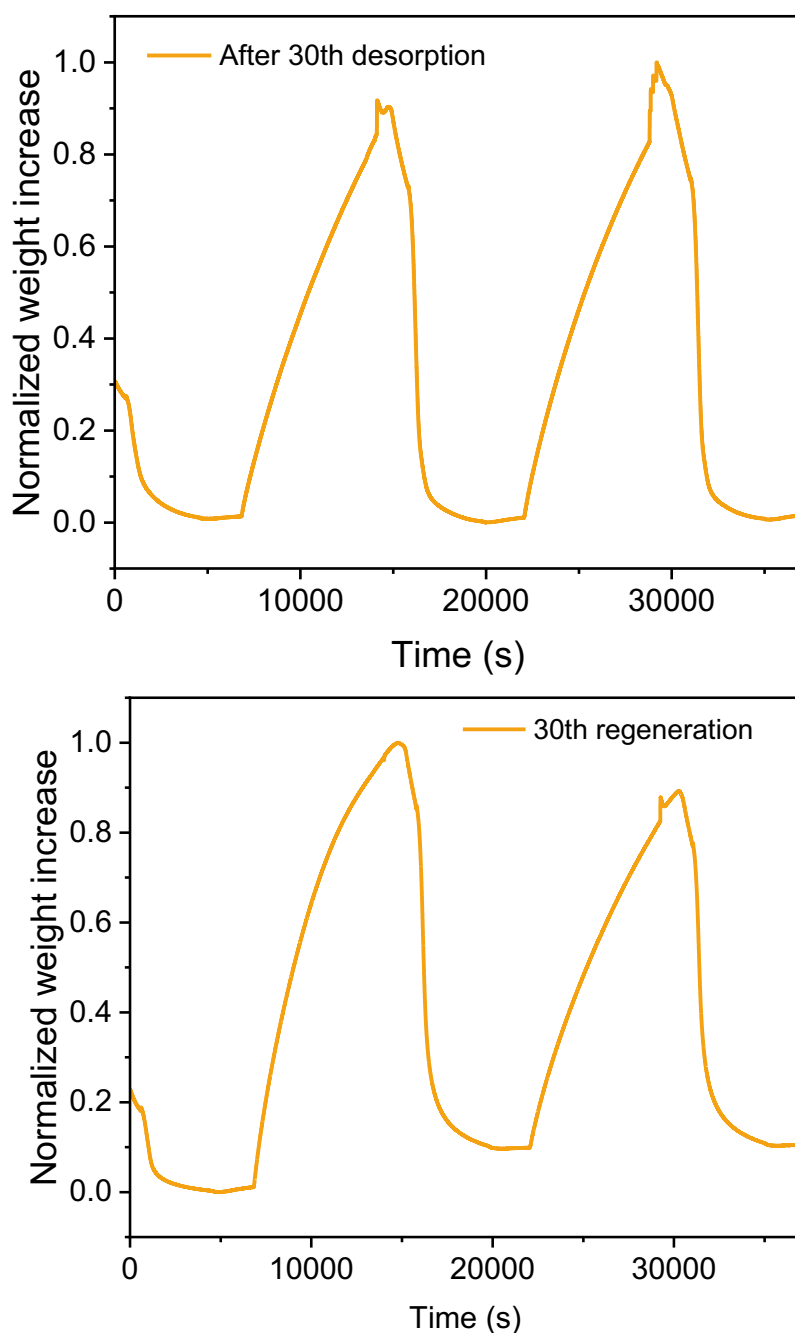

440 **Supplementary Fig. 32 | TGA curves of desorbed and regenerated KOH-WPI AF**  
 441 **microbeads (30th) using compressed air (~420 ppm of CO<sub>2</sub>, ~21% O<sub>2</sub>, balanced in N<sub>2</sub>) with**  
 442 **55% RH at 20 °C.** Before the actual CO<sub>2</sub> adsorption measurements, the samples were degassed  
 443 at 150 °C in N<sub>2</sub> for 30 min. CO<sub>2</sub> was then desorbed by pure N<sub>2</sub>, heated to 120 °C at a rate of  
 444 10 °C per min, and held at this temperature for 30 min.

## Section 16. Density Functional Theory (DFT) Calculations

### Carbamate pathway

**Supplementary Table 8 | Reaction 1.**  $\epsilon$ -amino group of a single Lys residue (Lys-NH<sub>2</sub>) attacks the CO<sub>2</sub> molecule, forms a transition state-1 (TS-1), and finally becomes intermediate-1 (Int-1): Lys-NH<sub>2</sub><sup>+</sup>COO<sup>-</sup>.

| Name               | Pathway                                                                           | Delta G (kJ mol <sup>-1</sup> ) |
|--------------------|-----------------------------------------------------------------------------------|---------------------------------|
| Initial state      | 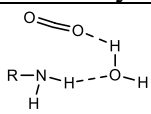 | 0                               |
| Transition state-1 |  | 24.9                            |
| Intermediate-1     | R-NH <sub>2</sub> <sup>+</sup> COO <sup>-</sup> + H <sub>2</sub> O                | -31.2                           |

**Supplementary Table 9 | Reaction 1-1.** Int-1 undergoes proton rearrangement through the hydrogen bond with water, forms another transition state (TS-1-1), and finally becomes Lys-RNHCOOH.

| Name                 | Pathway                                                                             | Delta G (kJ mol <sup>-1</sup> ) |
|----------------------|-------------------------------------------------------------------------------------|---------------------------------|
| Intermediate-1       | R-NH <sub>2</sub> <sup>+</sup> COO <sup>-</sup> + H <sub>2</sub> O                  | 0                               |
| Transition state-1-1 | 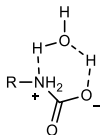 | 43.6                            |
| Product              | R-NHCOOH + H <sub>2</sub> O                                                         | -68.9                           |

**Supplementary Table 10 | Reaction 2.** Proton transfer occurs between the Int-1 and the hydroxide ion, which is a barrier-free reaction (strong base to weak base).

| Name          | Pathway                                                                             | Delta G (kJ mol <sup>-1</sup> ) |
|---------------|-------------------------------------------------------------------------------------|---------------------------------|
| Initial state | R-NH <sub>2</sub> <sup>+</sup> COO <sup>-</sup> + OH <sup>-</sup>                   | 0                               |
| Product       | 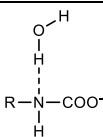 | -133.9                          |

**Supplementary Table 11 | Reaction 3.** Proton transfer occurs between the Int-1 and the carbonate (stronger base than  $\epsilon$ -amino group).

| Name          | Pathway                                                                             | Delta G (kJ mol <sup>-1</sup> ) |
|---------------|-------------------------------------------------------------------------------------|---------------------------------|
| Initial state | R-NH <sub>2</sub> <sup>+</sup> COO <sup>-</sup> + CO <sub>3</sub> <sup>2-</sup>     | 0                               |
| Product       | 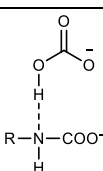 | -103.0                          |



460

**Bicarbonate pathway**

461

**Supplementary Table 12 | Reaction 4.** The  $\Delta G$  value is positive, indicating that the reaction is non-spontaneous and requires external energy, and is not driven by entropy alone.

462

| Name             | Pathway                                                                           | Delta G (kJ mol <sup>-1</sup> ) |
|------------------|-----------------------------------------------------------------------------------|---------------------------------|
| Initial state    | 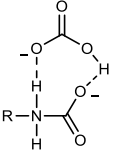 | 0                               |
| Transition state |  | -10.4                           |
| Product          |  | 7.4                             |

463

464

**Supplementary Table 13 | Reaction 5.** The  $\epsilon$ -amino group acts as a hydrogen acceptor, catalyzing the reaction between hydroxide ion and CO<sub>2</sub> to form a hydrogen-bonded bicarbonate complex.

465

466

| Name          | Pathway                                                                             | Delta G (kJ mol <sup>-1</sup> ) |
|---------------|-------------------------------------------------------------------------------------|---------------------------------|
| Initial state | $R-NH_2 + OH^- + CO_2$                                                              | 0                               |
| Product       | 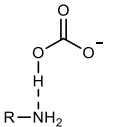 | -160.3                          |

467

468

**Supplementary Table 14 | Reaction 6.** Water transfers a proton to the ε-amino group, resulting in a hydroxide ion, which subsequently attacks the CO<sub>2</sub>, forming transition state 3 (TS-3). The final product is the bicarbonate-ammonium complex.

| Name             | Pathway                                                                           | Delta G (kJ mol <sup>-1</sup> ) |
|------------------|-----------------------------------------------------------------------------------|---------------------------------|
| Initial state    | 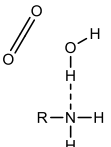 | 0                               |
| Transition state |  | 41.3                            |
| Product          |  | -72.8                           |

**Supplementary Table 15 | Reaction 7.** Ammonium ions form hydrogen bond complexes with water, which prevent water from reacting with CO<sub>2</sub>.

| Name          | Pathway                                                                             | Delta G (kJ mol <sup>-1</sup> ) |
|---------------|-------------------------------------------------------------------------------------|---------------------------------|
| Initial state | R-NH <sub>2</sub> + OH <sup>-</sup> + CO <sub>2</sub>                               | 0                               |
| Product       | 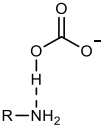 | -19.5                           |

**Supplementary Table 16 | Reaction 8.** Hydroxide ion attacks the CO<sub>2</sub> to form bicarbonate.

| Name          | Pathway                           | Delta G (kJ mol <sup>-1</sup> ) |
|---------------|-----------------------------------|---------------------------------|
| Initial state | OH <sup>-</sup> + CO <sub>2</sub> | 0                               |
| Product       | HCO <sub>3</sub> <sup>-</sup>     | -127.2                          |

**Supplementary Table 17 | Reaction 9.** Carbonate reacts with CO<sub>2</sub> and water to form bicarbonate.

| Name          | Pathway                                                            | Delta G (kJ mol <sup>-1</sup> ) |
|---------------|--------------------------------------------------------------------|---------------------------------|
| Initial state | CO <sub>2</sub> + CO <sub>3</sub> <sup>2-</sup> + H <sub>2</sub> O | 0                               |
| Product       | HCO <sub>3</sub> <sup>-</sup>                                      | -75.35                          |

482 **Supplementary Table 18 | Reaction 10.** The dicarbonate and ammonium ions undergo proton  
483 transfer, and the dicarbonate decomposes to produce bicarbonate and carbon dioxide.

| Name          | Pathway                                                                                                       | Delta G (kJ mol <sup>-1</sup> ) |
|---------------|---------------------------------------------------------------------------------------------------------------|---------------------------------|
| Initial state | $\text{R-NH}_3^+ + \text{O}=\text{C}(\text{O}^-)=\text{O}=\text{C}(\text{O}^-)=\text{O} + \text{H}_2\text{O}$ | 0                               |
| Product       | $\text{R-NH}_2 + \text{CO}_2 + \text{HCO}_3^- + \text{H}_2\text{O}$                                           | 23.9                            |

484

485

### Geometric constraints on the carbamate pathway

**Supplementary Table 19 | Reaction 11.** Due to the fixed 4–5 Å spacing between two Lys ε-amino groups within the fibril stack, water acts as a bridge for proton transfer, forming transition state-4 (TS-4) and finally becomes intermediate-4 (Int-4). Protons from Int-4 transfer preferentially to hydroxide, bicarbonate, or carbonate rather than to adjacent Lys residues.

| Name             | Pathway                                                                                                                                                                | Delta G (kJ/mol) |
|------------------|------------------------------------------------------------------------------------------------------------------------------------------------------------------------|------------------|
| Initial state    | $  \begin{array}{c}  \text{R}-\text{NH}^+\text{COO}^- \\    \\  \text{H} \\    \\  \text{O}-\text{H} \\    \\  \text{H} \\    \\  \text{R}-\text{NH}_2  \end{array}  $ | 0                |
| Transition state | $  \begin{array}{c}  \text{R}-\text{NH}^+\text{COO}^- \\    \\  \text{H} \\    \\  \text{O}-\text{H} \\    \\  \text{H} \\    \\  \text{R}-\text{NH}_2  \end{array}  $ | 9.6              |
| Product          | $  \begin{array}{c}  \text{R}-\text{NHCOO}^- \\    \\  \text{H} \\    \\  \text{O}-\text{H} \\    \\  \text{H} \\    \\  \text{R}-\text{NH}_2^+  \end{array}  $        | −35.4            |

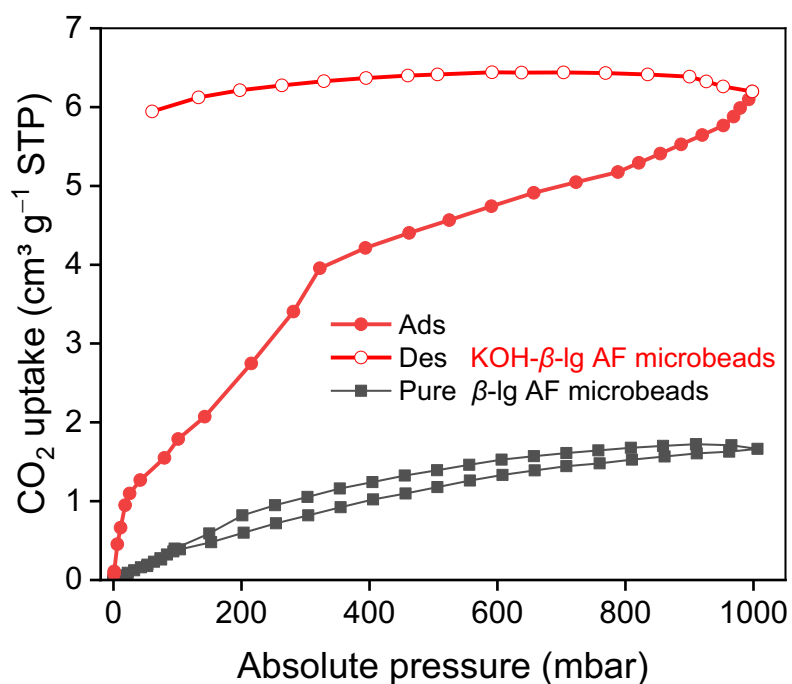

**Supplementary Fig. 33 | Single-component CO<sub>2</sub> sorption isotherms of KOH-β-Ig AF microbead measured at 298 K.** Before the measurements, the samples were degassed by N<sub>2</sub> under vacuum for 5 h at 150 °C. The CO<sub>2</sub> capacity for pure (black curve) and KOH-modified (red curve) β-Ig AF microbead is 0.08 mmol g<sup>-1</sup> and 0.29 mmol g<sup>-1</sup> at 1 bar, respectively.

Section 18. *In situ* Diffuse Reflectance Infrared Fourier Transform Spectroscopy (DRIFTS)

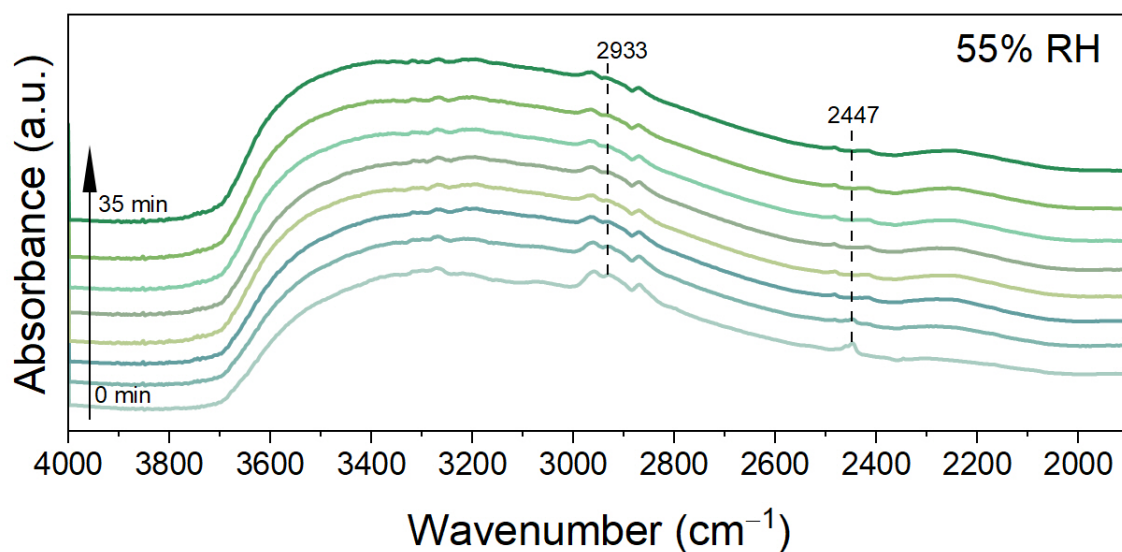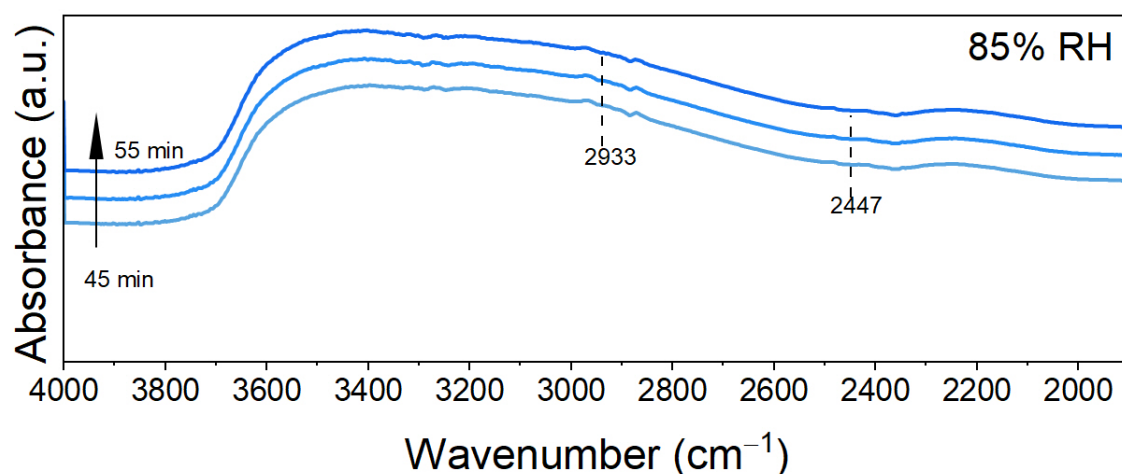

**Supplementary Fig. 34 | Time-resolved *in situ* DRIFTS spectroscopy (4000  $\text{cm}^{-1}$  to 1900  $\text{cm}^{-1}$ ) of KOH- $\beta$ -lg AF microbead under compressed air (purified ambient air,  $\sim 420$  ppm  $\text{CO}_2$ ) at 25  $^{\circ}\text{C}$  with 55% RH (up) and 85% RH (down). The measurement interval for each spectrum is 5 min. Before the actual  $\text{CO}_2$  adsorption measurements, the samples were degassed at 120  $^{\circ}\text{C}$  in  $\text{N}_2$  for 30 min.**

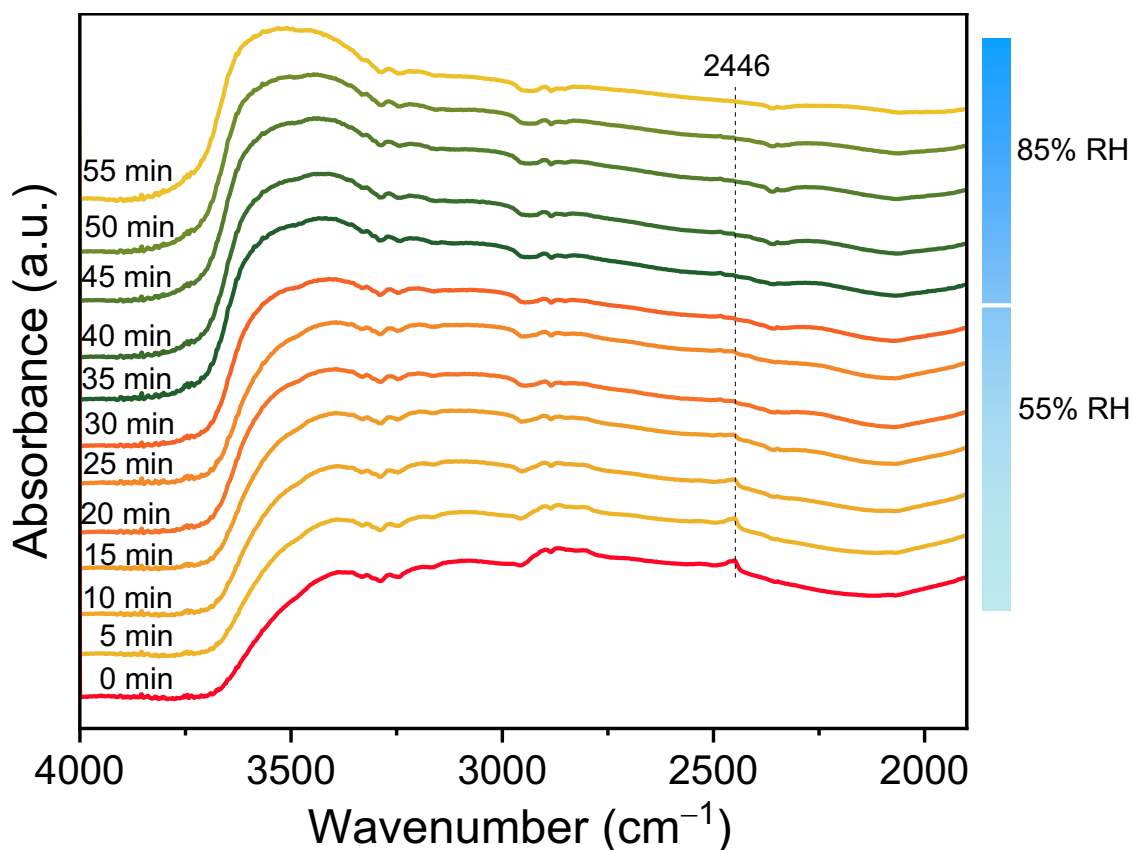

**Supplementary Fig. 35 | Time-resolved *in situ* DRIFTS spectroscopy (4000  $\text{cm}^{-1}$  to 1900  $\text{cm}^{-1}$ ) of KOH-CNF microbead under compressed air (purified ambient air,  $\sim 420$  ppm of  $\text{CO}_2$ ) at 25  $^{\circ}\text{C}$  under 55% RH and 85% RH. The measurement interval for each spectrum is 5 min. Before the actual  $\text{CO}_2$  adsorption measurements, the samples were degassed at 120  $^{\circ}\text{C}$  in  $\text{N}_2$  for 30 min.**

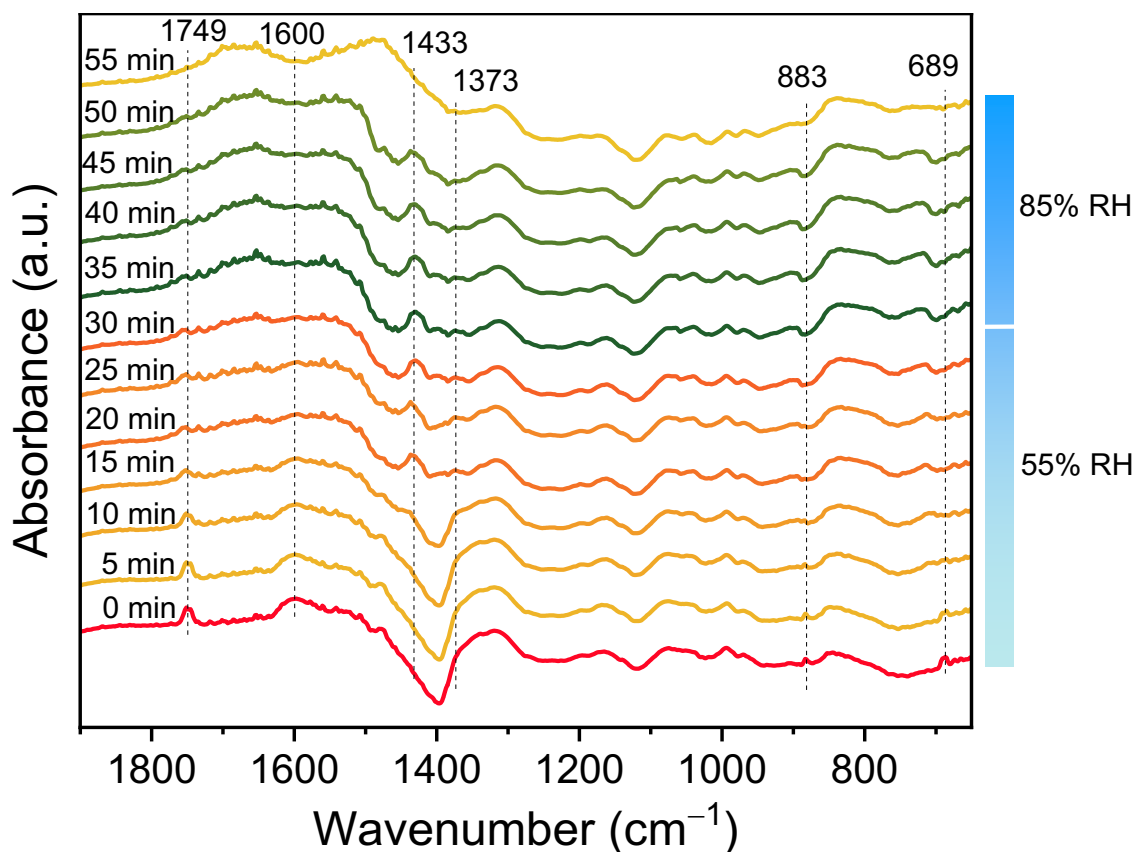

**Supplementary Fig. 36 | Time-resolved *in situ* DRIFTS spectroscopy (1900  $\text{cm}^{-1}$  to 650  $\text{cm}^{-1}$ ) of KOH-CNF microbead under compressed air (purified ambient air,  $\sim 420$  ppm of  $\text{CO}_2$ ) at 25  $^{\circ}\text{C}$  under 55% RH and 85% RH. The measurement interval for each spectrum is 5 min. Before the actual  $\text{CO}_2$  adsorption measurements, the samples were degassed at 120  $^{\circ}\text{C}$  in  $\text{N}_2$  for 30 min.**



## Section 19. Powder X-ray Diffraction (PXRD)

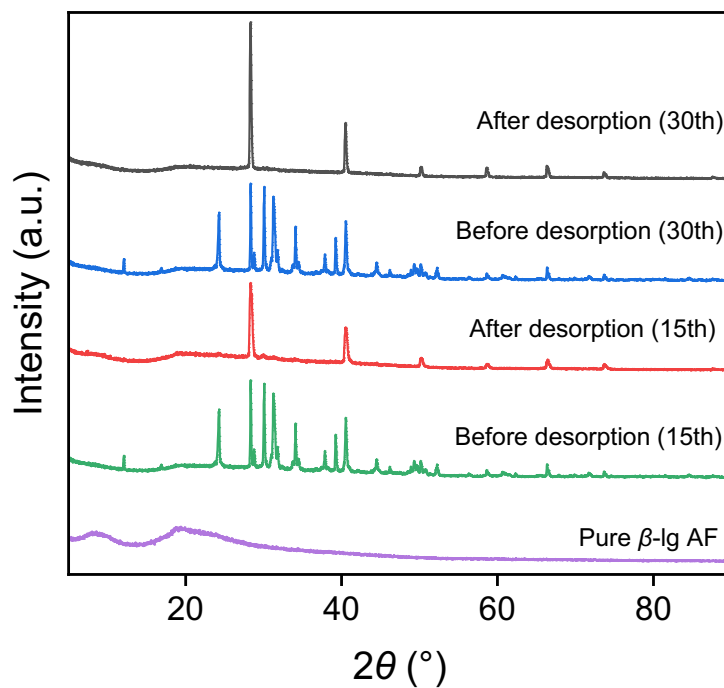

**Supplementary Fig. 37 | PXRD patterns of KOH-WPI AF microbead after 15 and 30 cycles.** The intensity values along the Y-axis were normalized for comparison.

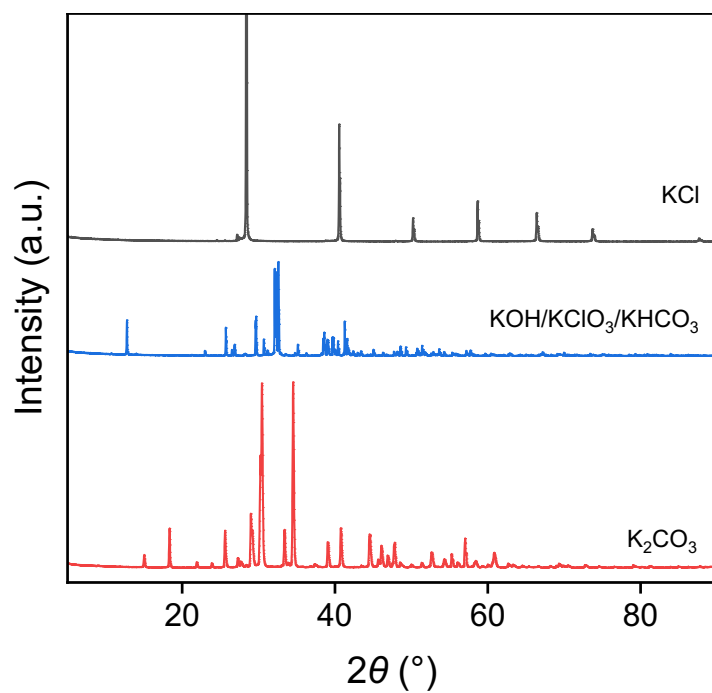

**Supplementary Fig. 38 | PXRD patterns of the reference materials KCl, KHCO<sub>3</sub>, and K<sub>2</sub>CO<sub>3</sub>.** The intensity values along the Y-axis were normalized for comparison.

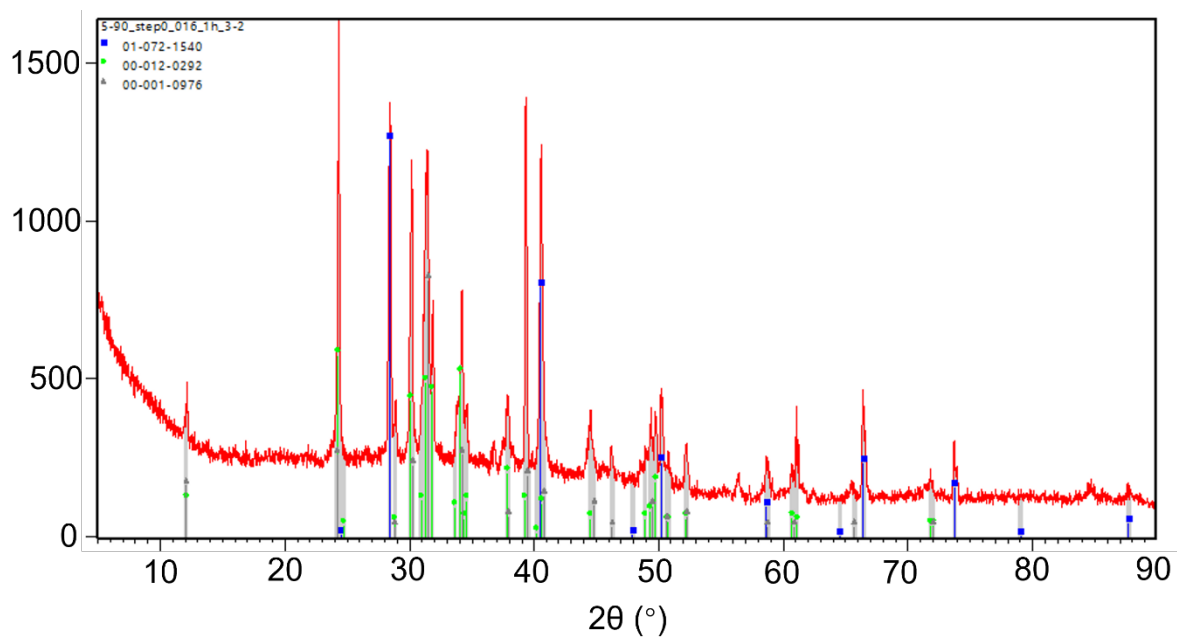

| Visible | Ref. Code   | Score | Compound Name                | Displ. (°2θ) | Scale Fac. | Chem. Formula     |
|---------|-------------|-------|------------------------------|--------------|------------|-------------------|
| 1       | 01-072-1540 | 66    | Potassium Chloride           | 0.000        | 0.765      | KCl               |
| 2       | 00-012-0292 | 80    | Potassium Hydrogen Carbonate | 0.000        | 0.349      | KHCO <sub>3</sub> |
| 3       | 00-001-0976 | 51    | Potassium Hydrogen Carbonate | 0.000        | 0.495      | KHCO <sub>3</sub> |

**Supplementary Fig. 39 and Supplementary Table 20 | PXRD pattern analysis of the KOH-WPI AF microbeads before desorption (15th) according to the ICSD database.**

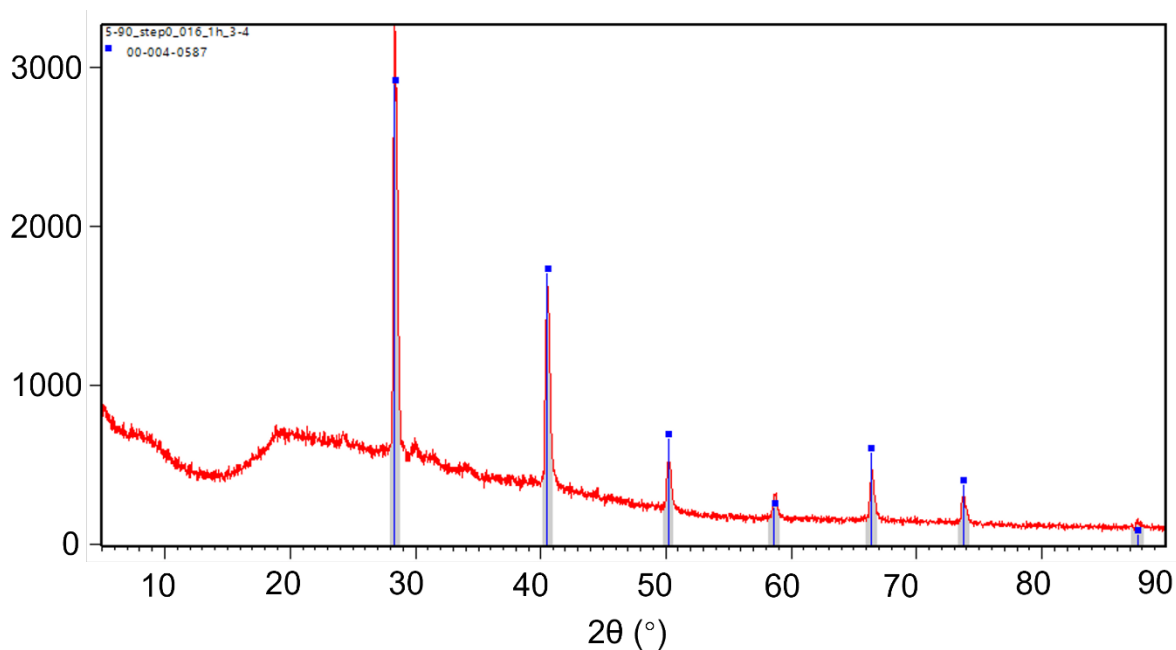

| Visible | Ref. Code   | Score | Compound Name      | Displ.(° $2\theta$ ) | Scale Fac. | Chem. Formula |
|---------|-------------|-------|--------------------|----------------------|------------|---------------|
| 1       | 00-004-0587 | 81    | Potassium Chloride | 0.000                | 0.882      | KCl           |

**Supplementary Fig. 40 and Supplementary Table 21 | PXRD pattern analysis of the KOH-WPI AF microbeads after desorption (15th) according to the ICSD database.**

## Section 20. Molecular Dynamics (MD) Calculations

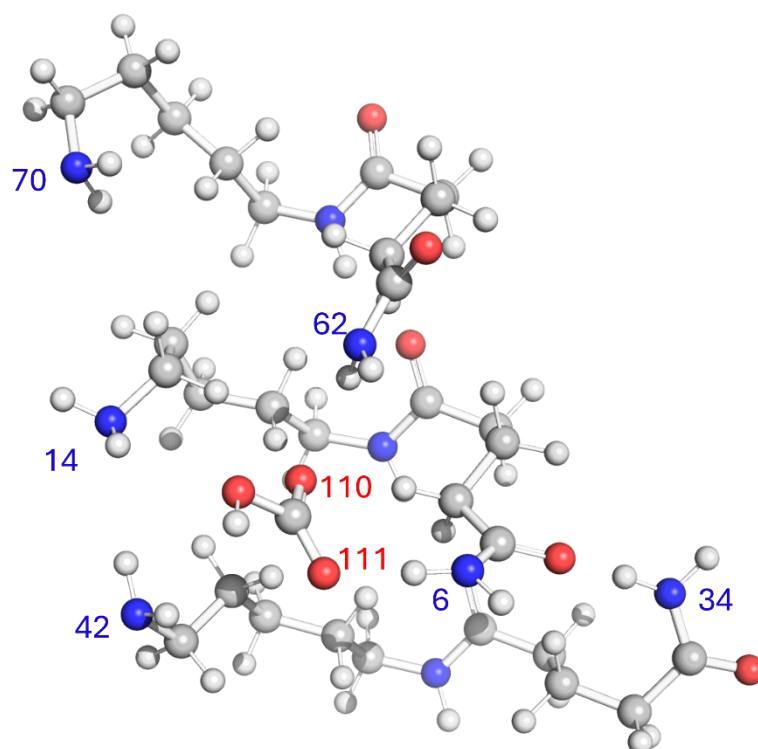

**Supplementary Fig. 41 | Selected three-layer molecular model containing adjacent Lys and Gln residues in each layer for MD simulation.** The oxygen of the carbonyl group is marked 110; the oxygen of the hydroxyl group is marked 111; the hydrogen of the amide group in Gln is marked 6. The red sphere is a carbon atom, the blue sphere is a nitrogen atom, the gray sphere is an oxygen atom, and the white sphere is a hydrogen atom.

**Supplementary Table 22 | Hydrogen bond information between the carbonyl oxygen (O<sub>110</sub>-carbonyl) and hydrogen of amine and amide groups of Lys and Gln, within 1 ns simulation time at 298 K.**

| H Donor | H Acceptor | Frequency | Avg. Distance (Å) | Avg. Angle (°) |
|---------|------------|-----------|-------------------|----------------|
| 3       | 110        | 0.001     | 3.28              | 154.08         |
| 40      | 110        | 0.027     | 3.263             | 159.93         |
| 4       | 110        | 0.089     | 3.25              | 160.188        |
| 42      | 110        | 0.026     | 3.14              | 160.163        |
| 59      | 110        | 0.002     | 3.254             | 160.87         |
| 6       | 110        | 0.413     | 2.79              | 164.285        |
| 62      | 110        | 0.06      | 2.848             | 160.792        |
| 10      | 110        | 0.092     | 3.256             | 158.641        |
| 11      | 110        | 0.001     | 3.33              | 156.923        |
| 64      | 110        | 0         | 3.151             | 156.702        |
| 12      | 110        | 0.11      | 3.275             | 161.437        |
| 13      | 110        | 0.005     | 3.273             | 161.812        |
| 66      | 110        | 0.001     | 3.326             | 162.38         |
| 67      | 110        | 0.001     | 3.262             | 161.622        |
| 14      | 110        | 0.029     | 3.108             | 161.317        |
| 68      | 110        | 0         | 3.396             | 150.695        |
| 70      | 110        | 0.002     | 3.099             | 159.672        |
| 69      | 110        | 0         | 3.449             | 152.356        |

**Supplementary Table 23 | Hydrogen bond information between the hydroxyl oxygen (O<sub>111</sub>-hydroxyl) and hydrogen of amine and amide groups of Lys and Gln within 1 ns simulation time at 298 K.**

| H Donor | H Acceptor | Frequency | Avg. Distance (Å) | Avg. Angle (°) |
|---------|------------|-----------|-------------------|----------------|
| 40      | 111        | 0.018     | 3.269             | 158.403        |
| 4       | 111        | 0.016     | 3.272             | 161.174        |
| 41      | 111        | 0         | 3.264             | 171.551        |
| 42      | 111        | 0.131     | 3.073             | 162.321        |
| 59      | 111        | 0.001     | 3.264             | 158.937        |
| 60      | 111        | 0.001     | 3.32              | 162.619        |
| 6       | 111        | 0.074     | 2.8               | 162.588        |
| 62      | 111        | 0.05      | 2.808             | 163.118        |
| 10      | 111        | 0.014     | 3.223             | 158.105        |
| 11      | 111        | 0.002     | 3.289             | 159.083        |
| 12      | 111        | 0.083     | 3.248             | 160.401        |
| 13      | 111        | 0         | 3.208             | 160.825        |
| 66      | 111        | 0.027     | 3.288             | 161.956        |
| 14      | 111        | 0.116     | 3.084             | 160.5          |
| 67      | 111        | 0.004     | 3.277             | 160.221        |
| 68      | 111        | 0.012     | 3.287             | 160.306        |
| 69      | 111        | 0.006     | 3.288             | 162.567        |
| 70      | 111        | 0.023     | 3.072             | 161.638        |

**Supplementary Table 24 | Hydrogen bond information between the carbonyl oxygen (O<sub>110</sub>-carbonyl) and hydrogen of amine and amide groups of Lys and Gln, within 1 ns simulation time at 333 K.**

| H Donor | H Acceptor | Frequency | Avg. Distance (Å) | Avg. Angle (°) |
|---------|------------|-----------|-------------------|----------------|
| 36      | 110        | 0.004     | 2.943             | 158.188        |
| 38      | 110        | 0.034     | 3.263             | 161.035        |
| 3       | 110        | 0.006     | 3.267             | 158.317        |
| 39      | 110        | 0.013     | 3.266             | 160.988        |
| 40      | 110        | 0.028     | 3.276             | 160.119        |
| 4       | 110        | 0.005     | 3.27              | 158.609        |
| 41      | 110        | 0.005     | 3.327             | 160.553        |
| 42      | 110        | 0.019     | 3.168             | 160.995        |
| 59      | 110        | 0         | 3.352             | 156.558        |
| 6       | 110        | 0.237     | 2.778             | 164.046        |
| 62      | 110        | 0.01      | 2.822             | 161.659        |
| 10      | 110        | 0.005     | 3.247             | 158.431        |
| 11      | 110        | 0.001     | 3.213             | 161.414        |
| 64      | 110        | 0         | 3.231             | 160.279        |
| 12      | 110        | 0.039     | 3.309             | 161.619        |
| 31      | 110        | 0.138     | 3.237             | 159.144        |
| 13      | 110        | 0         | 3.458             | 155.306        |
| 32      | 110        | 0.001     | 3.232             | 157.978        |
| 14      | 110        | 0.024     | 3.09              | 160.988        |
| 67      | 110        | 0.002     | 3.366             | 157.737        |
| 68      | 110        | 0         | 3.247             | 171.715        |
| 34      | 110        | 0.223     | 2.788             | 163.463        |
| 70      | 110        | 0.001     | 3.228             | 159.621        |
| 69      | 110        | 0.001     | 3.35              | 161.769        |



**Supplementary Table 25 | Hydrogen bond information between the hydroxyl oxygen (O<sub>111</sub>-hydroxyl) and hydrogen of amine and amide groups of Lys and Gln within 1 ns simulation time at 333 K.**

| H Donor | H Acceptor | Frequency | Avg. Distance (Å) | Avg. Angle (°) |
|---------|------------|-----------|-------------------|----------------|
| 36      | 111        | 0.001     | 3.036             | 157.682        |
| 38      | 111        | 0.014     | 3.257             | 158.809        |
| 3       | 111        | 0.001     | 3.244             | 158.68         |
| 39      | 111        | 0.007     | 3.285             | 160.927        |
| 40      | 111        | 0.022     | 3.254             | 160.523        |
| 4       | 111        | 0         | 3.242             | 160.175        |
| 41      | 111        | 0.006     | 3.304             | 161.077        |
| 42      | 111        | 0.044     | 3.154             | 161.011        |
| 60      | 111        | 0         | 3.341             | 159.522        |
| 6       | 111        | 0.03      | 2.778             | 162.263        |
| 8       | 111        | 0         | 3.288             | 159.913        |
| 62      | 111        | 0.004     | 2.817             | 161.887        |
| 10      | 111        | 0         | 3.289             | 153.744        |
| 11      | 111        | 0.008     | 3.276             | 162.02         |
| 64      | 111        | 0         | 3.172             | 158.9          |
| 12      | 111        | 0.023     | 3.228             | 158.781        |
| 31      | 111        | 0.008     | 3.272             | 159.092        |
| 66      | 111        | 0         | 3.344             | 160.442        |
| 13      | 111        | 0.001     | 3.291             | 160.501        |
| 32      | 111        | 0.005     | 3.236             | 157.484        |
| 14      | 111        | 0.128     | 3.061             | 161.252        |
| 67      | 111        | 0.002     | 3.27              | 160.074        |
| 68      | 111        | 0.002     | 3.241             | 157.838        |
| 34      | 111        | 0.235     | 2.777             | 165.018        |
| 70      | 111        | 0.009     | 3.03              | 162.424        |
| 69      | 111        | 0.002     | 3.246             | 160.407        |

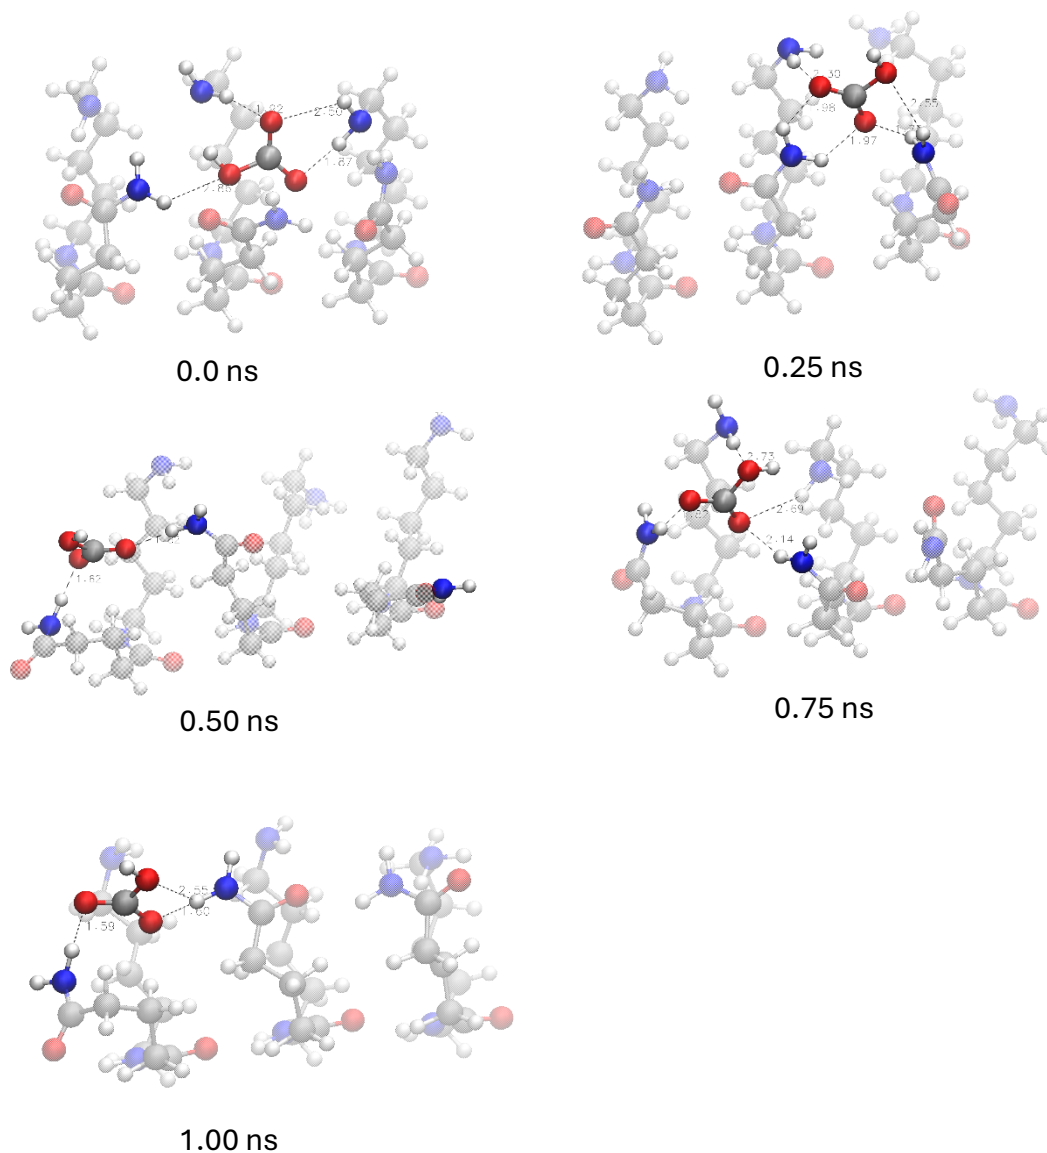

**Supplementary Fig. 42 | Snapshots from MD simulation of stabilization process between bicarbonate and the selected AF cluster within 1 ns at 333 K. The VMD snapshot was taken at 0 ns, 0.25 ns, 0.5 ns, 0.75 ns, and 1 ns.**

## Section 21. Reduced Density Gradient (RDG) Measurement

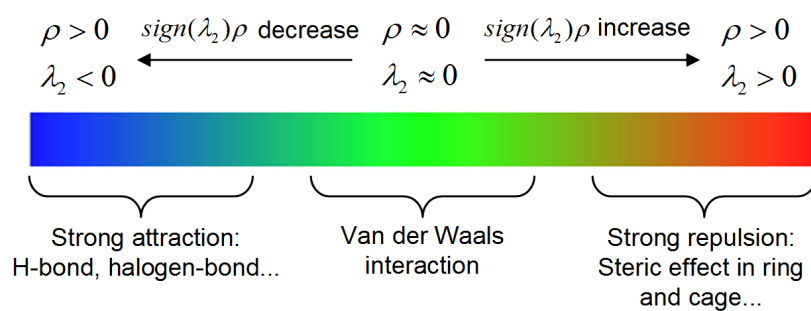

**Supplementary Fig. 43 | Representative example of RDG color mapping.** The blue, green, and red represent hydrogen bonding, van der Waals forces, and electrostatic interactions.

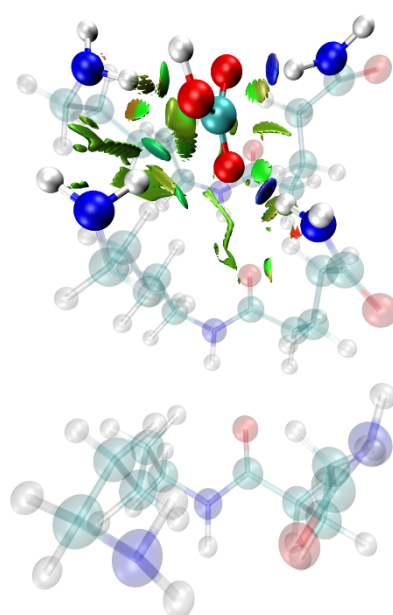

0 ns

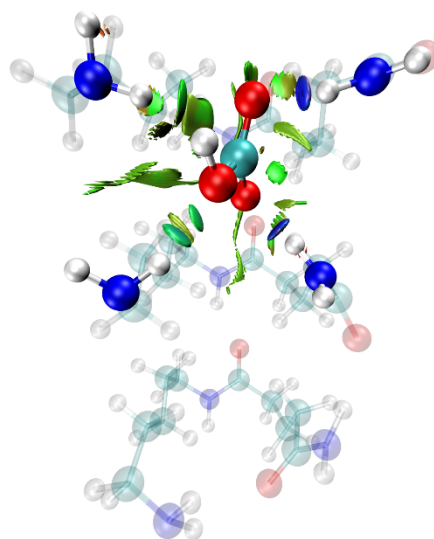

1 ns

**Supplementary Fig. 44 | Two selected snapshots of RDG analysis at 298 K over 1 ns.**

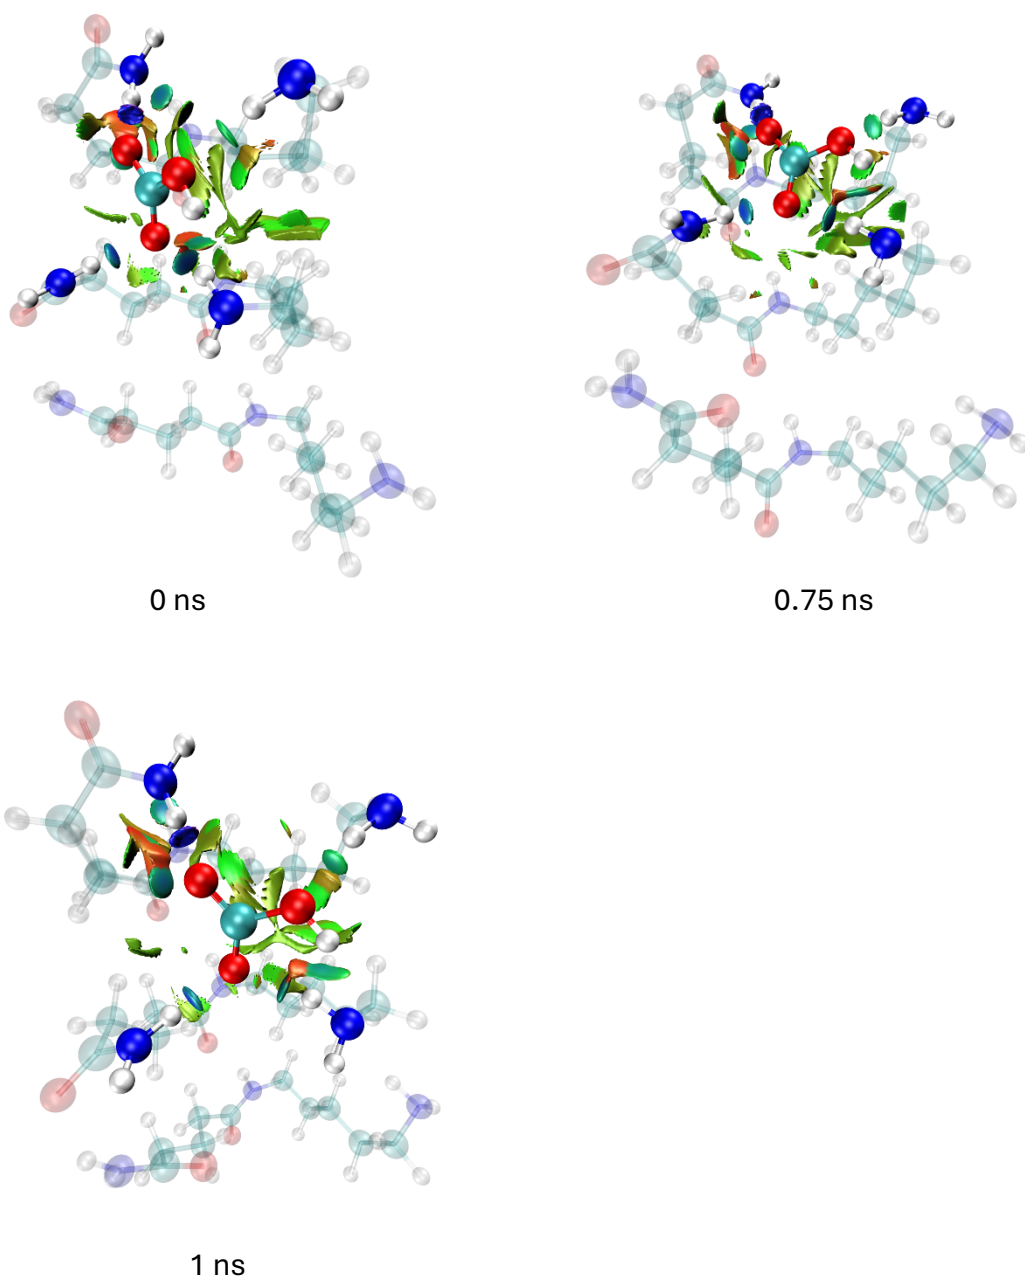

**Supplementary Fig. 45 | Three selected snapshots of RDG analysis at 333 K over 1 ns.**

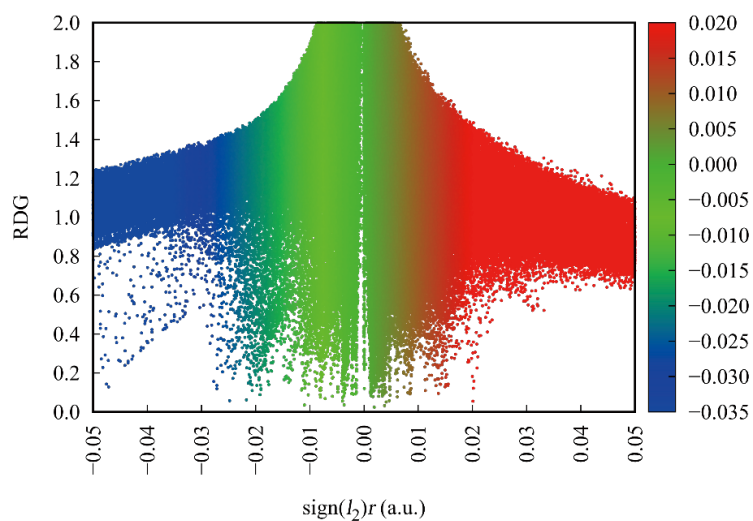

**Supplementary Fig. 46 | RDG analysis of the molecular interaction at 333 K at 0.75 ns.**

## Section 22. Life Cycle Assessment (LCA)

### 22.1 Target and scope definition

#### (1) Target

This study applies the Life Cycle Assessment (LCA) method based on the ISO 14040/14044 standards, with DAC as the application scenario. It compares the environmental impacts of different amine-modified sorbents, including AEAPDMS-NFC, PEI/TEPA-SBA-15, and COF under the same functional unit, providing a basis for the development of eco-friendly DAC sorbents.

#### (2) Functional unit

The selection of a functional unit for DAC should account for material durability and energy efficiency under realistic operating conditions. Here, we define the functional unit as "the sorbent required to capture 1 kg CO<sub>2</sub> from air across 20 operating cycles. This definition enables reasonable comparison between sorbent materials by evaluating long-term performance rather than single-cycle capacity, which is critical for assessing environmental and economic feasibility. The 20-cycle timeframe also captures potential degradation and stability effects that may not emerge in shorter tests, providing a more comprehensive basis for life cycle assessment and technology evaluation. The cyclic performance across 20 cycles of each selected sorbent is obtained from the publications (**Supplementary Tables 3–6**).

To meet the defined functional unit, 0.53 kg of AF microbeads is required, based on an average CO<sub>2</sub> uptake of 2.0 mmol g<sup>-1</sup> across 20 cycles. By contrast, aminosilane-modified NFC requires 32.71 kg due to the intensive chemical pretreatment for cellulose recovery and amine modification, coupled with its lower average uptake (0.70 mmol g<sup>-1</sup>), reflecting a 50% capacity loss over 20 cycles. For comparison, 50% PEI/SBA-15, 50% TEPA/SBA-15, and COF require 0.85, 0.50, and 0.55 kg, respectively, reflecting uptake capacities of 1.34, 2.30, and 2.05 mmol g<sup>-1</sup> across 20 cycles. To standardize energy accounting, the reported synthesis processes, including drying and calcination, were assumed to be conducted using the same laboratory equipment (hot plate, oven, refrigerator, freeze dryer, and rotary evaporator).

#### (3) System boundary

The system boundary for the LCA of DAC sorbents is defined as sorbent production from raw materials followed by DAC operation across 20 cycles. For AF-based sorbents, this includes AF assembly from whey and alkali functionalization. For NFC-, silica-, and COF-supported sorbents, the synthesis of precursors together with subsequent amine modification is considered.

730 In all cases, electricity inputs for the above processes, as well as for thermal and acid-hydroxide  
731 mist regeneration, are included within the boundary.

#### 732 (4) Cut-off criteria

733 Based on the defined system boundary, data collection in this study follows four criteria:

734 (A) Foreground data should include all primary material and energy inputs for each unit  
735 process.

736 (B) Auxiliary materials (e.g., wastewater treatment reagents or trace additives) accounting for  
737 <1% of total material consumption may be excluded, provided their cumulative share does not  
738 exceed 5%.

739 (C) General solid waste representing <1% of total emissions may be excluded.

740 (D) Infrastructure (roads, buildings), process equipment, and consumption or emissions  
741 associated with personnel and living facilities are excluded.

742



## 22.2 Process data collection

**Supplementary Table 26 | Consumption of material and energy of KOH-AF microbead production and regeneration for capturing 1 kg CO<sub>2</sub> from ambient air with 20 cycles.**

|                      | Items                | Quantities | Unit |
|----------------------|----------------------|------------|------|
| Material consumption | Whey protein isolate | 0.51       | kg   |
|                      | Hydrochloric acid    | 0.11       | kg   |
|                      | Potassium hydroxide  | 0.11       | kg   |
|                      | Water                | 433.05     | L    |
| Energy consumption   | Fibrilization        | 1.20       | kWh  |
|                      | Bead synthesis       | 38.74      | kWh  |
|                      | 20-cycle operation   | 0.15       | kWh  |
| Product outputs      | Fibril microbead     | 0.53       | kg   |

**Supplementary Table 27 | Consumption of material and energy of AEAPDMS-NFC<sup>17,24</sup> production and regeneration for capturing 1 kg CO<sub>2</sub> from ambient air with 20 cycles.**

|                      | Items                                                     | Quantities | Unit |
|----------------------|-----------------------------------------------------------|------------|------|
| Material consumption | For AEAPDMS (3-aminopropylmethyldiethoxysilane) synthesis |            |      |
|                      | $\gamma$ -chloropropyl-methyldichlorosilane               | 0.072      | kg   |
|                      | $\gamma$ -chloropropyl-methyldiethoxysilane               | 1.89       | kg   |
|                      | Potassium iodide                                          | 0.0090     | kg   |
|                      | Dry ammonia                                               | 3.84       | kg   |
|                      | Sodium methyrate                                          | 0.15       | kg   |
|                      | Ethanol                                                   | 4.43       | kg   |
|                      | For NFC (Nanofibrillated Cellulose) synthesis             |            |      |
|                      | Bleached kraft pulp                                       | 40.82      | kg   |
|                      | Deionized water                                           | 3586       | L    |
|                      | Sodium hydroxide                                          | 34.23      | kg   |
|                      | Carboxymethylcellulose                                    | 4.40       | kg   |
| Energy consumption   | NFC production                                            | 840        | kWh  |
|                      | Freeze-drying                                             | 80         | kWh  |
|                      | Thermal treatment                                         | 50         | kWh  |
|                      | 20-cycle operation                                        | 100.0      | kWh  |
| Product outputs      | AEAPDMS-NFC-FD cryogel                                    | 32.71      | kg   |

**Supplementary Table 28 | Consumption of material and energy of 50% TEPA/SBA-15<sup>20</sup> production and regeneration for capturing 1 kg CO<sub>2</sub> from ambient air with 20 cycles.**

|                      | Items                | Quantities | Unit |
|----------------------|----------------------|------------|------|
| Material consumption | For SBA-15 synthesis |            |      |
|                      | Pluronic P123        | 0.32       | kg   |
|                      | TEOS                 | 0.62       | kg   |
|                      | HCl (36%)            | 1.89       | kg   |
|                      | Deionized water      | 8.5        | kg   |
|                      | For amine loading    |            |      |
|                      | TEPA                 | 0.25       | kg   |
|                      | Methanol             | 9.81       | kg   |
| Energy consumption   | SBA-15 Synthesis     | 467.3      | kWh  |
|                      | TEPA Impregnation    | 3.28       | kWh  |
|                      | 20-cycle operation   | 99.0       | kWh  |
| Product outputs      | 50% TEPA/SBA-15      | 0.85       | kg   |

**Supplementary Table 29 | Consumption of material and energy of 50% PEI/SBA-15<sup>20</sup> production and regeneration for capturing 1 kg CO<sub>2</sub> from ambient air with 20 cycles.**

|                      | Items                | Quantities      | Unit |
|----------------------|----------------------|-----------------|------|
| Material consumption | For SBA-15 synthesis |                 |      |
|                      | Pluronic P123        | 0.55            | kg   |
|                      | TEOS                 | 0.11            | kg   |
|                      | HCl (36%)            | 3.24            | kg   |
|                      | Deionized water      | 14.5            | kg   |
|                      |                      |                 |      |
|                      | For amine loading    |                 |      |
|                      | PEI                  | 0.43            | kg   |
|                      | Methanol             | 16.80           | kg   |
| Energy consumption   | SBA-15 Synthesis     | 799.80          | kWh  |
|                      | PEI Impregnation     | 4.71            | kWh  |
|                      | 20-cycle operation   | 100.60          | kWh  |
|                      | Product outputs      | 50% TEPA/SBA-15 | 0.50 |

**Supplementary Table 30 | Consumption of material and energy of COF<sup>23</sup> production and regeneration for capturing 1 kg CO<sub>2</sub> from ambient air with 20 cycles.**

|                      | Items                                                                         | Quantities | Unit |
|----------------------|-------------------------------------------------------------------------------|------------|------|
| Material consumption | <b>COF-999-N<sub>3</sub> Synthesis:</b>                                       |            |      |
|                      | TCPB((1,3,5-tris(4-cyanomethylphenyl)benzene))                                | 0.26       | kg   |
|                      | BPDA-N <sub>3</sub> (3,3'-bis[(6-azidohexyl)oxy]-4,4'-biphenyldicarbaldehyde) | 0.46       | kg   |
|                      | Cs <sub>2</sub> CO <sub>3</sub> (cesium carbonate)                            | 0.60       | kg   |
|                      | 1,2-dichlorobenzene                                                           | 10.041     | kg   |
|                      | 1-butanol                                                                     | 6.24       | kg   |
|                      | Methanol                                                                      | 365.67     | kg   |
|                      | <b>COF-999-NH<sub>2</sub> Synthesis:</b>                                      |            |      |
|                      | PPh <sub>3</sub> (triphenylphosphine)                                         | 1.11       | kg   |
|                      | Methanol                                                                      | 210.83     | kg   |
|                      | Water                                                                         | 33.20      | kg   |
|                      | Methanol                                                                      | 16.80      | kg   |
|                      | <b>COF-999 Functionalization:</b>                                             |            |      |
|                      | Toluene                                                                       | 26.70      | kg   |
|                      | Acetic acid                                                                   | 0.081      | kg   |
|                      | Aziridine                                                                     | 1.28       | kg   |
|                      | 1 M NaOH in methanol                                                          | 609.37     | kg   |
|                      | Methanol                                                                      | 79.20      | kg   |
| Energy consumption   | COF-999-N <sub>3</sub> Synthesis                                              | 907.40     | kWh  |
|                      | COF-999-NH <sub>2</sub> Synthesis                                             | 367.40     | kWh  |
|                      | COF-999 Functionalization                                                     | 1,338.90   | kWh  |
|                      | 20-cycle operation                                                            | 40.0       | kWh  |
| Product outputs      | COF-999                                                                       | 0.55       | kg   |

## 22.3 Life cycle impact assessment (LCIA)

### (1) Impact assessment method

The LCIA is conducted using the ReCiPe 2016 V1.10 midpoint (H) impact assessment method, which includes 18 environmental impact indicators.

**Supplementary Table 31 | Environmental impact indicators categories for LCA.**

| Impact category                         | Unit                     |
|-----------------------------------------|--------------------------|
| Global warming                          | kg CO <sub>2</sub> eq    |
| Stratospheric ozone depletion           | kg CFC11 eq              |
| Ionizing radiation                      | kBq Co-60 eq             |
| Ozone formation, Human health           | kg NO <sub>x</sub> eq    |
| Fine particulate matter formation       | kg PM <sub>2.5</sub> eq  |
| Ozone formation, Terrestrial ecosystems | kg NO <sub>x</sub> eq    |
| Terrestrial acidification               | kg SO <sub>2</sub> eq    |
| Freshwater eutrophication               | kg P eq                  |
| Marine eutrophication                   | kg N eq                  |
| Terrestrial ecotoxicity                 | kg 1,4-DCB               |
| Freshwater ecotoxicity                  | kg 1,4-DCB               |
| Marine ecotoxicity                      | kg 1,4-DCB               |
| Human carcinogenic toxicity             | kg 1,4-DCB               |
| Human non-carcinogenic toxicity         | kg 1,4-DCB               |
| Land use                                | m <sup>2</sup> a crop eq |
| Mineral resource scarcity               | kg Cu eq                 |
| Fossil resource scarcity                | kg oil eq                |
| Water consumption                       | m <sup>3</sup>           |

## (2) Impact assessment results

**Supplementary Table 32 | Comparison of LCIA results between AF microbead and selected four sorbents for capturing 1 kg CO<sub>2</sub> from ambient air with 20 cycles.**

| Impact category                         | Unit                     | This work   | AEAPDMS-NFC | PEI/SBA-15 | TEPA/SBA-15 | COF        |
|-----------------------------------------|--------------------------|-------------|-------------|------------|-------------|------------|
| Global warming                          | kg CO <sub>2</sub> eq    | 22.82354483 | 1098.3367   | 709.22089  | 447.94778   | 3421.81974 |
| Stratospheric ozone depletion           | kg CFC11 eq              | 3.42203E-05 | 0.000362491 | 0.0002326  | 0.000147643 | 0.00089398 |
| Ionizing radiation                      | kBq Co-60 eq             | 1.693063999 | 66.56292    | 78.952494  | 49.748102   | 249.757763 |
| Ozone formation, Human health           | kg NO <sub>x</sub> eq    | 0.052622417 | 2.4043065   | 1.6142727  | 1.0193991   | 7.17086086 |
| Fine particulate matter formation       | kg PM2.5 eq              | 0.042934053 | 1.7002477   | 1.4210086  | 0.8968314   | 5.18212854 |
| Ozone formation, Terrestrial ecosystems | kg NO <sub>x</sub> eq    | 0.054070925 | 2.525533    | 1.6534097  | 1.0437564   | 7.71951491 |
| Terrestrial acidification               | kg SO <sub>2</sub> eq    | 0.097870259 | 3.3150415   | 2.3713933  | 1.4978141   | 9.12443574 |
| Freshwater eutrophication               | kg P eq                  | 0.010534155 | 0.54518094  | 0.4095353  | 0.25831168  | 1.47614375 |
| Marine eutrophication                   | kg N eq                  | 0.005366405 | 0.03882813  | 0.0244159  | 0.015362818 | 0.10771758 |
| Terrestrial ecotoxicity                 | kg 1,4-DCB               | 118.3167207 | 8956.3156   | 2573.6473  | 1700.0016   | 19647.4165 |
| Freshwater ecotoxicity                  | kg 1,4-DCB               | 1.324511615 | 50.887576   | 43.233012  | 27.273641   | 149.714212 |
| Marine ecotoxicity                      | kg 1,4-DCB               | 1.776645567 | 74.14742    | 56.738599  | 35.880911   | 208.279418 |
| Human carcinogenic toxicity             | kg 1,4-DCB               | 3.389784056 | 147.71579   | 81.425163  | 51.417715   | 402.740701 |
| Human non-carcinogenic toxicity         | kg 1,4-DCB               | 27.25549646 | 1119.9162   | 834.59406  | 526.80007   | 2958.50153 |
| Land use                                | m <sup>2</sup> a crop eq | 23.04132398 | 56.562695   | 14.913096  | 9.4051898   | 57.935383  |
| Mineral resource scarcity               | kg Cu eq                 | 0.06953164  | 2.6167137   | 1.2557484  | 0.79497536  | 6.22842128 |
| Fossil resource scarcity                | kg oil eq                | 5.1748631   | 340.28618   | 187.52261  | 118.24692   | 1706.4028  |
| Water consumption                       | m <sup>3</sup>           | 0.68296118  | 39.18485    | 4.5131879  | 2.9011939   | 18.3424054 |

### **(3) Interpretation of LCIA results**

The LCIA results show that, under the same functional unit (capturing 1 kg CO<sub>2</sub> under 20 cycles) and comparable system boundary conditions, the AF microbead exhibits a significantly lower environmental impact than the amine-based sorbents. Among the 18 selected environmental impact indicators, AF microbead demonstrates unparalleled environmental performance, with impacts reduced by more than 95–99% across nearly all categories when benchmarked against NFC (set to 100%). Even when compared with established amine–silica sorbents, this work consistently delivers an order of magnitude lower burdens, underscoring its potential as a truly sustainable DAC material<sup>25</sup>.

For eutrophication, this work records only 0.71% of NFC in freshwater and 4.99% in marine systems, representing reductions of more than 99% relative to NFC and at least 4–7 times lower impacts than PEI-silica (22–36%) and TEPA-silica (18–28%). Resource consumption is also minimized: water use accounts for 1.74% of NFC, compared with 7–12% for amine-silica. Mineral resource scarcity is only 1.12%, nearly 20–40 × lower than PEI-silica (42.0%) and TEPA-silica (20.2%). Fossil resource use falls to 0.30%, confirming a 97–99% advantage.

Similar margins reduce human health impacts. Carcinogenic toxicity is 0.84% of NFC, versus 20–37% for amine–silica. Non-carcinogenic toxicity remains at 0.92%, compared with 28–38% for silica-based sorbents. Freshwater and marine ecotoxicity are reduced to ~0.85–0.88%, at least 30 × lower than TEPA-silica and PEI-silica.

Air-quality indicators show the same pattern. Fine particulate matter formation is 0.83%, while ozone formation (human health) is 0.73%, both far below TEPA-silica (22–27%) and PEI-silica (33%).

Climate-related burdens further highlight the advantage. The global warming impact is only 0.67% of NFC, more than 30 times lower than amine–silica. Stratospheric ozone depletion is 3.83%, still an order of magnitude below silica benchmarks.



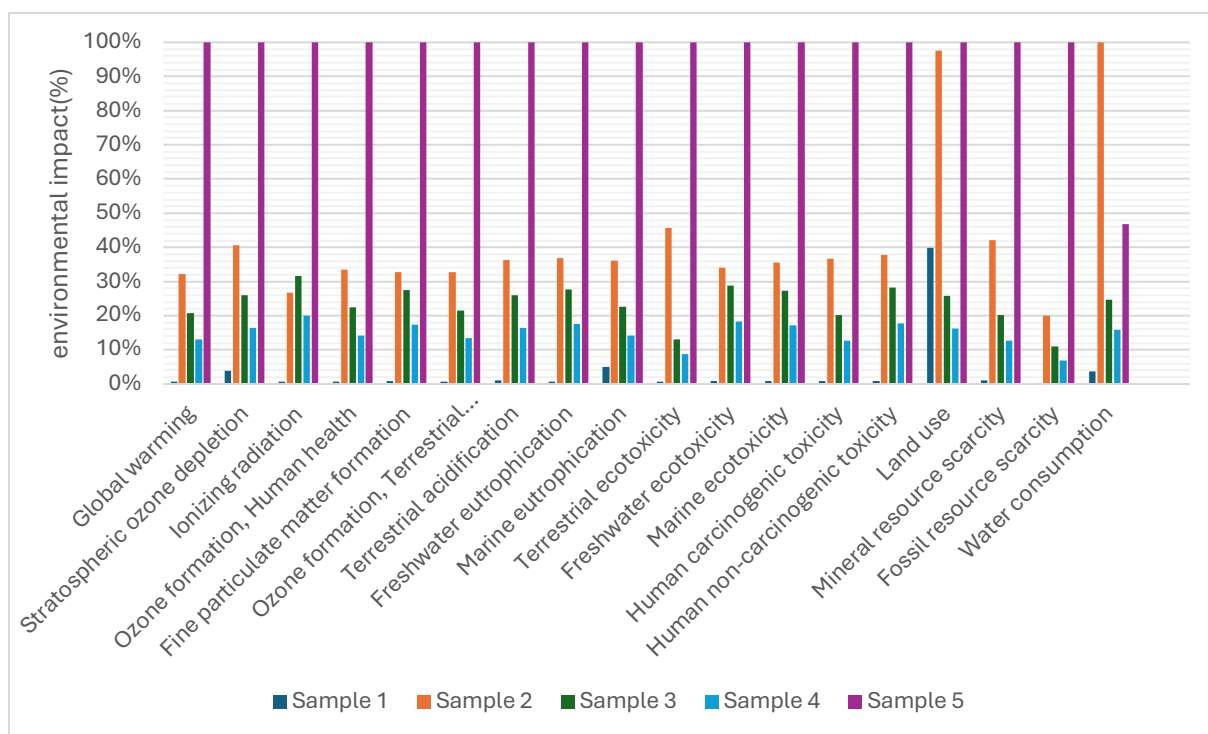

**Supplementary Fig. 47 | Bar diagram of the LCA results.** Samples 1, 2, 3, 4, and 5 represent this work, AEAPDMS-NFC, TEPA/SBA-15, PEI/SBA-15, and COF, respectively.

## 814 Section 23. Biodegradability Test

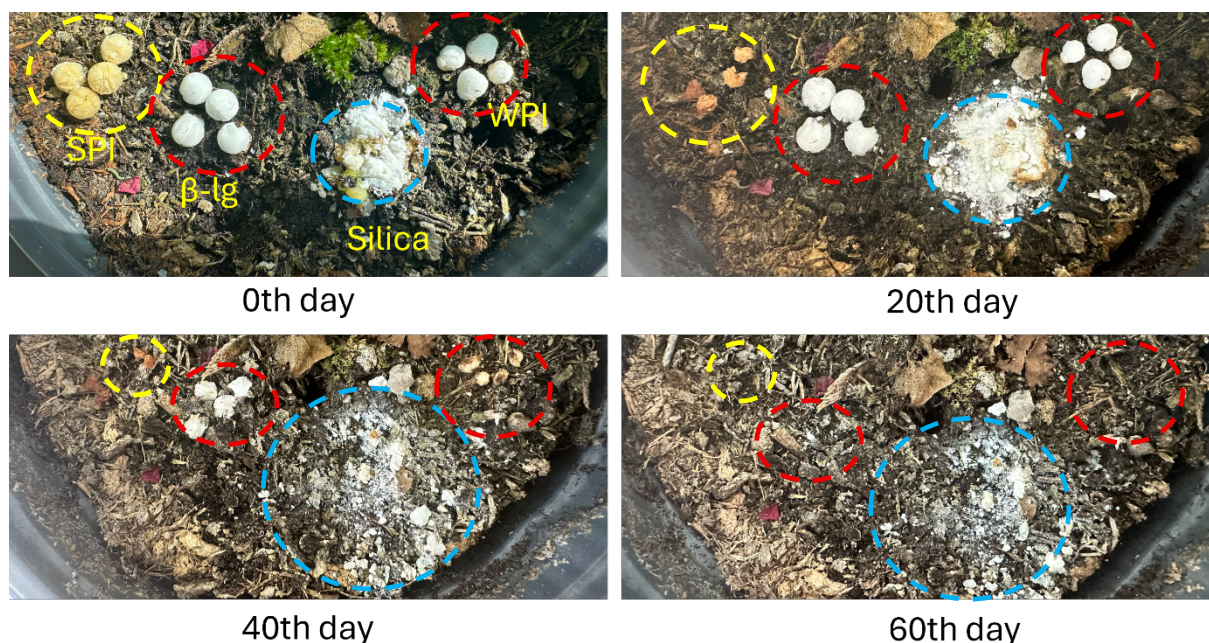

815 **Supplementary Fig. 48 | Biodegradability of KOH-modified SPI,  $\beta$ -Ig, WPI AF microbeads,**  
 816 **and PEI-grafted mesoporous silica.** The tested material was placed on the soil surface in an  
 817 indoor flower pot for full exposure to ambient air ( $\sim 420$  ppm CO<sub>2</sub>, 28–30 °C, 30–40% RH)  
 818 during June–August 2025. To minimize the influence of water on degradation, watering was  
 819 limited to once every two to three weeks. Note that the drying of the soil was caused by high  
 820 temperature and water insufficiency.

## Section 24. The Ranking Efficiency Product (REP)

### 24.1 Definition and calculation

To enable a more systematic and comparable assessment of CO<sub>2</sub> capture, we rely on the compact index provided by the ranking efficiency product (REP)<sup>26</sup>, which integrates normalized scores of the six main assessment key criteria, such as: i) adsorption capacity, ii) regeneration temperature, iii) regeneration time, iv) cycling stability, v) production cost, vi) sustainability (glo from the LCA analysis). This composite metric provides a quantitative basis for benchmarking different CO<sub>2</sub> capture technologies, facilitating the evaluation of trade-offs between their respective advantages and limitations.

To calculate the REP value for any ( $j$ ) of the CO<sub>2</sub> capture technologies considered, we use the following equation<sup>26</sup>.

$$REP_j = \left[ \prod_i^n (r_i/r_{i-MAX})_j \right]^{1/n}$$

Where  $r_i$  is the individual ranking score for the characteristic  $i$  of the CO<sub>2</sub> capture technology  $j$  under scrutiny. According to this simple approach, a technology  $j$  can be evaluated by ranking each  $i$  of the  $n$  independent characteristics (6 in the present case) between a minimum  $r_{i-MIN}$  and a maximum rank,  $r_{i-MAX}$ . REP as defined above varies between ( $r_{i-MIN}/r_{i-MAX}$ ) and 1, for the worst and best performing technologies, respectively. The individual values from which  $r_i$  are calculated are given in Supplementary Fig. 49. Individual literature values are ranked on linear scales and normalized, to vary between 1 (minimum score) and 5 (maximum score).

## 24.2 Calculation boundaries

Following the sustainability framework of our previous work<sup>26</sup>, technological sustainability should be assessed not solely by CO<sub>2</sub> capture capacity but through a comprehensive analysis of environmental, energetic, and economic factors<sup>27</sup>. To ensure a unified and quantitative comparison across sorbents with differing physicochemical and operational characteristics, each parameter was linearly normalized to a five-point scale (1–5), where 5 represents the best achievable performance and 1 the least favorable. The scaling references were fixed according to experimentally or literature-validated benchmarks. The CO<sub>2</sub> uptake capacity was linearly scaled between 1.34 mmol g<sup>-1</sup> (1 point) and 2.30 mmol g<sup>-1</sup> (5 points)<sup>28</sup>. The desorption temperature was inversely rated from 25 °C (5 points) to 120 °C (1 point), and the desorption time from 11 min (5 points) to 60 min (1 point). The cycling stability was proportionally scaled up to 100 cycles (5 points). The capture cost was inversely scaled using the experimentally derived cost to capture 1 kg CO<sub>2</sub> over 20 cycles (**Section 22.2**), with 3.04–8.64 € kg<sup>-1</sup> CO<sub>2</sub> (8.64 € for 5 points) for the KOH-AF microbeads and proportionally lower scores up to 1119.78 € kg<sup>-1</sup> CO<sub>2</sub> (1 point) for the most energy-intensive COF system. Finally, the life-cycle CO<sub>2</sub> emission (kg CO<sub>2</sub> eq per kg CO<sub>2</sub> captured) was inversely scaled between 22.8 (5 points) and 3421.82 (1 point). The overall sustainability index (REP<sub>(1–5)</sub>) was then calculated as the geometric mean of the six normalized scores, integrating environmental, energetic, and economic contributions into a single dimensionless indicator.

Using this multi-criteria REP analysis, the KOH–AF microbeads exhibited the highest overall sustainability (REP ≈ 0.80) among representative thermally regenerable DAC sorbents (**Supplementary Fig. 49**). Crucially, their CO<sub>2</sub> uptake of 2.20 mmol g<sup>-1</sup> was measured under real ambient air (~420 ppm CO<sub>2</sub>, ~21 % O<sub>2</sub>, 40–55% RH), whereas the comparison sorbents, such as AEAPDMS-NFC and PEI/TEPA-silica, were tested in O<sub>2</sub>-free simulated air, conditions that overestimate amine performance by suppressing oxidative degradation. Even under these more demanding, realistic conditions, the AF microbeads achieved thermal-free regeneration (25 °C, ~11 min), outperforming heat-driven COF and amine–silica systems (60–120 °C). Their high REP arises from the synergy of low-temperature, rapid regeneration, minimal life-cycle CO<sub>2</sub> emissions (22.8 kg CO<sub>2</sub>-eq kg<sup>-1</sup> CO<sub>2</sub>), and low capture cost (8.64 € kg<sup>-1</sup> CO<sub>2</sub> over 20 cycles). In contrast, COF-999 and AEAPDMS–NFC display much higher embodied emissions (≈ 1100–3400 kg CO<sub>2</sub>-eq kg<sup>-1</sup> CO<sub>2</sub>) and costs (≈ 280–1120 € kg<sup>-1</sup> CO<sub>2</sub>), yielding markedly lower REP values (0.45–0.52). Analogous to adsorption technologies in sustainable water purification, these results highlight that waste-protein-derived amyloid-fibril sorbents, built

875 from circular, biodegradable feedstocks, can rival, and, when evaluated under realistic ambient-  
876 air conditions, surpass synthetic frameworks in overall sustainability, situating them within the  
877 most sustainable quadrant of the DAC landscape.

878

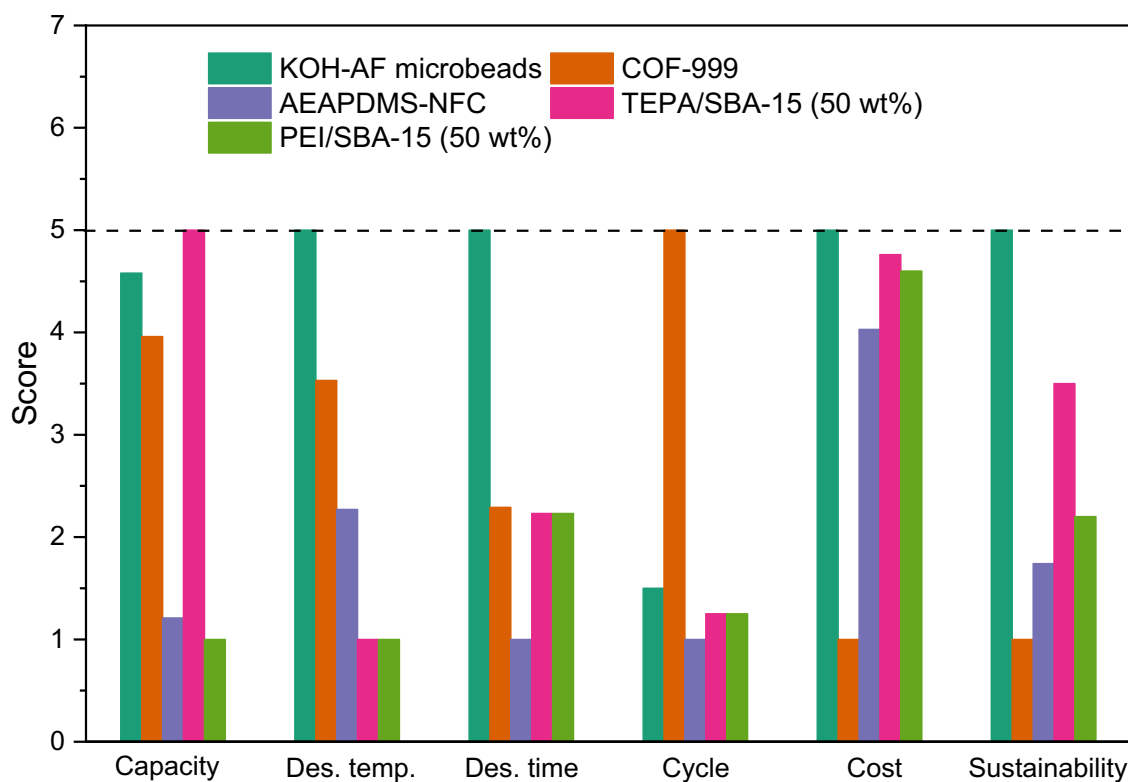

**Supplementary Fig. 49 | A comparison of the technological edges of KOH-WPI AF microbeads with sorbents described in the LCA section according to the rank product statistics. 1 and 5 correspond to the worst and best performance, respectively.**

## Section 25. Techno-Economic Assessment (TEA)

**Supplementary Table 33 | Cost analysis for KOH-WPI AF microbeads for capturing 1 kg and 1 ton CO<sub>2</sub> from air.**

|              | Price             | Unit    | input             | unit                |
|--------------|-------------------|---------|-------------------|---------------------|
| Whey protein | 0.80–1.40         | EUR/kg  | 3.80 <sup>b</sup> | kg                  |
| HCl          | 0.4233            | EUR/kg  | 0.11              | kg                  |
| NaOH         | 0.382             | EUR/kg  | 0.11              | kg                  |
| Water        | 8.08E-05          | EUR/kg  | 433.05            | kg                  |
| Electricity  | 0.1070            | EUR/kWh | 12.45             | kWh                 |
| Total cost   | 3.04              | EUR     | 1                 | kg CO <sub>2</sub>  |
|              | 3.58 <sup>c</sup> | USD     |                   |                     |
|              | 342 <sup>d</sup>  | EUR     | 1                 | ton CO <sub>2</sub> |
|              | 372               | USD     |                   |                     |

*a*, lower-end animal feed grade whey powder.

*b*, The raw whey powder required to obtain 0.506 g WPI isolate.

*c*, The value in EUR was converted to US\$2022 terms using annual exchange rates from the International Monetary Fund (IMF)<sup>27</sup>

*d*, Adsorbent consumption is assumed to be 3.80 kg under 3000 cycles, 3.6 kWh per cycle, and CO<sub>2</sub> uptake is assumed to be 2.0 mmol g<sup>-1</sup>.

## Section 26. Roasted Coffee Bean Degassing

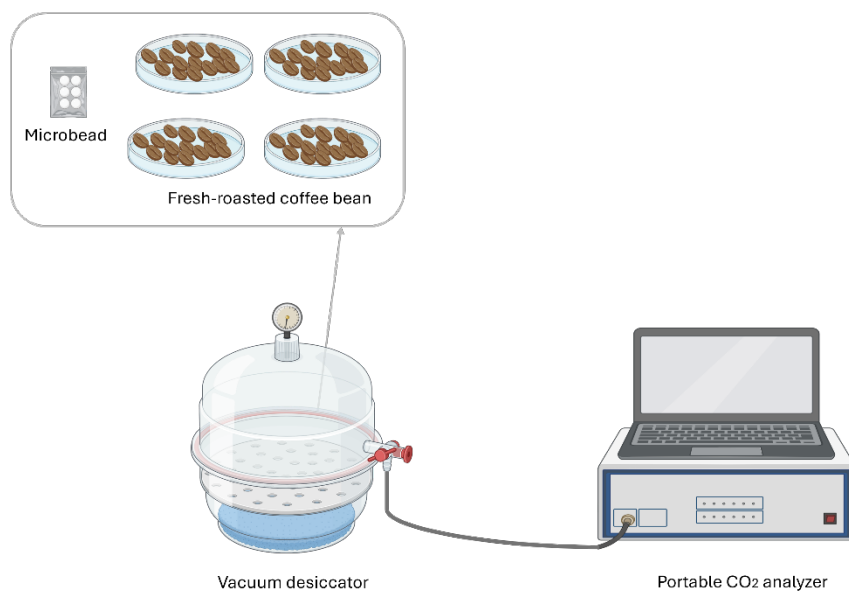

**Supplementary Fig. 50 | Schematic diagram of CO<sub>2</sub> removal experiments using KOH-AF WPI microbeads for freshly roasted coffee beans.** Freshly roasted coffee beans were purchased from a local coffee shop. The coffee beans without any treatment served as the blank.



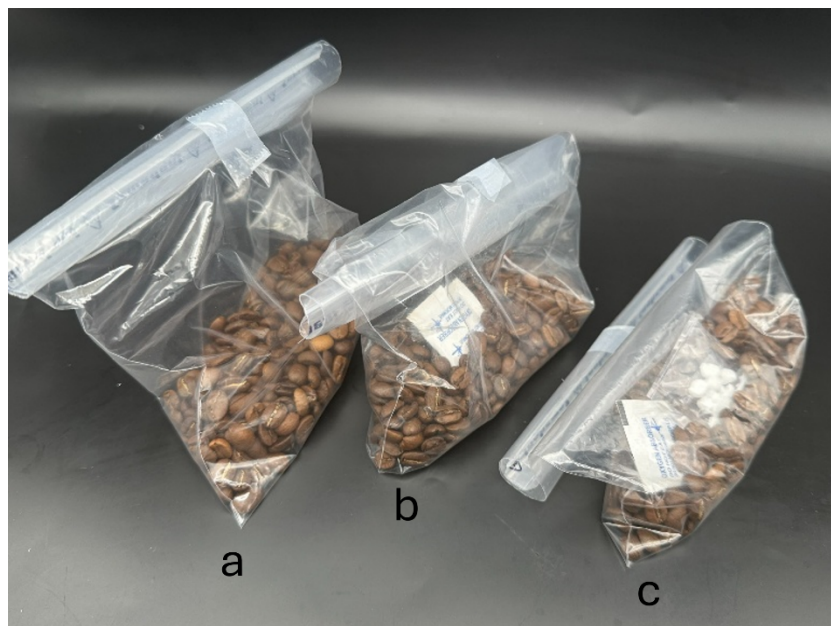

**Supplementary Fig. 51 | Comparison of in-pack gas volume during coffee bean storage.** Each bag contained 50 g of freshly roasted coffee beans. Commercial coffee packaging typically employs a one-way degassing valve to vent  $\text{CO}_2$  while restricting  $\text{O}_2$  ingress. To isolate the effects of gas capture, the freshly roasted beans were sealed without prior degassing or  $\text{N}_2$  purging. In this valveless configuration, a commercial oxygen adsorbent was included to minimize the influence of residual  $\text{O}_2$  on pouch swelling, for example, from lipid oxidation. **a**, Without any sorbent, the bag exhibited pronounced swelling, primarily due to  $\text{CO}_2$  evolution and residual  $\text{O}_2$ . **b**, With only the oxygen adsorbent, swelling was reduced but remained evident because  $\text{CO}_2$  was neither vented nor captured. **c**, When both the oxygen adsorbent and  $\text{CO}_2$ -capturing microbeads were included, the bag showed the smallest headspace volume, consistent with simultaneous  $\text{O}_2$  removal and  $\text{CO}_2$  sequestration by the microbeads<sup>29</sup>.

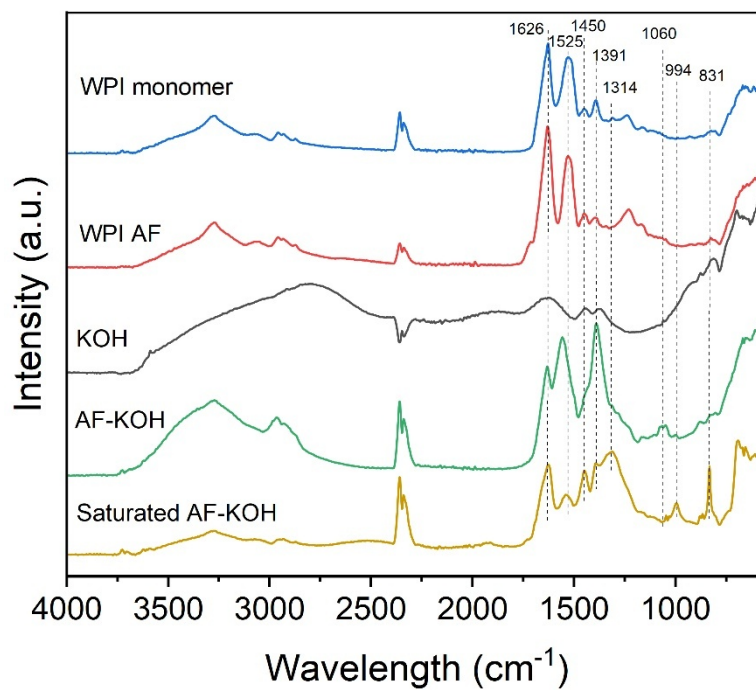

**Supplementary Fig. 52 | FT-IR spectra of KOH-WPI AF microbead before and after coffee bean degassing experiment.**

## Section 27. In vitro Simulated Digestion

**Supplementary Table 34 | Free amino acid analysis of pure AF microbeads after simulated in vitro digestion.** The values are representative of three independent replicates (n = 3).

| Pure AF microbead |                                          |
|-------------------|------------------------------------------|
| Item              | Amino acid content (mg g <sup>-1</sup> ) |
| Asp               | 115.76, 112.41, 116.81                   |
| Thr               | 43.84, 46.00, 44.7                       |
| Ser               | 41.87, 39.67, 43.42                      |
| Glu               | 192.75, 176.56, 192.91                   |
| Pro               | 52.73, 53.31, 54.61                      |
| Gly               | 34.65, 36.39, 35.82                      |
| Ala               | 40.26, 38.79, 41.09                      |
| Cys               | 20.49, 20.64, 20.76                      |
| Val               | 33.15, 31.81, 32.96                      |
| Met               | 12.06, 10.85, 11.88                      |
| Ile               | 27.43, 28.6, 27.28                       |
| Leu               | 75.49, 71.14, 76.65                      |
| Tyr               | 19.30, 17.54, 19.35                      |
| Phe               | 25.12, 23.69, 25.16                      |
| Lys               | 63.86, 60.52, 67.05                      |
| His               | 15.45, 16.28, 15.90                      |
| Arg               | 17.25, 17.47, 16.59                      |

933 **Supplementary Table 35 | Free amino acid analysis of spent KOH-WPI AF microbeads**  
 934 **from in-pack experiment after simulated in vitro digestion.** The values are representative of  
 935 three independent replicates (n = 3).

| CO <sub>2</sub> -saturated AF microbeads |                                          |
|------------------------------------------|------------------------------------------|
| Item                                     | Amino acid content (mg g <sup>-1</sup> ) |
| Asp                                      | 99.02, 91.52, 108.49                     |
| Thr                                      | 38.66, 38.29, 39.18                      |
| Ser                                      | 41.15, 44.58, 39.86                      |
| Glu                                      | 156.69, 169.92, 146.79                   |
| Pro                                      | 62.44, 63.92, 62.25                      |
| Gly                                      | 42.09, 42.2, 43.46                       |
| Ala                                      | 35.44, 36.95, 35.84                      |
| Cys                                      | 15.69, 15.42, 16.44                      |
| Val                                      | 27.92, 28.88, 27.41                      |
| Met                                      | 9.45, 8.92, 9.96                         |
| Ile                                      | 27.11, 27.06, 27.2                       |
| Leu                                      | 61.73, 60.55, 62.71                      |
| Tyr                                      | 17.69, 16.94, 18.16                      |
| Phe                                      | 22.85, 23.17, 22.48                      |
| Lys                                      | 44.63, 43.65, 44.58                      |
| His                                      | 12.95, 13.46, 11.92                      |
| Arg                                      | 15.39, 14.52, 14.14                      |

936  
 937

## Section 28. Potential Application in Fertilizer

**Supplementary Table 36 | Estimated N: K ratio of spent KOH-WPI AF microbeads.**

| Quantity                | Value                      | Formula                        |
|-------------------------|----------------------------|--------------------------------|
| AF mass (g)             | 5.00                       | Baseline for 5:1 example       |
| KOH mass (g)            | 1.00                       | From AF: KOH = 5:1             |
| Protein N content (wt%) | 16.0%                      | Jones factor 6.25              |
| Nitrogen mass, N (g)    | 0.80                       | $0.16 \times \text{AF mass}$   |
| K mass fraction in KOH  | 0.697                      | 39.10/56.11                    |
| Potassium mass, K (g)   | 0.697                      | $0.697 \times \text{KOH mass}$ |
| N: K by mass            | 1.15:1 (this work)         | 0.80:0.697                     |
|                         | 0.34:1 (Potassium nitrate) |                                |
|                         | 1.20:1 (NPK 20 20 20)      |                                |

## References

1. Fakhraee, M., Planavsky, N. J. & Reinhard, C. T. Ocean alkalinity enhancement through restoration of blue carbon ecosystems. *Nat. Sustain.* **6**, 1087–1094 (2023).
2. Sabine, C. L. *et al.* The Oceanic Sink for Anthropogenic CO<sub>2</sub>. *Science* **305**, 367–371 (2004).
3. Fan, M. *et al.* Structuring ZIF-8-based hybrid material with hierarchical pores by in situ synthesis and thermal treatment for enhancement of CO<sub>2</sub> uptake. *J. Solid State Chem.* **269**, 507–512 (2019).
4. Kumar, S., de A. e Silva, J., Wani, M. Y., Gil, J. M. & Sobral, A. J. F. N. Carbon dioxide capture and conversion by an environmentally friendly chitosan based meso-tetrakis(4-sulfonatophenyl) porphyrin. *Carbohydr. Polym.* **175**, 575–583 (2017).
5. Wang, Y., Qu, L., Ding, H., Webley, P. & Li, G. K. Distributed direct air capture of carbon dioxide by synergistic water harvesting. *Nat. Commun.* **15**, 9745 (2024).
6. Hsan, N., Dutta, P. K., Kumar, S., Bera, R. & Das, N. Chitosan grafted graphene oxide aerogel: Synthesis, characterization and carbon dioxide capture study. *Int. J. Biol. Macromol.* **125**, 300–306 (2019).
7. Li, H. *et al.* Capturing carbon dioxide from air with charged-sorbents. *Nature* **630**, 654–659 (2024).
8. Zhu, Y., Booth, A. & Hatzell, K. B. Confinement Effects on Moisture-Swing Direct Air Capture. *Environ. Sci. Technol. Lett.* **11**, 89–94 (2024).
9. Chen, O. I.-F. *et al.* Water-Enhanced Direct Air Capture of Carbon Dioxide in Metal–Organic Frameworks. *J. Am. Chem. Soc.* **146**, 2835–2844 (2024).
10. Wang, T., Lackner, K. S. & Wright, A. Moisture Swing Sorbent for Carbon Dioxide Capture from Ambient Air. *Environ. Sci. Technol.* **45**, 6670–6675 (2011).
11. McDonald, T. M. *et al.* Capture of Carbon Dioxide from Air and Flue Gas in the Alkylamine-Appended Metal–Organic Framework mmen-Mg<sub>2</sub>(dobpdc). *J. Am. Chem. Soc.* **134**, 7056–7065 (2012).
12. Bien, C. E. *et al.* Bioinspired Metal–Organic Framework for Trace CO<sub>2</sub> Capture. *J. Am. Chem. Soc.* **140**, 12662–12666 (2018).
13. CO<sub>2</sub> capture using whey protein isolate.
14. Li, D. *et al.* Designed amyloid fibers as materials for selective carbon dioxide capture. *Proc. Natl. Acad. Sci.* **111**, 191–196 (2014).
15. Dong, Z. *et al.* Amine-Functionalized Amyloid Aerogels for CO<sub>2</sub> Capture. *ChemSusChem* **16**, e202300767 (2023).
16. Peydayesh, M. *et al.* Amyloid fibril-UiO-66-NH<sub>2</sub> aerogels for environmental remediation. *Chem. Commun.* **58**, 5104–5107 (2022).
17. Gebald, C., Wurzbacher, J. A., Tingaut, P., Zimmermann, T. & Steinfeld, A. Amine-Based Nanofibrillated Cellulose As Adsorbent for CO<sub>2</sub> Capture from Air. *Environ. Sci. Technol.* **45**, 9101–9108 (2011).
18. Gebald, C., Wurzbacher, J. A., Borgschulte, A., Zimmermann, T. & Steinfeld, A. Single-Component and Binary CO<sub>2</sub> and H<sub>2</sub> O Adsorption of Amine-Functionalized Cellulose. *Environ. Sci. Technol.* **48**, 2497–2504 (2014).
19. Sehaqui, H. *et al.* Fast and Reversible Direct CO<sub>2</sub> Capture from Air onto All-Polymer Nanofibrillated Cellulose—Polyethylenimine Foams. *Environ. Sci. Technol.* **49**, 3167–3174 (2015).
20. Miao, Y., He, Z., Zhu, X., Izikowitz, D. & Li, J. Operating temperatures affect direct air capture of CO<sub>2</sub> in polyamine-loaded mesoporous silica. *Chem. Eng. J.* **426**, 131875 (2021).

- 990 21. Wang, J. *et al.* Direct Capture of Low-Concentration CO<sub>2</sub> on Mesoporous Carbon-  
991 Supported Solid Amine Adsorbents at Ambient Temperature. *Ind. Eng. Chem. Res.* **54**,  
992 5319–5327 (2015).
- 993 22. Zhu, X. *et al.* Efficient CO<sub>2</sub> capture from ambient air with amine-functionalized Mg–  
994 Al mixed metal oxides. *J. Mater. Chem. A* **8**, 16421–16428 (2020).
- 995 23. Zhou, Z. *et al.* Carbon dioxide capture from open air using covalent organic  
996 frameworks. *Nature* **635**, 96–101 (2024).
- 997 24. Leonzio, G., Mwabonje, O., Fennell, P. S. & Shah, N. Environmental performance of  
998 different sorbents used for direct air capture. *Sustain. Prod. Consum.* **32**, 101–111 (2022).
- 999 25. Deutz, S. & Bardow, A. Life-cycle assessment of an industrial direct air capture  
1000 process based on temperature–vacuum swing adsorption. *Nat. Energy* **6**, 203–213 (2021).
- 1001 26. Bolisetty, S., Peydayesh, M. & Mezzenga, R. Sustainable technologies for water  
1002 purification from heavy metals: review and analysis. *Chem. Soc. Rev.* **48**, 463–487 (2019).
- 1003 27. Sievert, K., Schmidt, T. S. & Steffen, B. Considering technology characteristics to  
1004 project future costs of direct air capture. *Joule* **8**, 979–999 (2024).
- 1005 28. Kwon, H. T. *et al.* Aminopolymer-Impregnated Hierarchical Silica Structures:  
1006 Unexpected Equivalent CO<sub>2</sub> Uptake under Simulated Air Capture and Flue Gas Capture  
1007 Conditions. *Chem. Mater.* **31**, 5229–5237 (2019).
- 1008 29. Anderson, B. A., Shimoni, E., Liardon, R. & Labuza, T. P. The diffusion kinetics of  
1009 carbon dioxide in fresh roasted and ground coffee. *J. Food Eng.* **59**, 71–78 (2003).
- 1010
